1 **Full title: An agent-based model of insect resistance management and mitigation**  
2 **for Bt maize: A social science perspective**

3  
4 **Short title: Agent-based model of insect resistance management and mitigation for**  
5 **Bt Maize**

## 6 Authors

### 7 **Yuji Saikai**

8 ROLES: Conceptualization, Software, Data curation, Formal analysis, Investigation,  
9 Methodology, Visualization, Writing – original draft, Writing – review & editing

10 E-mail: saikai@wisc.edu

11 AFFILIATION: Department of Agricultural and Applied Economics, University of Wisconsin-  
12 Madison, WI USA

13

### 14 **Paul D. Mitchell**

15 ROLES: Conceptualization, Formal analysis, Investigation, Methodology, Visualization,  
16 Writing – original draft, Writing – review & editing, Funding acquisition, Supervision

17 E-mail: pdmitchell@wisc.edu

18 AFFILIATION: Department of Agricultural and Applied Economics, University of Wisconsin-  
19 Madison, WI USA

20

### 21 **Terrance M. Hurley**

22 ROLES: Conceptualization, Writing – review & editing, Funding Acquisition

23 AFFILIATION: Department of Applied Economics, University of Minnesota, St. Paul, MN USA

24

## 25 Abstract

26 Managing and mitigating agricultural pest resistance to control technologies is a complex  
27 system in which biological and social factors spatially and dynamically interact. We build a  
28 spatially explicit population genetics model for the evolution of pest resistance to Bt toxins  
29 by the insect *Ostrinia nubilalis* and an agent-based model of Bt maize adoption, emphasizing  
30 the importance of social factors. The farmer adoption model for Bt maize weighed both  
31 individual profitability and adoption decisions of neighboring farmers to mimic the effects  
32 of economic incentives and social networks. The model was calibrated using aggregate  
33 adoption data for Wisconsin. Simulation experiments with the model provide insights into  
34 mitigation policies for a high-dose Bt maize technology once resistance emerges in a pest  
35 population. Mitigation policies evaluated include increased refuge requirements for all farms,  
36 localized bans on Bt maize where resistance develops, areawide applications of insecticidal  
37 sprays on resistant populations, and taxes on Bt maize seed for all farms. Evaluation metrics  
38 include resistance allele frequency, pest population density, farmer adoption of Bt maize and  
39 economic surplus generated by Bt maize.

40

41 Based on economic surplus, the results suggest that refuge requirements should remain the  
42 foundation of resistance management and mitigation for high-dose Bt maize technologies.  
43 For shorter planning horizons (< 16 years), resistance mitigation strategies did not improve  
44 economic surplus from Bt maize. Social networks accelerated the emergence of resistance,  
45 making the optimal policy intervention for longer planning horizons rely more on increased

46 refuge requirements and less on insecticidal sprays targeting resistant pest populations.  
47 Overall, the importance social factors play in these results implies more social science  
48 research, including agent-based models, would contribute to developing better policies to  
49 address the evolution of pest resistance.

50

## 51 Author Summary

52 Bt maize has been a valuable technology used by farmers for more than two decades to  
53 control pest damage to crops. Using Bt maize, however, leads to pest populations evolving  
54 resistance to Bt toxins so that benefits decrease. As a result, managing and mitigating  
55 resistance has been a serious concern for policymakers balancing the current and future  
56 benefits for many stakeholders. While the evolution of insect resistance is a biological  
57 phenomenon, human activities also play key roles in agricultural landscapes with active pest  
58 management, yet social science research on resistance management and mitigation policies  
59 has generally lagged biological research. Hence, to evaluate policy options for resistance  
60 mitigation for this complex biological and social system, we build an agent-based model that  
61 integrates key social factors into insect ecology in a spatially and dynamically explicit way.  
62 We demonstrate the significance of social factors, particularly social networks. Based on an  
63 economic surplus criterion, our results suggest that refuge requirements should remain the  
64 foundation of resistance mitigation policies for high-dose Bt technologies, rather than  
65 localized bans, areawide insecticide sprays, or taxes on Bt maize seed.

66

## 67 Introduction

68 Globally, farmers have planted more than 2.3 billion hectares of genetically engineered crops  
69 since their commercial introduction in 1996, including a new maximum of 190 million  
70 hectares in 2017 [1]. Focusing on maize (*Zea mays*), the world's leading grain crop with  
71 annual production exceeding a billion metric tons, the United States, Brazil and Argentina  
72 together produced almost half of the world's supply in 2017 [2]. Bt maize – maize genetically  
73 engineered to produce *Bacillus thuringiensis* (Bt) toxins in plant tissues for insect control –  
74 accounted for more than 80% of the maize planted in each of these three nations in 2017 [1].  
75 After more than two decades of commercial use of genetically engineered crops, insect  
76 resistance to Bt toxins continues to be a major concern around the world [3]. A high-  
77 dose/refuge resistance management strategy continues to be the primary policy in multiple  
78 nations for delaying resistance to these Bt toxins [4–6]. Nevertheless, field-evolved  
79 resistance to some of these Bt toxins has been documented for populations of western corn  
80 rootworm (*Diabrotica virgifera virgifera*) in the United States and various lepidopteran  
81 species in multiple locations [7].

82

83 The commercialization of Bt crops has generated a variety of research, including  
84 bioeconomic models that integrate population genetics and pest ecology with farmer  
85 economic returns [8–10]. Though these models contributed to the development of insect  
86 resistance management policies, little other work exists on the role of social factors in the  
87 evolution of insect resistance to commercialized toxins. Insect resistance to these toxins  
88 evolves in response to human management activities, activities driven by a variety of social  
89 factors that include not only economic considerations, but also sociological, psychological,

90 cultural, historical and political considerations [11]. As a result, examining genetic and  
91 ecological processes in isolation from these broader social factors driving human behavior  
92 potentially misses key determinants of the evolution of insect resistance. Hence, a broader,  
93 complex systems model of insect resistance management that incorporates both biological  
94 and social processes can potentially provide new insights [12].

95

96 In the United States (US), the Environmental Protection Agency (EPA) required companies  
97 commercializing Bt crops to develop resistance mitigation plans as a condition for product  
98 registration [13]. Once a resistant population has been officially documented according to  
99 the EPA process, these resistance mitigation plans generally restrict the availability of the  
100 technology (Bt seed) in and around the region where the resistant population emerges.  
101 Though resistant insect populations and field failures in the US have been documented in the  
102 scientific literature [7,14], the official EPA criteria have yet to trigger implementation of  
103 these mitigation plans for any pest. Instead, the EPA has required a more generalized  
104 response by Bt crop registrants [15]. Interestingly, little research exists that evaluates and  
105 compares the mitigation plans that have been filed or other mitigation policies, particularly  
106 from an economic perspective. Given the length of time that Bt crops have been in use in the  
107 US and elsewhere, insect resistance is likely to become an increasing problem, making more  
108 research on mitigation responses and strategies especially timely.

109

110 This paper has two goals. First, we develop an agent-based model of insect resistance to Bt  
111 maize that incorporates farmer adoption behavior. We then use the model to compare  
112 different mitigation policies in order to inform policymakers and other stakeholders of the

113 types of programs that are likely to generate the largest economic benefits for society.  
114 Second, focusing specifically on the impact of social networks on farmer adoption behavior,  
115 we show that social factors can also play a key role in the evolution of insect resistance to Bt  
116 toxins in agricultural cropping systems.

117

118 Agent-based modeling has become more widely-used for studying complex systems and  
119 emergent behavior, including socio-ecological modeling of insect resistance management  
120 [16,17]. In agent-based models, an observed macroscopic phenomenon emerges as a result  
121 of interaction among heterogeneous agents in a dynamically evolving environment. Agents  
122 typically follow simple decision rules and influence each other either directly or indirectly  
123 through the environment, which itself evolves according to its own rules and agent actions.  
124 Because the processes being explicitly modeled are complex, researchers use computer  
125 simulations to examine outcomes over a wide range of parameter values. In short, agent-  
126 based models are laboratory experiments conducted *in silico* [17,18]. Despite the remaining  
127 challenges to overcome, such as ad hoc assumptions and lack of relevant data for validation  
128 [19–21], agent-based modeling can provide insights into complex systems that would be  
129 difficult to study otherwise. Given the merits, applications of agent-based models to pest and  
130 resistance management in agricultural systems have been developed [22–24].

131

132 Although agent-based models can integrate many factors, they still face the fundamental  
133 tradeoff in modeling: fidelity to the phenomenon being examined and abstraction for ease of  
134 analysis and interpretation [17]. This paper focuses on deriving new insights into policy  
135 options for mitigating insect resistance once it has evolved, and emphasizes the significance

136 of social factors for questions relevant to policymakers [22]. As a result, social components  
137 are richer than existing models that use individual-based modeling to incorporate social  
138 factors [25], while the biological aspects of the model are simpler than other models focusing  
139 on biological processes [26–28].

140

141 We extend existing work [25] on insect resistance management for Bt crops by more fully  
142 leveraging the power of agent-based modeling. First, we explicitly model the local influence  
143 that neighbors have on farmers through social networks as they make decisions regarding  
144 adoption of Bt maize, creating a hybrid decision process that mixes both individual profit  
145 considerations and a desire to mimic neighbors. Second, we allow the additional cost of  
146 planting Bt seed to vary over time, because this cost influences adoption decisions and  
147 companies have reduced the cost of single-toxin Bt seed to encourage farmers to continue to  
148 plant Bt maize in the face of pest population suppression [29]. With this pricing flexibility,  
149 we calibrate the farmer decision model using historical data that reflects these decreasing  
150 prices, and then can examine the impact of a tax on Bt seed as a policy option for mitigating  
151 resistance.

152

153 For this analysis, we parameterize a bioeconomic model of maize production with the option  
154 to use high-dose Bt maize to manage European corn borer (*Ostrinia nubilalis*). We calibrate  
155 the Bt maize adoption model using aggregate historical adoption data for farmers in the state  
156 of Wisconsin. Through the calibration process, we emphasize the significant role that a social  
157 factor – the local influence of social networks on Bt maize adoption [30] – can play in the  
158 evolution of insect resistance. Using the calibrated model, we then simulate a number of

159 mitigation policies implemented either over the entire landscape or around the areas where  
160 resistance develops. In particular, we consider combinations of an increased refuge  
161 requirement and a tax on the sale of Bt seed for all farms, and a ban on the use of Bt maize  
162 and areawide use of an additional insecticide to control the pest in the area around where  
163 resistance emerges. To assess the relative performance of each policy, we use economic  
164 surplus as a monetary measure of the social value generated by the use of Bt maize and  
165 conduct sensitivity analysis of key parameters to explore the robustness of model results.

166

## 167 Results

### 168 Baseline Results

169 Running the calibrated model 1,000 times with different random seeds and averaging over  
170 these iterations gave baseline results for the insect population, the Bt seed adoption rate,  
171 and the resistance (R) allele frequency at the landscape level. In the model, periods 0 to 10  
172 were an initialization phase, periods 11 to 32 were a calibration phase corresponding to  
173 years 1996 to 2017, and periods 33 to 60 were projections (see Model). The baseline model  
174 captured the aggregate Bt adoption rate of Wisconsin farmers by calibrating two parameters  
175 that determined Bt maize adoption – farmer responsiveness to profit incentives and the  
176 farmer tendency to mimic the adoption decisions of neighbors due to social network effects.  
177 The calibrated model reproduced the previously noted oscillation of the European corn  
178 borer population before the advent of Bt maize [31], and the documented suppression of the  
179 pest population due to the widespread farmer adoption of Bt maize in Wisconsin and other  
180 states [32]. As expected, the calibrated model projected a surge in the R-allele frequency as



181 the insect resistance developed, resulting in the eventual recovery of the pest population.  
182 Baseline results suggested that period 33 was the beginning of a significant increase in the  
183 R-allele frequency. In period 33, the R-allele frequency was 4.1%, but rose quickly, exceeding  
184 10% in period 36, 20% in period 38, 30% in period 39, 40% in period 40 and 50% in period  
185 41. The pest population did not recover until later, with the average density not exceeding  
186 0.5 larvae per plant until period 50.

187

## 188 Policy Experiments

189 We simulated policies to mitigate resistance to the Bt toxin once it emerged. Refuge  
190 requirements have been the lynch pin of resistance management, and so the mitigation  
191 policies we examined began with increasing refuge requirements. In addition, building on  
192 the model's capacity for capturing the complexity from the interaction of biological and  
193 social factors, we experimented with combinations of three other types of mitigation  
194 policies: localized bans on the use of Bt maize around areas where resistance emerged,  
195 areawide applications of other insecticides to control the pest around areas where resistance  
196 emerged, and a uniform tax on the sale of Bt seed for all farmers buying it. Refuge policies  
197 and localized bans directly regulate the use of Bt maize, areawide spray policies directly  
198 manage resistant pest populations, and the Bt seed tax adjusts farmer incentives to use Bt  
199 maize. The simulation of resistance mitigation policies was a combination of different  
200 assumptions for these four policy parameters: the refuge requirement, localized bans,  
201 areawide management, and a Bt seed tax.

202

203 The simulated landscape consisted of a grid of fields, with 44% of fields assigned randomly  
204 to maize production initially and the remainder to non-maize. Fields remained in their initial  
205 allocation throughout a simulation, but were reassigned for each simulation. During a  
206 simulation, insect resistance was declared when the R-allele frequency exceeded 50% in the  
207 pest population in a field after Bt toxin mortality and before pest dispersal occurred. The  
208 50% threshold was chosen because at this level the landscape-average pest population  
209 began to increase (Fig 1), implying that higher population densities were occurring in some  
210 fields due to resistance. For resistance mitigation, the refuge requirement was increased  
211 from the baseline of 5% to either 20% or 50% for all farmers on the landscape planting Bt  
212 maize, with complete compliance achieved using seed mixtures. The localized ban was  
213 imposed only on farms within a radius  $r$  of any field where resistance was declared, again  
214 with complete compliance assumed. We considered two radii: once and twice the distance  
215 of adult dispersal from the natal field ( $r = 1 \times \text{dispersal}$ ,  $r = 2 \times \text{dispersal}$ ). Conceptually, this  
216 ban was a 100% refuge requirement applied locally and dynamically imposed and lifted  
217 according to the situation in the previous period. For areawide management, a non-Bt  
218 insecticide was applied in the period when resistance was declared, either covering only the  
219 field of resistance or all maize fields in a neighborhood around the field within the distance  
220 of adult dispersal ( $r = 0 \times \text{dispersal}$ ,  $r = 1 \times \text{dispersal}$ ). We assumed 100% compliance with the  
221 insecticide application for all fields within this area and that the application reduced the pest  
222 population by 80% after Bt toxin mortality and increased farmer costs by  $\$33.51 \text{ ha}^{-1}$ . This  
223 cost was based on published survey averages for active ingredient and application costs and  
224 adjusted for inflation to 2017 equivalents [33,34]. Finally, the tax policy increased the Bt  
225 seed cost by 25% or 50% for all farmers on the landscape for all periods after resistance was

226 declared. In brief, each policy parameter had the following three levels: refuge requirement  
227 (5%, 20%, 50%), localized ban (none,  $r = 1 \times \text{dispersal}$ ,  $r = 2 \times \text{dispersal}$ ), areawide spray (none,  
228  $r = 0 \times \text{dispersal}$ ,  $r = 1 \times \text{dispersal}$ ), and Bt seed tax (0%, 25%, 50%). Three levels for each of  
229 these four policy parameters created  $3^4 = 81$  mitigation policy combinations to simulate.

230

231 **Fig 1. Baseline results from the calibrated model.** It contains the insect population  
232 density (Insect), Bt seed adoption rate (Bt), and the resistance allele frequency (R) (results  
233 for each period are averages over 1,000 simulations).

234

235 The calibrated model was run 1,000 times for each policy and, just as for the baseline, the  
236 following three results variables were averaged over all 1,000 iterations for each period:  
237 aggregate farmer adoption of Bt maize, population-level R-allele frequency, and average pest  
238 population density for the landscape. In addition, as a performance metric to compare each  
239 policy, we approximated economic surplus each period as the sum of farmer profits and the  
240 technology fees collected by the seed company, divided by the total number of farmers.

241

242 Costs for spraying insecticides were subtracted from farmer profits for those making  
243 applications, while collected taxes were subtracted from farmer profits, but added to the  
244 economic surplus (i.e., the tax was a surplus transfer, not a surplus loss). To simplify the  
245 analysis, we did not discount future surpluses. Each policy scenario began after the  
246 calibration phase (i.e., at period 33), and the cumulative surplus was evaluated for each  
247 length of planning horizon ranging from 1 to 25 years (i.e., periods 33 to 57).

248

249 To build intuition about the nature of each policy treatment (i.e. refuge, tax, spray, and ban),  
250 we first report results for each policy individually (not combinations of policies) by plotting  
251 the dynamics for Bt adoption, the R-allele frequency, and the pest population density (Fig 2–  
252 Fig 4). In Fig 2 (Bt adoption), results for the ban policy (Ban 1x) are plotted with a separate  
253 vertical axis due to its qualitatively different and much stronger effect than for the other  
254 policies. Also, results for the spray policy with  $r = 1 \times$  dispersal (Spray 1x) and the ban policy  
255 with  $r = 2 \times$  dispersal (Ban 2x) are omitted as they were very similar to those with smaller  
256 radii. In total, Fig 2 plots the Bt adoption rate against the planning horizon for the following  
257 policies: baseline (Baseline), 20% refuge (20% Refuge), 50% refuge (50% Refuge), 25% seed  
258 tax (25% Tax), 50% seed tax (50% Tax), areawide spray in the field with resistance (Spray 0x)  
259 and a localized ban on Bt seed within one pest dispersal radius of the field with resistance  
260 (Ban 1x). Consistent with Fig 1, the baseline policy showed a continuing increase in Bt maize  
261 adoption from planning horizon year 0 (period 32 in Fig 1), with a peak of almost 86.5% in  
262 planning horizon year 9 (period 41 in Fig 1). All policies showed this same general trend  
263 (with one exception), but with a lower adoption peak occurring sooner for the seed tax  
264 policies, a higher adoption peak occurring later for the increased refuge policies (especially  
265 for 50% refuge), and a slightly higher and later peak occurring for the areawide spray  
266 policies. The one exception were localized bans the sale of Bt seed, for which implementation  
267 caused a rapid decline in the use of Bt maize, with almost complete dis-adoption by the end  
268 of the simulation in horizon period 25.

269

270 **Fig 2. Bt adoption rate under single policies plotted against the planning horizon.** The  
271 results for each period are averages over 1,000 simulations.

272

273 In Fig 3 (R-allele frequency), results for both tax policies are omitted as they were almost  
274 identical to the results for the baseline, suggesting low policy efficacy. This result was  
275 surprising because Bt adoption differs noticeably for these policies (Fig 2). All mitigation  
276 policies plotted in Fig 3 slowed the development of resistance compared to the baseline. The  
277 most effective mitigation policies were the 50% refuge for all farms (50% Refuge) and a  
278 localized ban on and around fields with resistance (Ban 1x), both of which kept the R-allele  
279 frequency below 20% for more than 20 years. By horizon period 25, however, the 50%  
280 refuge policy showed a rapid increase in the R-allele frequency, suggesting its failure, while  
281 the ban policy kept the frequency below 20%, suggesting that it was the most effective policy  
282 for mitigating resistance over the long-run (>25 years). The 20% refuge for all farms (20%  
283 Refuge) effectively mitigated the resistance for about 10 years, and then the R-allele  
284 frequency began a rapid increase, reaching the baseline level by horizon period 25. The spray  
285 policies (Spray 0x) were not particularly effective for mitigating resistance, showing a steady  
286 increase in the R-allele frequency, though slower than for the baseline and tax policies.

287

288 **Fig 3. R-allele frequency under single policies plotted against the planning horizon.**

289 The results for each period are averages over 1,000 simulations.

290

291 In Fig 4 (pest population density), results for both tax policies are again omitted as they were  
292 almost identical to results for the baseline. The areawide spray policy (Spray 0x) kept the  
293 pest population density low over all 25 years, even with a radius = 0, due to the efficacy of  
294 the insecticide spray. The baseline with no intervention to mitigate resistance kept the pest

295 population density low for about 15 years, and then the population increased and began to  
296 oscillate as expected. Surprisingly, the refuge policies showed distinctly different patterns  
297 over the 25 years. The 20% refuge policy (20% Refuge) kept the pest population low for about  
298 20 years (about 5 years longer than the baseline), while the 50% refuge (50% Refuge) showed  
299 a long slowly increasing pest population density over all 25 years, exceeding the baseline in  
300 year 17 and the 20% refuge policy in year 23. Interestingly, the ban policy (Ban 1x) only kept  
301 the pest population low for about 10 years (about 5 years longer than the baseline).

302

303 **Fig 4. Insect population density under simple policies plotted against the planning**  
304 **horizon.** The results for each period are averages over 1,000 simulations.

305

306 These results showed the tradeoffs inherent in the mitigation of resistance. For example, the  
307 50% refuge and ban policies were both the most effective at reducing the frequency of  
308 resistance alleles (Fig 3), but came at the cost of reduced adoption of Bt maize (Fig 2) and  
309 higher average pest populations (Fig 4), both implying lower benefits. Hence, we used  
310 economic surplus as a measure that integrates across costs and benefits in order to compare  
311 mitigation policies and to develop recommendations.

312

313 Fig 5 plots average annual economic surplus against the planning horizon, again omitting  
314 results for the tax policies as they were almost identical to baseline results. Each point on the  
315 curves in Fig 5 is an annualized average of the accumulated surplus over the corresponding  
316 planning horizon, i.e., the sum of landscape surplus over the planning horizon, divided by the  
317 number of years in the planning horizon and the maize planted area. As seen in Fig 5, the

318 baseline (5% refuge, no localized ban, no areawide spray, no Bt seed tax) generated the  
319 greatest average annual surplus for all planning horizons up to 15 years. This result occurred  
320 because the surplus measure was cumulative, and the baseline policy accumulated more  
321 surplus during the early years than the other policies. However, for planning horizons of 16  
322 or more years, the optimal mitigation policy increased the refuge requirement from 5% to  
323 20% for all farms, but did not impose a localized ban, an areawide spray, or Bt seed tax. The  
324 areawide spray was suboptimal due to the additional costs incurred by farmers, while the  
325 ban policy was sub-optimal due to the loss of Bt maize benefits for farmers and the lost  
326 revenue for the seed company. Interestingly, the 50% refuge policy generated the lowest  
327 economic surplus – though it was one of the most effective mitigation policies, its cost in  
328 terms of lost benefits to farmers was too high. Recall that results for the two omitted tax  
329 policies (25% Tax, 50% Tax) were almost identical to the baseline.

330

331 **Fig 5. Average annual surplus for different mitigation policies plotted against the**  
332 **planning horizon.**

333

334 Because the results in Fig 5 did not include combinations of mitigation policies, Table 1  
335 summarizes results over the 81 policy combinations evaluated. Three combinations  
336 emerged as optimal for some length of planning horizon. For a planning horizon of 1 to 15  
337 years, the baseline policy (5% refuge, no localized ban, no areawide spray, no Bt seed tax)  
338 continued to be optimal even as resistance increased. For a planning horizon of 16 to 22  
339 years, the optimal policy increased the refuge requirement from 5% to 20%, but did not  
340 impose a localized ban, an areawide spray, or Bt seed tax. For a planning horizon of 23 to 25

341 years, technically adding the 50% tax to the 20% refuge requirement was optimal, but the  
342 increase in economic surplus was trivial (<0.05%). Therefore, our economic surplus  
343 criterion suggested that the optimal resistance mitigation policy was no intervention if a  
344 shorter ( $\leq 15$  years) planning horizon was used and, if a longer ( $\geq 16$  years) planning horizon  
345 was used, increasing the required refuge to 20% for all farmers when resistance emerged.  
346 Because mitigation policies that increased the required refuge decreased current benefits to  
347 achieve increased future benefits, discounting implies that the 20% and 50% refuge policies  
348 would have generated less surplus than plotted in Fig 5. Calculations showed that, with a  
349 13% or higher discount rate, the no-intervention baseline remained the optimal policy for  
350 all planning horizons less than or equal to 25 years.

351 **Table 1. Optimal policy combination by length of optimization period**

| Length of<br>Optimization Period | Refuge<br>Requirement | Localized<br>Ban | Areawide<br>Spray | Bt Seed Tax |
|----------------------------------|-----------------------|------------------|-------------------|-------------|
| 1-15                             | 5%                    | None             | None              | 0%          |
| 16-22                            | 20%                   | None             | None              | 0%          |
| 23-25                            | 20%                   | None             | None              | 50%         |

352

353

354 We also investigated the distribution of surplus shares under three resistance mitigation  
355 policies: the baseline (with a 5% refuge), a 20% refuge for all farmers planting Bt maize, and  
356 both a 20% refuge and a 50% Bt seed tax for all farmers planting Bt maize. Recall that  
357 economic surplus was the sum of farmer profit, the technology fee collected by the company  
358 and tax revenue and that adding the Bt seed tax as a mitigation policy had little impact on



359 surplus with a 20% refuge requirement. For the baseline, farmers and the companies roughly  
360 divided the surplus evenly as yield gains and technology fees (Fig S1). Increasing the refuge  
361 requirement from the baseline of 5% to 20% to mitigate resistance increased the company  
362 share of surplus by about 5 to 10 percentage points, with the farmer share falling to about  
363 40% (Fig S1). Adding a 50% Bt seed tax on top of the 20% refuge requirement to mitigate  
364 resistance, the tax burden was borne more by the companies, with their share declining by  
365 about 15 percentage points to 45% of the surplus, while farmers received about 35% of the  
366 surplus and tax revenue accounts for about 20% of the surplus.

367

#### 368 Role of Social Networks

369 To highlight the difference created by incorporating the effects of social networks, Fig 6 and  
370 Fig Fig 7 show results with all parameters the same as for the baseline except that the model  
371 was recalibrated with social networks “shut off” by setting the parameter  $q = 1$ . In this case,  
372 farmers made Bt maize adoption decisions based only on their individual expected profitably,  
373 giving no weight to their neighbors’ decisions. In terms of Bt maize adoption, without the  
374 effect of social networks, the farmer adoption rate grew faster first, but then slowed and  
375 eventually declined from period 43 onward (Fig 6). This result was explained by the lack of  
376 social network effects. Without them, profitable adoption by early adopters was not slowed  
377 by neighboring non-adopters. Similarly, as the technology became less effective due to  
378 resistance, profit-motivated dis-adoption of Bt maize was not slowed by neighbors’ inertia.  
379 As a consequence of the lower usage of Bt maize, the R-allele frequency reached key levels  
380 later than for the baseline. Specifically, the R-allele frequency did not exceed 10% until  
381 period 42, 20% until period 45, 30% until period 46, 40% until period 47, and 50% until

382 period 48, or about 7 years later than for the baseline. Hence, not including the effects of  
383 social networks on farmer adoption of Bt maize slowed the estimated evolution of resistance  
384 by about 7 years.

385

386 **Fig 6. Results from the calibrated model without social network effects.** It contains the  
387 insect population density (Insect), Bt seed adoption rate (Bt), and the resistance allele  
388 frequency (R) for the calibrated model without social network effects. The results for each  
389 period are averages over 1,000 simulations.

390

391 **Fig 7. Average annual surplus for different mitigation policies.** Each is plotted against  
392 the planning horizon for the calibrated model without social network effects.

393

394 Fig 7 plots average annual economic surplus against the planning horizon with the effect of  
395 social networks on adoption “shut off.” Again, results for the tax policies were omitted as  
396 they were almost identical to baseline results. Compared to Fig 5, which incorporated the  
397 effects of social networks on adoption, Fig 7 shows that all mitigation policies generated  
398 essentially the same surplus for the first 6 or 7 years. Because mitigation policies were not  
399 implemented until the R-allele frequency exceeded a 50% threshold, the slower projected  
400 evolution of resistance without social networks effects delayed policy implementation, so  
401 that all policies were initially equivalent.

402

403 Based on Fig 7, the optimal policy depended on the planning horizon and varied from Fig 5.

404 The baseline again generated the greatest average annual surplus for all planning horizons

405 up to 17 years (about the same as in Fig 5). Again, the 20% refuge for all farmers was the  
406 optimal mitigation policy for longer planning horizons, but only for the narrow range from  
407 18 to 20 years. Furthermore, the difference between the baseline (with 5% refuge) and the  
408 20% refuge mitigation policy was much smaller than in Fig 5. However, just as in Fig 5, the  
409 50% refuge policy generated among the lowest amounts of economic surplus. Interestingly,  
410 for planning horizons exceeding 20 years, the areawide spray policy became optimal, which  
411 did not occur in Fig 5. This result occurred because without social network effects, farmers  
412 more quickly dis-adopted Bt maize when resistance developed, thus avoiding the higher  
413 costs of the spray policy and lower Bt maize benefits, and so they generated higher surplus.  
414 Again, the ban policy generated the lowest economic surplus over many planning horizons,  
415 even with the more rapid dis-adoption of Bt maize when resistance developed.

416

417 Because the results in Fig 7 did not include combinations of mitigation policies, Table 2  
418 summarizes results over the 81 policy combinations evaluated, just as Table 1 did for Fig 5.  
419 Without social network effects, farmer adoption of Bt maize only responded to individual  
420 profitability, which created some shifts in the optimal mitigation policy. Three policy  
421 combinations again emerged as optimal for some length of planning horizon. For a planning  
422 horizon of 1 to 17 years, the baseline policy continued to be optimal even as resistance  
423 increased, and for a planning horizon of 18 to 19 years, the optimal policy increased the  
424 refuge requirement from 5% to 20%. These were the same policies as when the effects of  
425 social networks were included, but the planning horizons changed to be slightly longer for  
426 the baseline policy and shorter for the 20% refuge policy (Table 1). The greatest change  
427 without social network effects was for the longest planning horizons. For a 20- to 25-year

428 planning horizon, the optimal resistance mitigation policy was to reduce the refuge  
429 requirement back to 5% for all farmers, to add a 50% Bt maize seed tax on all farmers, and  
430 to make areawide insecticide applications in areas where resistance emerged. With social  
431 network effects and longer planning horizons of 22 to 25 years, the refuge remained at 20%  
432 and only the 50% Bt seed tax was added (Table 1). The greater responsiveness of farmers to  
433 individual profitability without social network effects made more active mitigation policies  
434 optimal, but only for longer planning horizons. However, the effect was not large, as again  
435 calculations showed that with a 9% or higher discount rate, the no-intervention baseline  
436 remained the optimal policy for all planning horizons less than 25 years.

437 **Table 2. Optimal policy combination by length of optimization period without social**  
438 **network effects**

| Length of<br>Optimization Period | Refuge<br>Requirement | Localized<br>Ban | Areawide<br>Spray | Bt Seed Tax |
|----------------------------------|-----------------------|------------------|-------------------|-------------|
| 1-17                             | 5%                    | None             | None              | 0%          |
| 18-19                            | 20%                   | None             | None              | 0%          |
| 20-25                            | 5%                    | None             | r = 0             | 50%         |

439

## 440 Discussion

441 Research on insect resistance mitigation strategies and empirical applications of agent-  
442 based models to pest and resistance management are limited [22–24]. Hence, as part of this  
443 paper’s first goal, we demonstrated the capacity of an agent-based model to produce results  
444 of use by policymakers and other stakeholders, specifically examining resistance mitigation

445 policies for Bt maize and the European corn borer and the role of social networks in Bt maize  
446 adoption. We evaluated 81 resistance mitigation policies that combined three levels of four  
447 policies (non-Bt maize refuge, areawide non-Bt insecticide sprays, localized Bt maize bans,  
448 Bt maize seed tax) implemented when and/or where resistance emerged. These  
449 combinations showed variation in projected dynamics for Bt maize adoption, resistance  
450 allele frequency in the pest population, and the average pest population density.

451  
452 From a biological perspective focused on keeping the frequency of resistance alleles in the  
453 pest population low, the most effective mitigation policies were a 50% refuge requirement  
454 for all farms when resistance emerged on the landscape and a localized ban on planting Bt  
455 maize within one radius of adult dispersal of farms with resistance. Bringing a broader  
456 economic perspective that balanced costs and benefits, we used economic surplus (the sum  
457 of farmer profit from maize production, company technology fees from selling Bt maize seed,  
458 and any tax revenue collected) to identify recommended mitigation policies. Surprisingly,  
459 results showed that when resistance emerged, the optimal response in terms of maximizing  
460 economic surplus was making no policy changes, but continuing the current resistance  
461 management policy of 5% non-Bt refuge, with no requirement of insecticidal sprays or  
462 localized Bt maize bans in and around areas of resistance, or Bt seed taxes when resistance  
463 emerges. For planning horizons beyond 16 years it became optimal to increase refuge  
464 requirements to 20% for all farmers when resistance developed. Furthermore, for planning  
465 horizons beyond 22 years it became optimal to add a 50% tax on all Bt maize seed sold when  
466 resistance developed in addition to the 20% refuge requirement. These results show the

467 impacts that incorporating broader social science perspectives into resistance management  
468 or mitigation can have on recommended policy responses.

469

470 Several caveats apply to these results, as models cannot avoid the fundamental tradeoff  
471 between fidelity to the phenomenon examined and abstraction for ease of analysis and  
472 interpretation. Baseline results assume one single-toxin Bt maize producing a high dose of  
473 the toxin. However, multiple single-toxin Bt maize hybrids with different modes of action  
474 have been commercialized in the US, and single-toxin Bt maize hybrids have been phased out  
475 as companies have shifted to Bt maize hybrids with multiple, pyramided traits [35].  
476 Furthermore, refuge requirements in the Midwest have changed over time for the different  
477 Bt maize hybrids. Initial requirements were for 20% non-Bt maize as structured refuge, but  
478 more recently, some Bt maize hybrids with pyramided traits have a 5% or 10% refuge  
479 requirement implemented as a seed mix and/or structured refuge [35,36]. Our model does  
480 not capture the use of multiple toxins entering the market at different times, overlapping use  
481 of hybrids with multiple, pyramided traits at the same time by neighboring farmers, or  
482 changes in refuge requirements and methods of implementation. In addition, our model  
483 assumes that Bt maize delivers a high dose of the toxin, which is accurate for European corn  
484 borer, but not for other lepidopteran pests such as corn earworm (*Helicoverpa zea*) or Bt  
485 maize for corn rootworm [14,37,38]. Furthermore, the model focuses on a single pest,  
486 though farmers simultaneously manage multiple pests with varying levels of control by  
487 different Bt maize hybrids [39]. In addition, the model assumes a single selection by the Bt  
488 toxin each year, while many target pests, including the European corn borer, have multiple  
489 generations per season with more than one selection event by Bt maize [39]. Also, economic

490 surplus is not a complete measure of social benefits [40]. For example, as used here, it does  
491 not include environmental impacts of insect management, even though a significant benefit  
492 of Bt maize is that farmers use it as a substitute for conventional insecticides [41–43].

493

494 With these caveats, the policy experiments reported here suggest that refuge requirements  
495 remain the foundation of resistance mitigation for high-dose technologies, just as they are  
496 for resistance management. Based on maximizing social surplus, the optimal policy to  
497 mitigate resistance when it emerges was to maintain the current refuge requirement or to  
498 modestly increase it for all farmers, rather than to implement localized bans on the sale of Bt  
499 maize in areas where resistance develops or to make areawide applications of insecticidal  
500 sprays on resistant populations. Based on the economic surplus criterion, the benefits of  
501 lower resistance allele frequency for these policies did not adequately compensate for the  
502 added costs or loss of the benefits from using Bt maize. Taxes on the sale of Bt maize seed  
503 did not cause surplus to differ substantially from the baseline policy, suggesting a possible  
504 mechanism to fund various programs to improve Bt maize use, such as development of  
505 educational materials and outreach or research activities. However, the results showed that  
506 companies bear a large share of these costs, suggesting that it would be more efficient for  
507 companies to directly fund these programs based on seed sales rather than creating a seed  
508 tax program to fund them. Also, as a caveat, this model did not incorporate the Bt technology  
509 market. As a result, for example, the model did not include market competition among  
510 companies via differentiated traits, including different regulatory requirements, as, for  
511 example, companies would lobby to not have their hybrids included in tax schemes if  
512 resistance developed to a competitor's Bt maize.

513

514 As a secondary goal of this paper, we demonstrated that social factors can play key roles in  
515 the development and management of insect resistance, focusing on the effect that social  
516 networks can play on farmer adoption of Bt maize. As modeled here, adoption depended in  
517 part on the average adoption of a farmer's neighbors, not just each farmer's expected  
518 profitability, as a way to capture the effects of information exchange, integration of multiple  
519 farmers' experiences with pests and adoption, shared local institutions and markets, and  
520 similar factors. Modeling the mechanisms for this social network and the specific  
521 connections among individual farmers is beyond the scope of this analysis. Relative to a  
522 model in which farmers responded only to their individual profitability, social networks as  
523 modeled here impeded farmer responsiveness to profitability signals, which slowed the  
524 initial adoption of Bt maize and its dis-adoption as pest populations declined or resistance  
525 developed. Model calibration to observed state-level adoption rates identified model  
526 parameters and reduced differences in initial adoption rates with and without social  
527 networks. However, this calibrated model implied a relatively slower adjustment in Bt maize  
528 use by farmers. As a result, when including social network effects, our model projected that  
529 resistance develops about 7 years earlier than without social network effects and the optimal  
530 mitigation policy more strongly favored use of moderate increases in refuge for all farmers.  
531 Resistance developed earlier because farmers uses Bt maize more intensely since they did  
532 not dis-adopt Bt maize as pest populations declined and resistance developed, even though  
533 the profitability of Bt maize decreased. With social network effects, the optimal resistance  
534 mitigation policy also more strongly favored use of modest increases in refuge because more  
535 farmers continued to use Bt maize and obtain its benefits relative to more costly, but effective,



536 policies such as areawide sprays or localized bans. In this example, ignoring social network  
537 effects could contribute to making inappropriate policy recommendations for managing pest  
538 resistance or mitigating it once it develops.

539

540 The intensity and extent of farmer adoption of Bt maize plays a key role in the management  
541 and mitigation of pest resistance. This agent-based model incorporated the influence of  
542 social factors by having individual farmer adoption respond to expected profitability and the  
543 adoption behavior of neighboring farmers. However, many social factors not addressed by  
544 this model also affect adoption. For example, expected profitability depends not only on all  
545 the market factors driving maize prices, but also technology markets and the pricing  
546 behavior of firms selling Bt maize [29]. Similarly, farmers adopt Bt maize not only for  
547 expected profit, but also to manage income risk [44,45]. Also, social networks for agricultural  
548 management rarely have the simple spatial structure assumed here, but typically have  
549 varying nodes of importance such as key crop consultants, retailers, and extension agents  
550 [30,46]. In addition, social factors affect resistance through more than just adoption of Bt  
551 maize, such as through farmer compliance with resistance management and mitigation  
552 practices and how Bt maize affects broader cropping systems such as crop rotations [10,11].  
553 Overall, our results demonstrate that social factors can play an important role in resistance  
554 management and mitigation. However, more applied and quantitative social science  
555 research would contribute to developing better policy recommendations for resistance  
556 management and mitigation, and agent-based models can be a part of this contribution.

557

## 558 Model

### 559 Landscape

560 The spatially explicit model used a 30×70 grid space representing the cropland in Wisconsin.  
561 Modeled farmers mimic the Wisconsin crop landscape [47] and plant 44% of the fields to  
562 maize, the host crop for the pest. Fields maintain their initial random assignment to maize  
563 or non-maize production during a simulation, but are reassigned at the start of each new  
564 simulation. During a simulation, maize farmers decide adoption of Bt maize each period. Fig  
565 8 depicts a typical model landscape, in this case with 90% Bt adoption and a resistance allele  
566 frequency of 51% for the total population. A circle (○) represents a farmer who plants  
567 conventional (non-Bt) maize, whereas a black dot (●) represents a farmer who adopts Bt  
568 maize. A light-gray background (■□) indicates that the pest population in an individual field  
569 before adult dispersal has a resistance allele frequency of more than 50%, the criterion used  
570 for declaring that a population is resistant [48]. To avoid boundary effects, top fields wrap to  
571 corresponding bottom fields and left-most fields to corresponding right-most fields, creating  
572 a torus, implying that the model space is part of a larger landscape with comparable  
573 dynamics occurring for the pest population and its genetic structure [28].

574

575 **Fig 8. Example model landscape.** Circle (○) represents a field planted to non-Bt maize,  
576 black dot (●) represents a field planted to Bt maize, and light-gray (■□) indicates a field  
577 with a pest population with a resistance allele frequency of more than 50% before adult  
578 dispersal.

579

## 580 Pest Population Genetics

581 The pest population-genetics model is parametrized for European corn borer (*Ostrinia*  
582 *nubilalis*), a major pest for Midwestern maize and the primary target for initial commercial  
583 releases of Bt maize beginning in 1996 [32]. The insect model uses discrete time steps  
584 corresponding to distinct generations and consistent with the seasonality of many types of  
585 crop production and pest life cycles. *O. nubilalis* typically has two generations per year in the  
586 major US maize production region, though northern regions may have only one generation  
587 per year and southern regions may have three or more [39]. The model simplifies these  
588 dynamics to one discrete time step per year that aggregates population dynamics and genetic  
589 selection across these generations. Hutchison et al. [32] used a comparable empirical  
590 approach to estimate annual population growth rates for *O. nubilalis* using annual  
591 observations of second-generation adult population densities in Minnesota and Wisconsin.

592

593 Historically, the *O. nubilalis* population in the Midwestern US has oscillated with an  
594 approximately seven year cycle [49] largely due to the entomopathogenic parasite *Nosema*  
595 *pyrausta* [31]. Field data for second-generation populations in Wisconsin over 1944-1995  
596 show an average peak and trough for the oscillation of about 1.2 and 0.2 larvae per plant  
597 [31,32]. The population model approximates these dynamics using a lagged logistic growth  
598 model:

$$599 \quad N_{t+1} = gN_t \left(1 - \frac{N_{t-1}}{K}\right) \#(1)$$

600 where  $N_t$  is the second-generation larval population (larvae per maize plant),  $g$  is the annual  
601 growth rate and  $K$  is the carrying capacity. Using  $g = 2.15$  and  $K = 1.4$  generates a reasonable  
602 approximation of historical *O. nubilalis* population dynamics in Wisconsin, with a similar  
603 range of population minimums and maximums as observed and six or seven years between  
604 peaks.

605  
606 The genetics model assumes two alleles,  $R$  for resistant and  $S$  for susceptible, creating three  
607 genotypes, homozygous resistant  $RR$ , homozygous susceptible  $SS$ , and heterozygous  $RS$ , with  
608 respective Bt toxin larval survival rates of 1.0, 0.0, and 0.18. Each period, after Bt toxin  
609 mortality and density-dependent mortality for larvae, random mating occurs among the  
610 adult population within each field before adult dispersal. Note that, with random mating,  $RR$   
611 and  $RS$  genotypes both contribute  $R$  alleles, but  $RS$  genotypes do so half as often on average,  
612 also contributing  $S$  alleles just as often. Let  $\alpha_t$ ,  $\beta_t$ , and  $\gamma_t$  respectively denote the relative  
613 frequencies in period  $t$  of  $RR$ ,  $SS$ , and  $RS$  genotypes, which by definition sum to 1. Random  
614 mating then implies  $1 = \alpha_{t+1} + \beta_{t+1} + \gamma_{t+1} = (\alpha_t + \beta_t + \gamma_t)^2 = (\alpha_t + 0.5\gamma_t)^2 +$   
615  $(\beta_t + 0.5\gamma_t)^2 + 2(\alpha_t + 0.5\gamma_t)(\beta_t + 0.5\gamma_t)$ , so that

$$\begin{aligned} \alpha_{t+1} &= (\alpha_t + 0.5\gamma_t)^2, \\ \beta_{t+1} &= (\beta_t + 0.5\gamma_t)^2, \\ \gamma_{t+1} &= 2(\alpha_t + 0.5\gamma_t)(\beta_t + 0.5\gamma_t). \end{aligned} \quad \#(2)$$

616  
617  
618 Adults disperse uniformly within a radius  $r$  of maize fields (i.e. not onto non-maize fields).  
619 The literature provides a range of observations for dispersal, with dispersal in most cases  
620 taking place within 20km and depending on various factors (season, gender, mating status).

621 To capture the effects of dispersal yet remain computationally tractable, the model uses a  
622 dispersal radius of 15km, which corresponds to 3 fields in the model grid space. We assume  
623 that the natal field is always available as a destination, which implies that if no neighboring  
624 fields exist within the dispersal range, adults stay in the same field.

625

## 626 Farmer Behavior

627 Individual farmers manage each field and decide each period whether to plant Bt or non-Bt  
628 maize. A number of economic and social factors influence farmers' adoption decisions for Bt  
629 maize [50]. Rather than explicitly enumerating and modeling these multiple factors, agent-  
630 based models combine simple behavioral models with suitable random components and let  
631 complex phenomenon emerge [18]. Though expected profitability greatly influences farmer  
632 management decisions in commercial agriculture, their local social networks also  
633 significantly influence their behaviors, not just by providing additional information  
634 regarding the relative profitability of different practices [30,46,51]. Therefore, we model the  
635 Bt adoption process as a hybrid of individual profit maximization and local imitation to  
636 capture the effect of social networks.

637

## 638 Farmer Profit

639 The profit-based component of farmer behavior uses the following switching function [25]:

$$640 \Pr(\text{Switch } C \text{ to } A) = \begin{cases} 1 - \exp[-\rho(\pi_A - \pi_C)] & \text{if } \pi_A > \pi_C \\ 0 & \text{otherwise} \end{cases} \#(3)$$

641 Here,  $\pi_A$  is the profitability of the alternative choice and  $\pi_C$  is the profitability of the current  
642 choice, with both profits calculated using the pest population density for the previous period

643 in the field. The function determines the probability that the farmer switches from the  
644 current choice to the alternative (*Switch C to A*), with the probability increasing as the  
645 alternative becomes relatively more profitable than the current choice. We use a “soft”  
646 probabilistic switching decision to capture the effect of other unobserved individual factors  
647 [39]. The parameter  $\rho$  captures the responsiveness of farmer adoption to profitability  
648 differences, with a greater  $\rho$  increasing the probability farmers use the more profitable  
649 alternative. As explained in the Calibration section, we calibrate  $\rho$  against the Bt seed  
650 adoption data for Wisconsin to derive  $\rho = 0.0023$ . The negative-exponential function implies  
651 that the switching probability is the farmers’ expected utility gain from switching when the  
652 gain is uncertain, assuming constant absolute risk aversion for the farmer, a commonly used  
653 assumption for empirical analysis [52,53].

654

655 Farmer profit for a field ( $\pi$ ) is crop revenue minus cost, where revenue declines as the pest  
656 population increases and cost varies with the scenario:

$$657 \quad \pi = PY(1 - Loss(N)) - Cost. \#(4)$$

658 Here  $P$  is crop price (\$ Mg<sup>-1</sup>),  $Y$  is potential or pest-free crop yield (Mg ha<sup>-1</sup>),  $Loss$  is  
659 proportional crop loss, which depends on  $N$ , the average pest population density (larvae per  
660 plant), and  $Cost$  is the production cost (\$ ha<sup>-1</sup>). To focus on factors other than annual  
661 variability in crop prices and yields, crop price and potential yield are fixed at reported  
662 averages in 2017 for Wisconsin farmers:  $P = \$129.91 \text{ ha}^{-1}$  and  $Y = 10.92 \text{ Mg ha}^{-1}$  [54]. These  
663 values imply constant potential revenue of \$1,418.62 ha<sup>-1</sup> across fields and seasons. The  
664 proportion of potential revenue lost due to pest damage depends on the average larval  
665 population density based on an empirical model [44]:  $Loss(N) = 0.1186N^{0.5146}$ .

666

667 *Cost* consists of a base cost  $C$  (\$ ha<sup>-1</sup>) that does not vary by policy scenario and costs that do:

$$668 \quad Cost = \begin{cases} C + T(1 - \theta)(1 + \tau) + C_s & \text{if Bt maize} \\ C + C_s & \text{if non - Bt maize} \end{cases} \quad \#(5)$$

669 Based on US Department of Agriculture crop budgets [55], the base cost  $C$  is set to \$1,202.51

670 ha<sup>-1</sup>, the reported average for 2017 in the region containing Wisconsin for all costs except

671 opportunity costs for land and operator labor and management.  $T$  (\$ ha<sup>-1</sup>) is the additional

672 seed cost for Bt maize (“technology fee”), which varies over time based on the function

673 estimated with Wisconsin market data [27]. Specially,  $T = \$17.49$  ha<sup>-1</sup> from 1996 to 2003,

674 and then declines to  $T = \$17.45$  ha<sup>-1</sup> for 2004, \$15.78 ha<sup>-1</sup> for 2006, \$13.75 ha<sup>-1</sup> for 2007,

675 \$11.41 ha<sup>-1</sup> for 2008, \$9.18 ha<sup>-1</sup> for 2009, \$8.29 ha<sup>-1</sup> for 2010, \$7.82 ha<sup>-1</sup> for 2011, \$7.39 ha<sup>-1</sup>

676 for 2012, and then remains at a base of \$7.04 ha<sup>-1</sup> for years 2013 and afterward. The

677 remaining cost parameters vary with the policy scenario:  $\theta$  is the proportion of refuge (non-

678 Bt maize) planted with Bt maize,  $\tau$  is the tax rate for Bt maize, and  $C_s$  is the cost (\$ ha<sup>-1</sup>) for a

679 foliar insecticidal spray as part of areawide management of adults. Each scenario sets these

680 cost parameters at appropriate values as described in the Policy Experiments section. For

681 example, a refuge only scenario sets  $\tau = C_s = 0$  and sets  $\theta$  at 0.05, 0.20 or 0.50; a ban only

682 scenario sets  $\tau = C_s = 0$  and  $\theta = 1$  (100% refuge) in fields where a ban is in effect; and an

683 areawide spray policy sets  $\tau = 0$  and imposes the cost  $C_s$  for all affected fields. The cost of an

684 insecticidal spray  $C_s$  is \$33.51 ha<sup>-1</sup> based on published survey averages for insecticide active

685 ingredients used in maize and application costs, adjusted for inflation to 2017 equivalents

686 [33,34].

687

## 688 Social Network

689 Network analysis has been widely applied to understand the diffusion of innovations as a  
690 social phenomenon, including in agriculture [56,57]. Neighboring farmers have been shown  
691 to create a local environment that affects individual farmer adoption decisions, both for  
692 hybrid maize seed and for Bt maize [30,58]. To capture this social network effect, the model  
693 assumes each farmer in a field is connected to farmers in neighboring fields, with the size of  
694 the neighborhood determined by a “radius”. Fig 9 shows an example of a size-2  
695 neighborhood for a farmer with nine neighbors who plant maize, either Bt or non-Bt. Those  
696 neighbors themselves have their own neighborhoods, with each connection undirected so  
697 that the local social networks are tightly overlapped. The number of neighbors for a size- $n$   
698 neighborhood can range from 0 to a maximum of  $4n(n + 1)$ . With no data for social network  
699 sizes for farmers, and considering that  $n = 3$  gives up to 48 neighbors (implying a substantial  
700 computational burden), the model randomly assigns neighborhood sizes to each farmer for  
701 all seasons using a uniform distribution over  $\{0, 1, 2\}$ .

702

703 **Fig 9. Example size-2 neighborhood.** It is centered on a farmer ( $\times$ ) with nine neighbors  
704 who plant maize, either Bt maize ( $\bullet$ ) or non-Bt maize ( $\circ$ ).

705

706 Given this local social network, each maize farmer chooses each season to grow either Bt or  
707 non-Bt maize for a field. A parameter  $q$  defines the impact of social networks on farmer  
708 adoption decisions. With probability  $q$ , a farmer focuses solely on individual profits using the  
709 switching function and with probability  $1 - q$  follows the majority choice of his neighbors in



710 the previous season. For example, if the farmer in Fig 9 follows the majority, he plants Bt  
711 maize next season because his neighborhood has 5 Bt maize adopters and 4 non-adopters.  
712 In the case of a tie, he chooses Bt maize as well. Also, one-third of the farmers randomly have  
713 a size-0 neighborhood ( $n = 0$ ) and so, with no social network, always use the switching  
714 function. As a result, the probability that a farmer uses the switching function is  $q + \frac{1}{3}(1 - q)$ ,  
715 while the probability that a farmer has a size-1 neighborhood is  $\frac{1}{3}(1 - q)$ , which is also the  
716 probability that a farmer has a size-2 neighborhood. Thus, the model has two calibration  
717 parameters for Bt maize adoption:  $q$  defining the impact of social networks and  $\rho$  defining  
718 the responsiveness of farmers to profit in the switching function.

719  
720 Lastly, a refuge policy is implemented as a fixed proportion  $\theta$  of non-Bt maize with complete  
721 compliance by farmers, the so-called “refuge in a bag” [59] in which the company mixes Bt  
722 and non-Bt maize seeds before purchase. In our model, the refuge requirement has two  
723 effects. First, the effective seed cost is the proportion  $(1 - \theta)$  of the technology fee  $T$  at that  
724 period. Second, the effective survival rate of each genotype is calculated as the weighted  
725 average:  $\theta + (1 - \theta)s$ , where  $s$  is the original survival rate. That is, with probability  $\theta$ , any  
726 genotype survives due to the non-Bt maize, and with probability  $1 - \theta$ , each genotype  
727 survives according to its Bt toxin survival rate. Initially, we assume  $\theta = 0.05$ , which is the  
728 lowest refuge requirement already in place, and later increased refuge levels are examined  
729 as resistance mitigation policies.

730

## 731 Running the Model

732 Each model run begins with initialization, including randomly placing farmers across the  
733 landscape. Since corn fields occupy roughly 44% of total farmland in Wisconsin (represented  
734 by  $30 \times 70$  fields configured as a torus), the total number of maize farmers for a run is  
735 approximately  $0.44 \times 30 \times 70 = 924$ . After initialization, the run proceeds period by period,  
736 with a period corresponding to a growing season or year. Before introducing Bt maize into  
737 the model, the insect module runs for 11 periods, which corresponds to the pre-Bt periods  
738 and helps stabilize the model's biological dynamics. Thereafter, the model simultaneously  
739 updates the pest population density of each field for each period. First, Bt toxin effects reduce  
740 each field's pest population based on the survival rates of the genotypes established there  
741 the previous season. Second, mating determines the genotype composition of the next  
742 generation based on random mating of the population in the field. Third, reproduction  
743 determines the pest population density based on the lagged logistic growth model. Fourth,  
744 the population locally re-mixes across fields based on the dispersal model. Finally, maize  
745 farmers simultaneously make planting decisions (whether to plant Bt or non-Bt maize) for  
746 the next period based on the farmer behavioral model. In short, during a growing season the  
747 Bt toxin (if present) reduces the natal population in a field, survivors randomly mate and  
748 produce the next generation, which then disperses locally across fields, and then farmers  
749 make maize planting decisions for the following spring.

750

## 751 Calibration

752 We used aggregate Bt maize adoption data for Wisconsin to calibrate the model. Our  
753 calibration minimized the average of the mean squared error (MSE) of prediction for the

754 simulated landscape compared to the observed data. Specifically, the MSE for a run was the  
755 squared deviation of the simulated Bt adoption rate from the annual Wisconsin adoption  
756 data, averaged across all periods with adoption data ( $t = 11$  to 32). Since runs were random,  
757 the MSEs were averaged across 1,000 runs. The two calibration parameters were the  
758 responsiveness of farmers to expected profit differences between alternatives ( $\rho$ ) and the  
759 probability ( $q$ ) that farmers focus solely on profit differences to make adoption decisions,  
760 rather than their neighbors' choices. To avoid both over-fitting and excessive  
761 computational requirements, a grid search was used with increments of 0.0002 for  $\rho$  and of  
762 0.1 for  $q$ . To highlight the significance of local networks, we also calibrated the model by  
763 fixing  $q = 1$  and using only  $\rho$ , which "shut off" all social network effects on adoption.

764  
765 Plotting the Wisconsin Bt maize adoption data and both calibration fits shows the superior  
766 fitting of the two-parameter hybrid model relative to the one-parameter model (Fig 10).  
767 Using the same random seeds for both models, the optimum solutions are  $\rho = 0.0036$  and  
768  $q = 0.3$  for the hybrid model and  $\rho = 0.0022$  for the single parameter model. These optimal  
769 values for the two-parameter model imply that 70% of the years, farmers follow the majority  
770 choice of their neighborhood, suggesting that network effects are important for  
771 understanding farmer adoption dynamics for Bt maize.

772  
773 **Fig 10. Aggregate adoption of Bt maize in Wisconsin and two simulated results.** The  
774 simulated results are generated by calibrating one parameter and two-parameters.

775

776

## 777 Acknowledgments

778 We wish to acknowledge the financial support of the U.S Department of Agriculture National  
779 Institute for Food and Agriculture's Agriculture and Food Research Initiative (grant number  
780 2014-67023-21814 awarded to TMH and PDM, [https://nifa.usda.gov/program/agriculture-](https://nifa.usda.gov/program/agriculture-and-food-research-initiative-afri)  
781 [and-food-research-initiative-afri](https://nifa.usda.gov/program/agriculture-and-food-research-initiative-afri)) and Monsanto's Corn Rootworm Knowledge Research  
782 Program (grant awarded to PDM and TMH: [https://monsanto.com/products/product-](https://monsanto.com/products/product-stewardship/corn-rootworm-management/corn-rootworm-knowledge-research-program/)  
783 [stewardship/corn-rootworm-management/corn-rootworm-knowledge-research-](https://monsanto.com/products/product-stewardship/corn-rootworm-management/corn-rootworm-knowledge-research-program/)  
784 [program/](https://monsanto.com/products/product-stewardship/corn-rootworm-management/corn-rootworm-knowledge-research-program/). The funders had no role in study design, data collection and analysis, decision to  
785 publish, or preparation of the manuscript.

786

## 787 References

- 788 1. ISAAA. Global Status of Commercialized Biotech/GM Crops in 2017: Biotech Crop  
789 Adoption Surges as Economic Benefits Accumulate in 22 Years. Ithaca, NY: ISAAA;  
790 2017. (ISAAA Brief). Report No.: 53.
- 791 2. USDA. World Agricultural Supply and Demand Estimates [Internet]. Washington, DC;  
792 2018. (WASDE). Report No.: 581. Available from:  
793 <https://www.usda.gov/oce/commodity/wasde/>
- 794 3. Tabashnik BE. ABCs of Insect Resistance to Bt. PLOS Genet. 2015 Nov  
795 19;11(11):e1005646.
- 796 4. Huang F, Andow DA, Buschman LL. Success of the high-dose/refuge resistance  
797 management strategy after 15 years of Bt crop use in North America. Entomol Exp  
798 Appl. 2011 Jul 1;140(1):1–16.
- 799 5. Pardo-López L, Soberón M, Bravo A. Bacillus thuringiensis insecticidal three-domain  
800 Cry toxins: mode of action, insect resistance and consequences for crop protection.  
801 FEMS Microbiol Rev. 2013 Jan 1;37(1):3–22.
- 802 6. Tabashnik BE, Brévault T, Carrière Y. Insect resistance to Bt crops: lessons from the  
803 first billion acres. Nat Biotechnol. 2013 Jun;31(6):510–21.
- 804 7. Gassmann AJ, Petzold-Maxwell JL, Keweshan RS, Dunbar MW. Field-Evolved  
805 Resistance to Bt Maize by Western Corn Rootworm. PLOS ONE. 2011 Jul  
806 29;6(7):e22629.

- 807 8. Hurley TM, Babcock BA, Hellmich RL. Bt corn and insect resistance: an economic  
808 assessment of refuges. *J Agric Resour Econ*. 2001;26(1):176.
- 809 9. Crowder D, Onstad D, Gray M, Mitchell P, Spencer J, Brazee R. Economic analysis of  
810 dynamic management strategies utilizing transgenic corn for control of western corn  
811 rootworm (Coleoptera: Chrysomelidae). *J Econ Entomol*. 2005;98(3):961–75.
- 812 10. Mitchell PD, Onstad DW. Effect of extended diapause on evolution of resistance to  
813 transgenic *Bacillus thuringiensis* corn by northern corn rootworm (Coleoptera:  
814 Chrysomelidae). *J Econ Entomol*. 2005;98(6):2220–2234.
- 815 11. Hurley TM, Mitchell PD. Insect Resistance Management: Adoption and Compliance. In:  
816 Onstad DW, editor. *Insect Resistance Management*. 2nd ed. San Diego: Academic Press;  
817 2014. p. 421–51.
- 818 12. Rebaudo F, Dangles O. An agent-based modeling framework for integrated pest  
819 management dissemination programs. *Environ Model Softw*. 2013 Jul 1;45:141–9.
- 820 13. USDA. Biopesticides Re-registration Action Documents: Cry1Ab and Cry1F *Bacillus*  
821 *thuringiensis* (Bt) Corn Plant-Incorporated Protectants. Washington, DC; 2010.
- 822 14. Gassmann AJ, Petzold-Maxwell JL, Clifton EH, Dunbar MW, Hoffmann AM, Ingber DA, et  
823 al. Field-evolved resistance by western corn rootworm to multiple *Bacillus*  
824 *thuringiensis* toxins in transgenic maize. *Proc Natl Acad Sci*. 2014;201317179.

- 825 15. Andow DA, Pueppke SG, Schaafsma AW, Gassmann AJ, Sappington TW, Meinke LJ, et al.  
826 Early Detection and Mitigation of Resistance to Bt Maize by Western Corn Rootworm  
827 (Coleoptera: Chrysomelidae). *J Econ Entomol.* 2016 Feb 1;109(1):1–12.
- 828 16. Miller JH, Page SE. *Complex adaptive systems: An introduction to computational*  
829 *models of social life.* Princeton university press; 2009.
- 830 17. Peck SL. Simulation as experiment: a philosophical reassessment for biological  
831 modeling. *Trends Ecol Evol.* 2004 Oct 1;19(10):530–4.
- 832 18. Epstein JM. *Generative social science: Studies in agent-based computational modeling.*  
833 Princeton University Press; 2006.
- 834 19. Durlauf SN. Complexity, economics, and public policy. *Polit Philos Econ.* 2012 Feb  
835 1;11(1):45–75.
- 836 20. Filatova T, Verburg PH, Parker DC, Stannard CA. Spatial agent-based models for socio-  
837 ecological systems: Challenges and prospects. *Environ Model Softw.* 2013 Jul 1;45:1–7.
- 838 21. Feola G, Binder CR. Towards an improved understanding of farmers' behaviour: The  
839 integrative agent-centred (IAC) framework. *Ecol Econ.* 2010 Oct 15;69(12):2323–33.
- 840 22. Renton M. Shifting focus from the population to the individual as a way forward in  
841 understanding, predicting and managing the complexities of evolution of resistance to  
842 pesticides. *Pest Manag Sci.* 2013;69(2):171–5.
- 843 23. Renton M, Busi R, Neve P, Thornby D, Vila-Aiub M. Herbicide resistance modelling:  
844 past, present and future. *Pest Manag Sci.* 2014;70(9):1394–404.

- 845 24. Gay P-E, Lecoq M, Piou C. Improving preventive locust management: insights from a  
846 multi-agent model. *Pest Manag Sci.* 2017;74(1):46–58.
- 847 25. Milne AE, Bell JR, Hutchison WD, van den Bosch F, Mitchell PD, Crowder D, et al. The  
848 effect of farmers' decisions on pest control with Bt crops: a billion dollar game of  
849 strategy. *PLOS Comput Biol.* 2015;11(12).
- 850 26. Ives AR, Paull C, Hulthen A, Downes S, Andow DA, Haygood R, et al. Spatio-Temporal  
851 Variation in Landscape Composition May Speed Resistance Evolution of Pests to Bt  
852 Crops. *PLOS ONE.* 2017 Jan 3;12(1):e0169167.
- 853 27. Onstad DW, Meinke LJ. Modeling Evolution of *Diabrotica Virgifera Virgifera*  
854 (Coleoptera: Chrysomelidae) to Transgenic Corn with Two Insecticidal Traits. *J Econ*  
855 *Entomol.* 2010 May 31;103(3):849–60.
- 856 28. Storer NP. A spatially explicit model simulating western corn rootworm (Coleoptera:  
857 Chrysomelidae) adaptation to insect-resistant maize. *J Econ Entomol.*  
858 2003;96(5):1530–1547.
- 859 29. Shi G, Chavas J, Stiegert K. An Analysis of the Pricing of Traits in the U.S. Corn Seed  
860 Market. *Am J Agric Econ.* 2010 Oct 1;92(5):1324–38.
- 861 30. Kaup BZ. The reflexive producer: The influence of farmer knowledge upon the use of  
862 Bt corn. *Rural Sociol.* 2008;73(1):62.



- 863 31. Bell JR, Burkness EC, Milne AE, Onstad DW, Abrahamson M, Hamilton KL, et al. Putting  
864 the brakes on a cycle: bottom-up effects damp cycle amplitude: Managing epidemic  
865 persistence. *Ecol Lett*. 2012 Apr;15(4):310–8.
- 866 32. Hutchison WD, Burkness EC, Mitchell PD, Moon RD, Leslie TW, Fleischer SJ, et al.  
867 Areawide Suppression of European Corn Borer with Bt Maize Reaps Savings to Non-Bt  
868 Maize Growers. *Science*. 2010 Oct 8;330(6001):222–5.
- 869 33. Mitchell PD. Methods and assumptions for estimating the impact of pyrethroid  
870 insecticides on pest management practices and costs for U.S. crop farmers [Internet].  
871 Madison, WI: AgInfomatics; 2017. Available from:  
872 <http://aginfomatics.com/pyrethroids-project.html>
- 873 34. USDA. Agricultural Prices [Internet]. 2018. Available from:  
874 <https://usda.library.cornell.edu/concern/publications/c821gj76b>
- 875 35. Hurley TM, Sun H. Softening Shock and Awe Pest Management in Corn and Soybean  
876 Production with IPM Principles. *J Integr Pest Manag*. 2019;10(1):7.
- 877 36. U.S. Environmental Protection Agency. Insect Resistance Management for Bt Plant-  
878 Incorporated Protectants [Internet]. 2019 [cited 2019 Jun 13]. Available from:  
879 [https://www.epa.gov/regulation-biotechnology-under-tsca-and-fifra/insect-](https://www.epa.gov/regulation-biotechnology-under-tsca-and-fifra/insect-resistance-management-bt-plant-incorporated)  
880 [resistance-management-bt-plant-incorporated](https://www.epa.gov/regulation-biotechnology-under-tsca-and-fifra/insect-resistance-management-bt-plant-incorporated)
- 881 37. U.S. Environmental Protection Agency. White Paper on Resistance in Lepidopteran  
882 Pests of *Bacillus thuringiensis* (Bt) Plant-Incorporated Protectants in the United States

- 883 [Internet]. 2018. Available from: <https://www.epa.gov/sites/production/files/2018->  
884 [07/documents/position\\_paper\\_07132018.pdf](https://www.epa.gov/sites/production/files/2018-07/documents/position_paper_07132018.pdf)
- 885 38. Burkness EC, Dively G, Patton T, Morey AC, Hutchison WD. Novel Vip3A *Bacillus*  
886 *thuringiensis* (Bt) maize approaches high-dose efficacy against *Helicoverpa zea*  
887 (Lepidoptera: Noctuidae) under field conditions: Implications for resistance  
888 management. *GM Crops*. 2010;1(5):337–43.
- 889 39. Mason CE, Rice ME, Calvin DD, Van Duyn JW, Showers WB, Hutchison WD, et al.  
890 European Corn Borer Ecology and Management. Iowa State University; 1996. (North  
891 Central Regional Extension Publication). Report No.: 327.
- 892 40. Mitchell PD, Brown Z, McRoberts N. Economic issues to consider for gene drives. *J*  
893 *Responsible Innov*. 2018;5(sup1):S180–202.
- 894 41. Perry ED, Ciliberto F, Hennessy DA, Moschini G. Genetically engineered crops and  
895 pesticide use in US maize and soybeans. *Sci Adv*. 2016;2(8):e1600850.
- 896 42. Catarino R, Areal F, Park J, Parisey N. Spatially explicit economic effects of non-  
897 susceptible pests' invasion on Bt maize. *Agric Syst*. 2019;175:22–33.
- 898 43. Brookes G. Twenty-one years of using insect resistant (GM) maize in Spain and  
899 Portugal: farm-level economic and environmental contributions. *GM Crops Food*.  
900 2019;1–12.
- 901 44. Hurley TM, Mitchell PD, Rice ME. Risk and the value of Bt corn. *Am J Agric Econ*.  
902 2004;86(2):345–358.

- 903 45. Shi G, Chavas J-P, Lauer J. Commercialized transgenic traits, maize productivity and  
904 yield risk. *Nat Biotechnol.* 2013;31(2):111.
- 905 46. Lubell M, Fulton A. Local policy networks and agricultural watershed management. *J*  
906 *Public Adm Res Theory.* 2007;18(4):673–96.
- 907 47. USDA. Census of agriculture [Internet]. 2012. Available from:  
908 <https://www.agcensus.usda.gov/Publications/2012/>
- 909 48. Tabashnik BE. Delaying insect resistance to transgenic crops. *Proc Natl Acad Sci.* 2008  
910 Dec 9;105(49):19029–30.
- 911 49. Onstad DW, Maddox JV. Modeling the effects of the microsporidium, *Nosema pyrausta*,  
912 on the population dynamics of the insect, *Ostrinia nubilalis*). *J Invertebr Pathol.*  
913 1989;53(3):410–21.
- 914 50. Useche P, Barham BL, Foltz JD. Integrating Technology Traits and Producer  
915 Heterogeneity: A Mixed-Multinomial Model of Genetically Modified Corn Adoption. *Am*  
916 *J Agric Econ.* 2009 May 1;91(2):444–61.
- 917 51. McAllister R, Robinson C, Maclean K, Guerrero A, Collins K, Taylor B, et al. From local  
918 to central: a network analysis of who manages plant pest and disease outbreaks across  
919 scales. *Ecol Soc.* 2015;20(1).
- 920 52. Chavas J-P. Risk analysis in theory and practice. Academic Press; 2004.
- 921 53. Mitchell PD, Hutchison WD. Decision making and economic risk in IPM. In: Radcliffe  
922 EB, Cancelado RE, Hutchison WD, editors. *Integrated Pest Management: Concepts,*

- 923 Tactics, Strategies and Case Studies [Internet]. Cambridge: Cambridge University  
924 Press; 2008. p. 33–50. Available from:  
925 [https://www.cambridge.org/core/books/integrated-pest-management/decision-](https://www.cambridge.org/core/books/integrated-pest-management/decision-making-and-economic-risk-in-ipm/1B17130CD5A60148EA1057C0B1ECE4AF)  
926 [making-and-economic-risk-in-ipm/1B17130CD5A60148EA1057C0B1ECE4AF](https://www.cambridge.org/core/books/integrated-pest-management/decision-making-and-economic-risk-in-ipm/1B17130CD5A60148EA1057C0B1ECE4AF)
- 927 54. USDA. Quick Stats Lite [Internet]. 2019. Available from:  
928 [https://www.nass.usda.gov/Quick\\_Stats/Lite/](https://www.nass.usda.gov/Quick_Stats/Lite/)
- 929 55. USDA. Commodity Costs and Returns [Internet]. 2016 [cited 2016 Oct 28]. Available  
930 from: [http://www.ers.usda.gov/data-products/commodity-costs-and-](http://www.ers.usda.gov/data-products/commodity-costs-and-returns/commodity-costs-and-returns/#Recent%20Costs%20and%20Returns%3A%20Corn)  
931 [returns/commodity-costs-and-returns/#Recent Costs and Returns: Corn](http://www.ers.usda.gov/data-products/commodity-costs-and-returns/commodity-costs-and-returns/#Recent Costs and Returns: Corn)
- 932 56. Easley D, Kleinberg J. Networks, crowds, and markets: Reasoning about a highly  
933 connected world. Cambridge University Press; 2010.
- 934 57. Jackson MO. Social and economic networks. Vol. 3. Princeton university press; 2010.
- 935 58. Ryan B, Gross NC. The diffusion of hybrid seed corn in two Iowa communities. Rural  
936 Sociol. 1943;8(1):15.
- 937 59. Hodgson E. Refuge in a Bag is Here: Explaining the Simplified Refuge [Internet]. 2010  
938 [cited 2018 Jul 17]. Available from:  
939 [https://crops.extension.iastate.edu/cropnews/2010/06/refuge-bag-here-explaining-](https://crops.extension.iastate.edu/cropnews/2010/06/refuge-bag-here-explaining-simplified-refuge)  
940 [simplified-refuge](https://crops.extension.iastate.edu/cropnews/2010/06/refuge-bag-here-explaining-simplified-refuge)
- 941
- 942

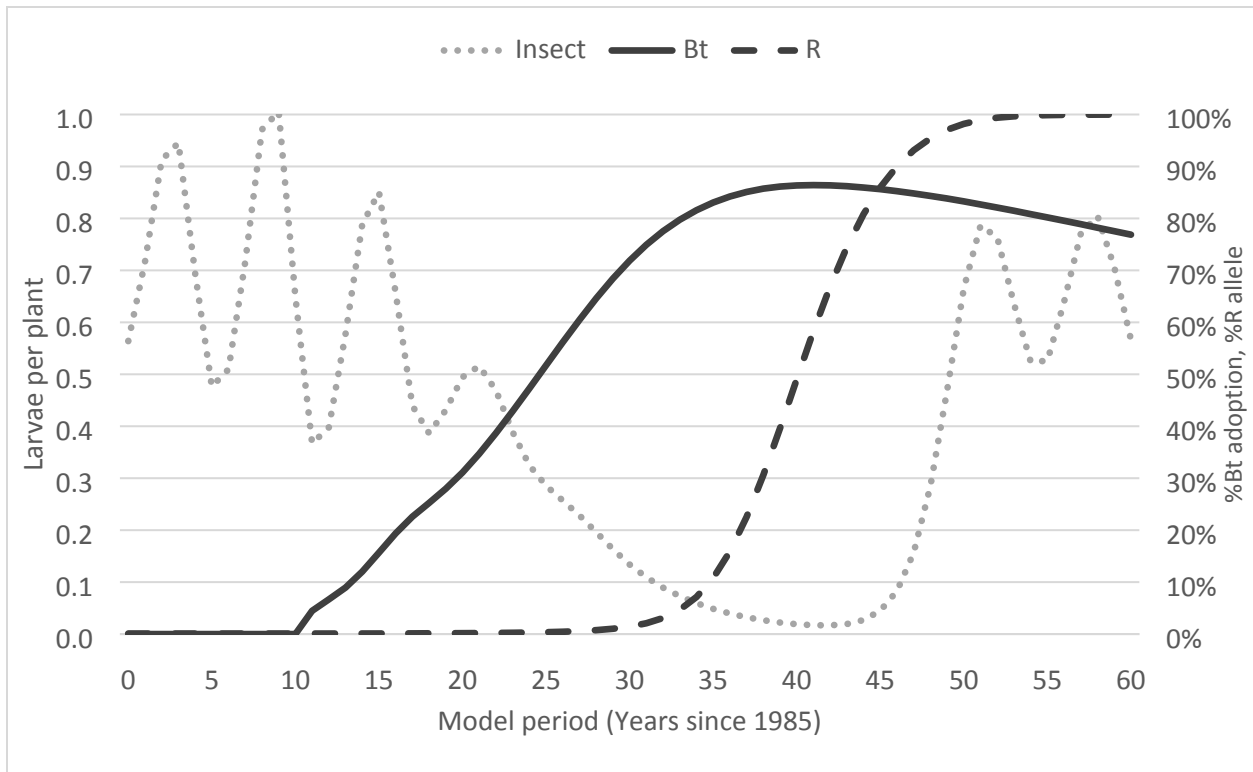

943

944 **Fig 1. Baseline results from the calibrated model.** It contains the insect population  
945 density (Insect), Bt seed adoption rate (Bt), and the resistance allele frequency (R) (results  
946 for each period are averages over 1,000 simulations).

947

948

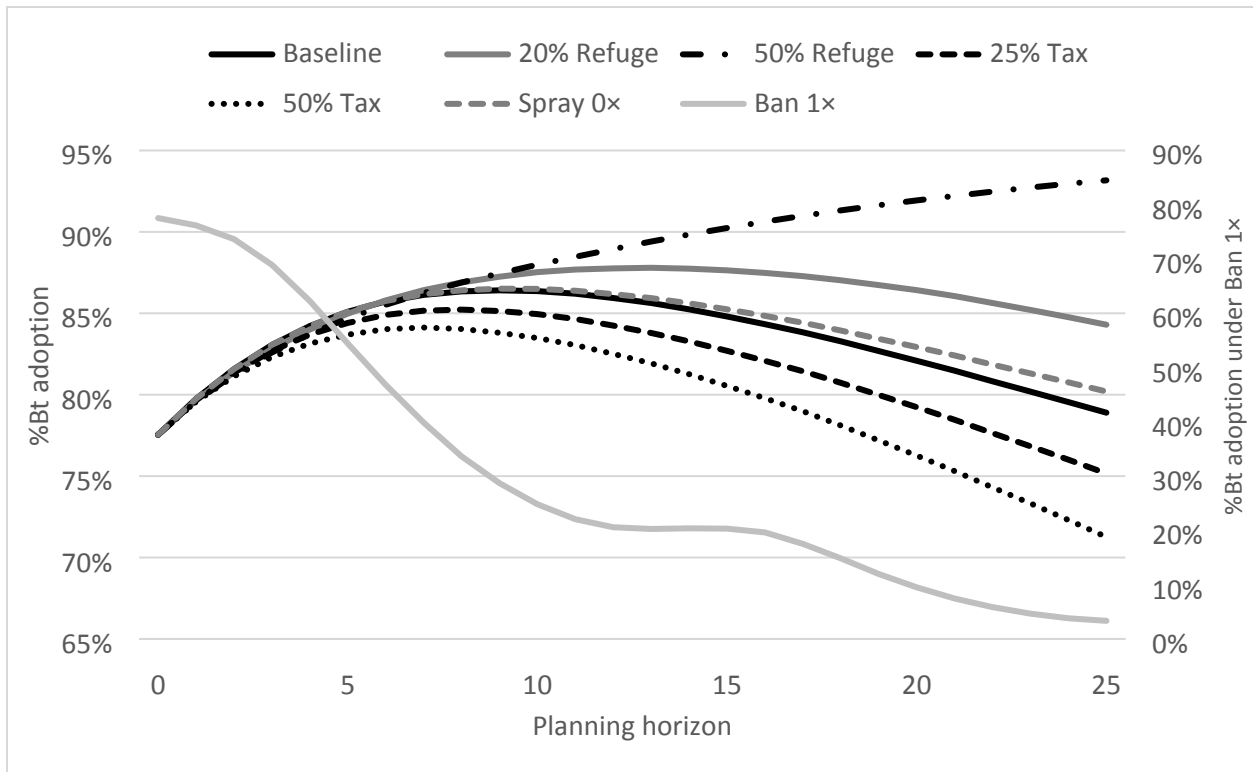

949

950 **Fig 2. Bt adoption rate under single policies plotted against the planning horizon. The**

951 results for each period are averages over 1,000 simulations.

952

953

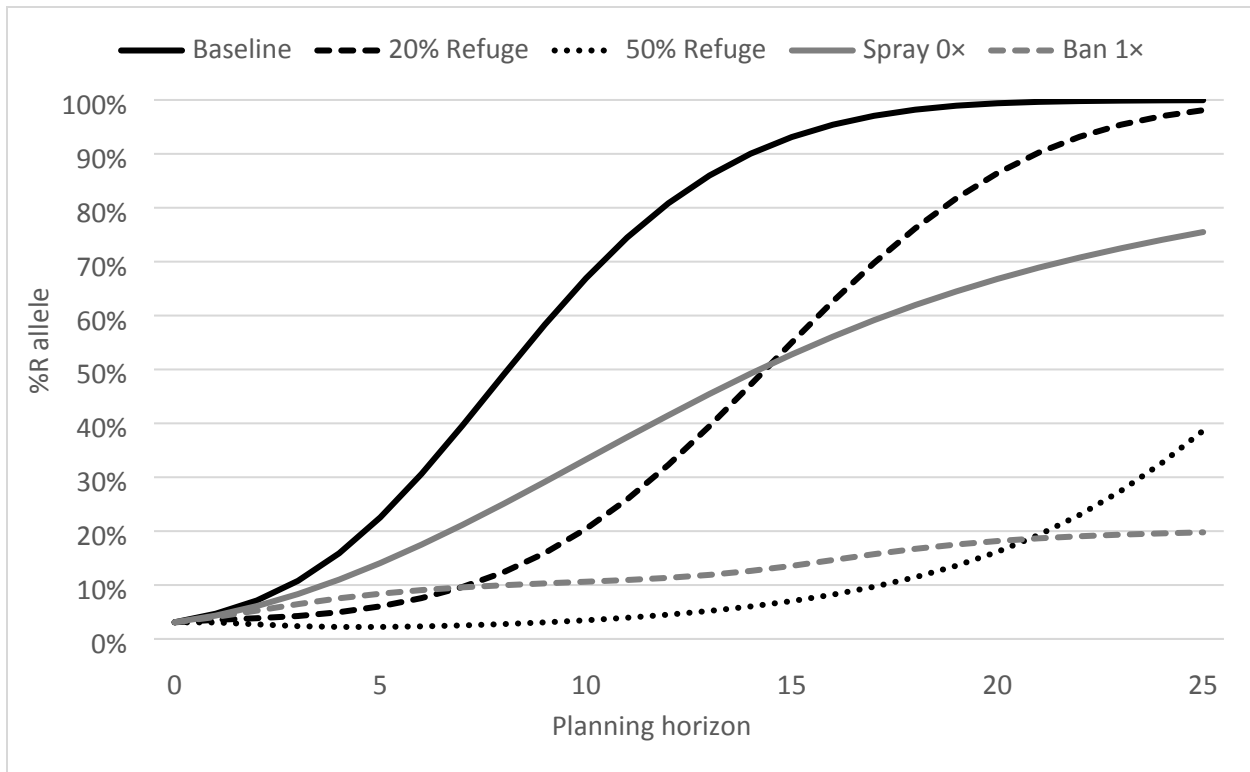

954

955 **Fig 3. R-allele frequency under single policies plotted against the planning horizon.**

956 The results for each period are averages over 1,000 simulations.

957

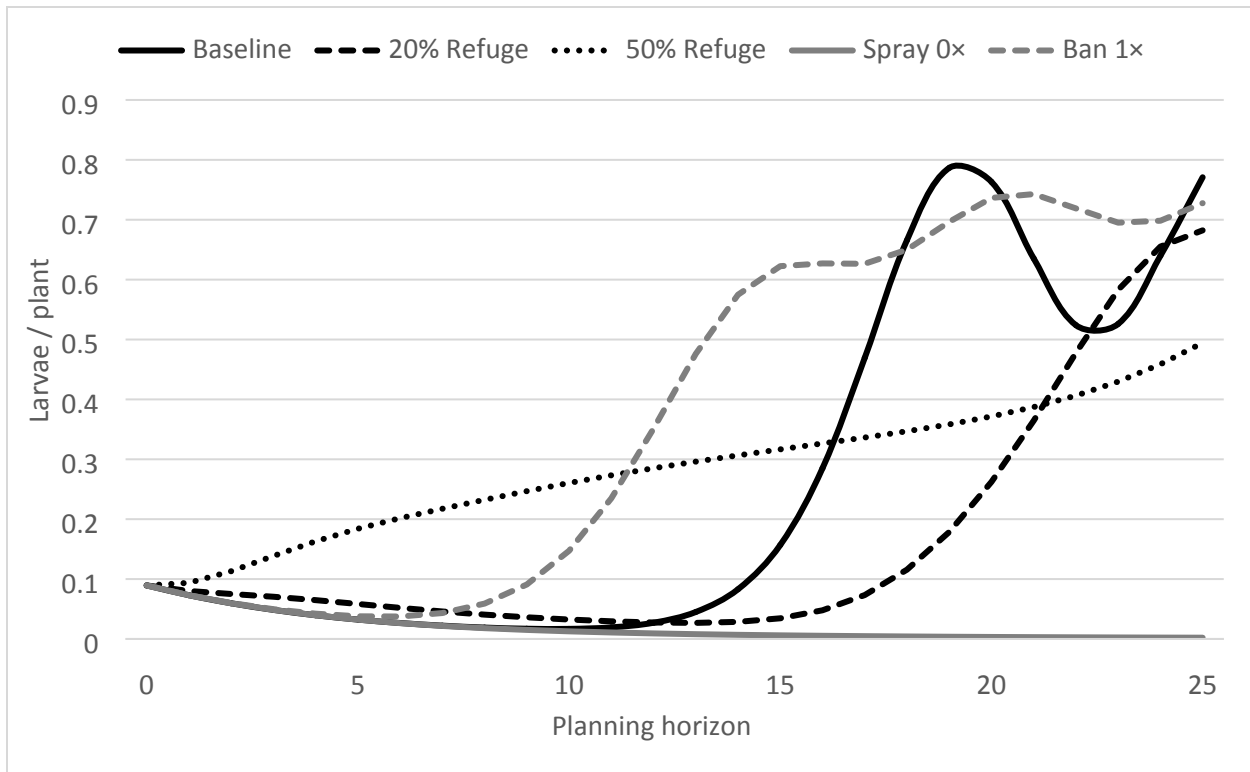

958

959 **Fig 4. Insect population density under simple policies plotted against the planning**  
960 **horizon.** The results for each period are averages over 1,000 simulations.

961

962



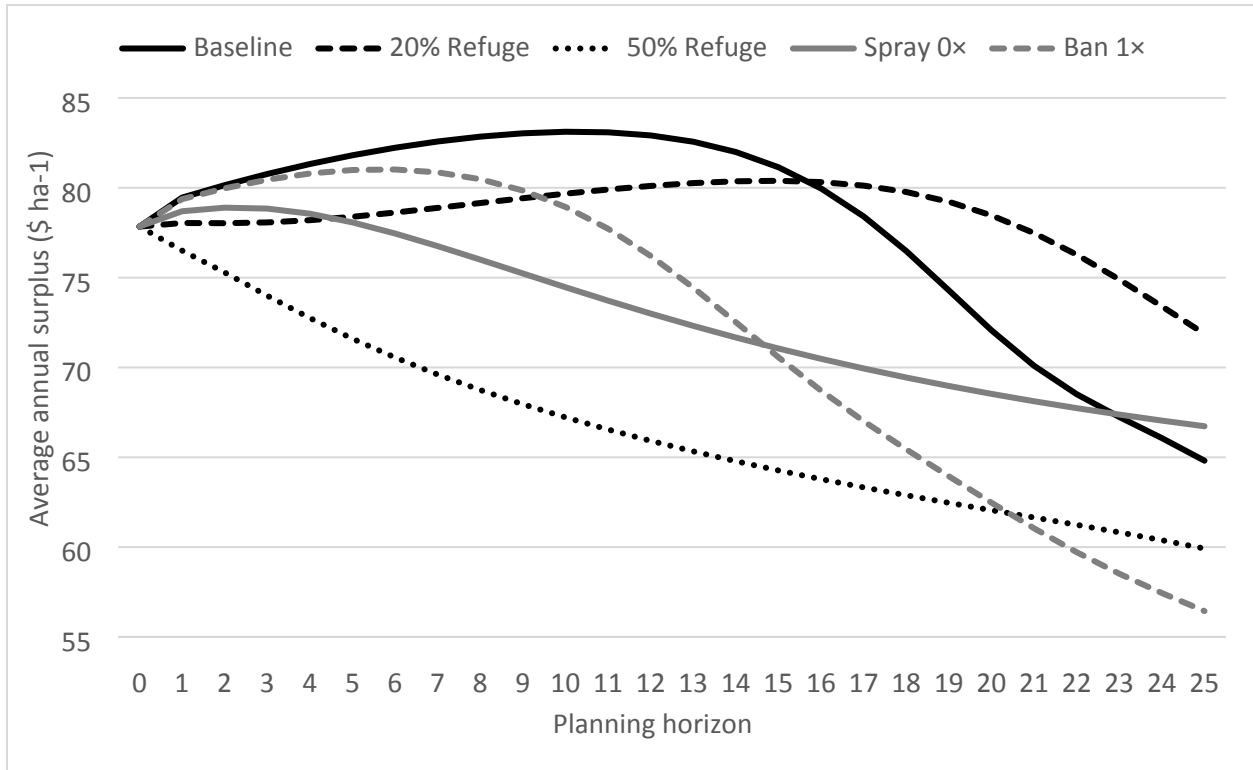

963

964 **Fig 5. Average annual surplus for different mitigation policies plotted against the**  
965 **planning horizon.**

966

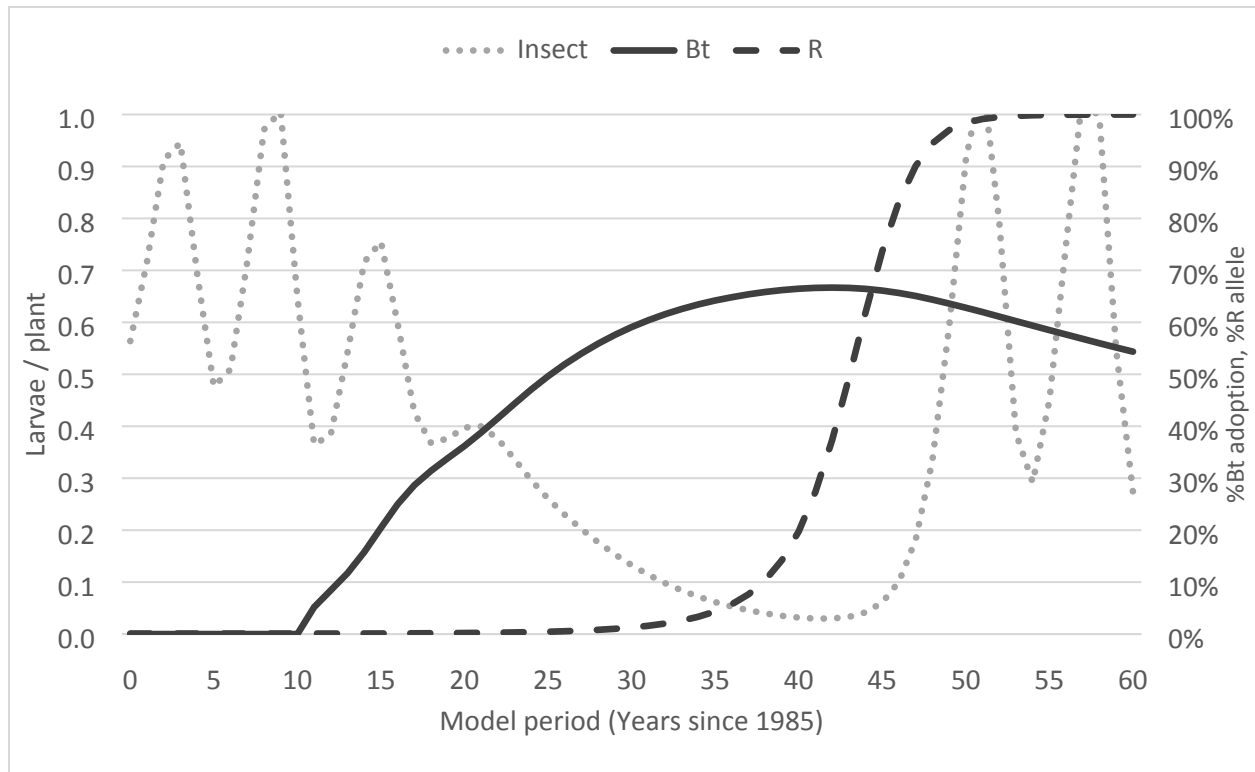

967

968 **Fig 6. Results from the calibrated model without social network effects.** It contains the

969 insect population density (Insect), Bt seed adoption rate (Bt), and the resistance allele

970 frequency (R) for the calibrated model without social network effects. The results for each

971 period are averages over 1,000 simulations.

972

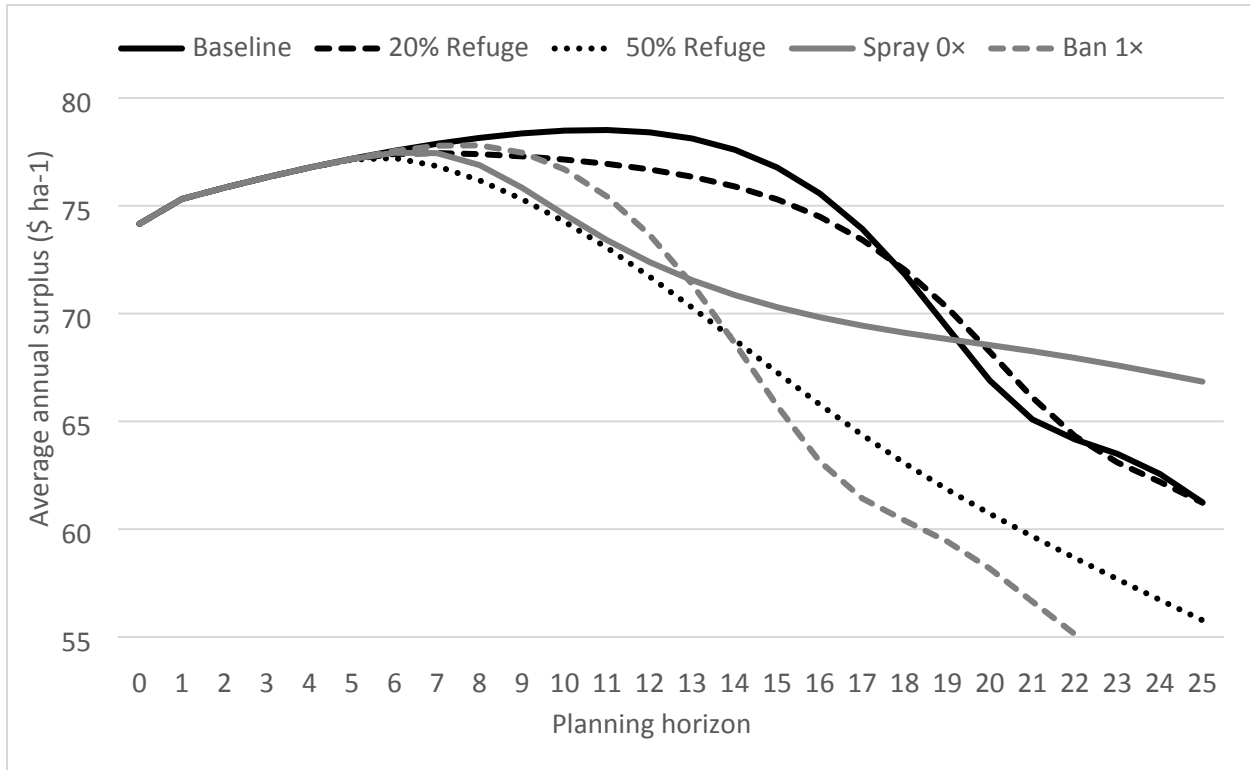

973

974 **Fig 7. Average annual surplus for different mitigation policies.** Each is plotted against  
975 the planning horizon for the calibrated model without social network effects.

976

977

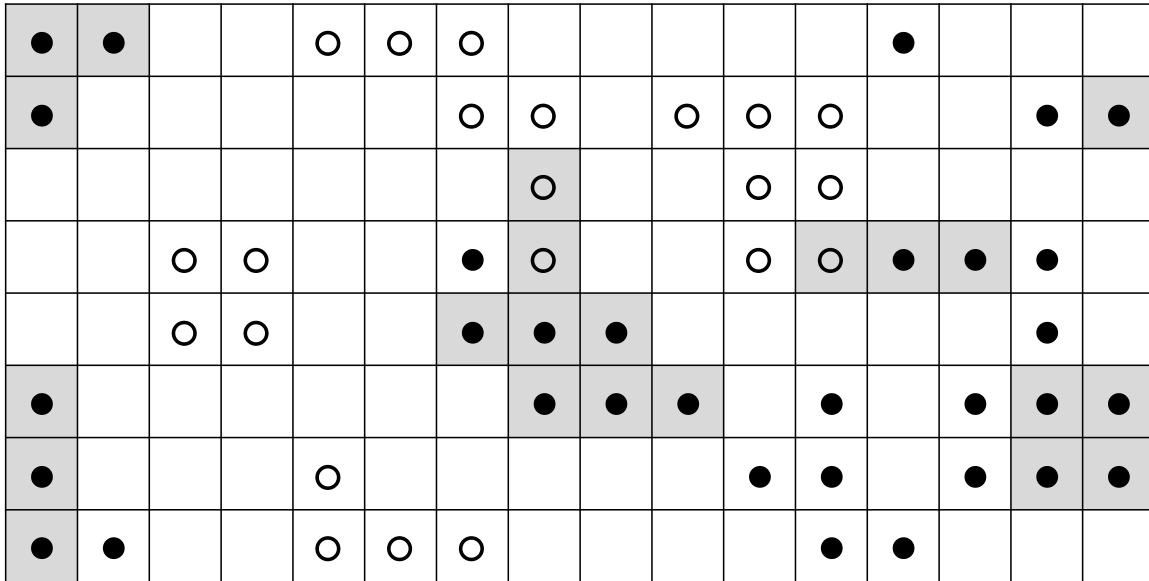

978

979

980 **Fig 8. Example model landscape.** Circle (○) represents a field planted to non-Bt maize,

981 black dot (●) represents a field planted to Bt maize, and light-gray (■□) indicates a field with

982 a pest population with a resistance allele frequency of more than 50% before adult dispersal.

983

984

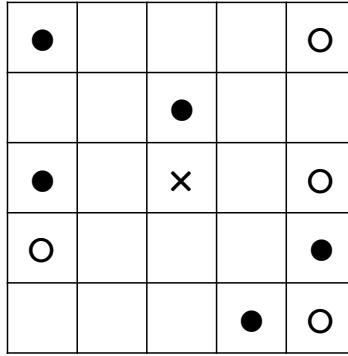

985

986 **Fig 9. Example size-2 neighborhood.** It is centered on a farmer (×) with nine neighbors  
987 who plant maize, either Bt maize (●) or non-Bt maize (○).

988

989

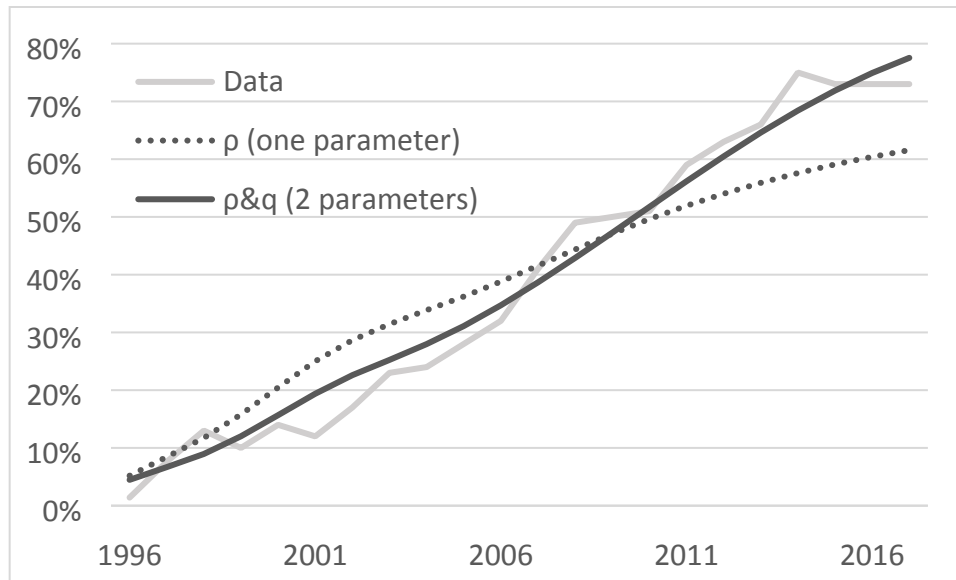

990

991 **Fig 10. Aggregate adoption of Bt maize in Wisconsin and two simulated results.** The

992 simulated results are generated by calibrating one parameter and two-parameters.

993

994

995 Supporting information

996

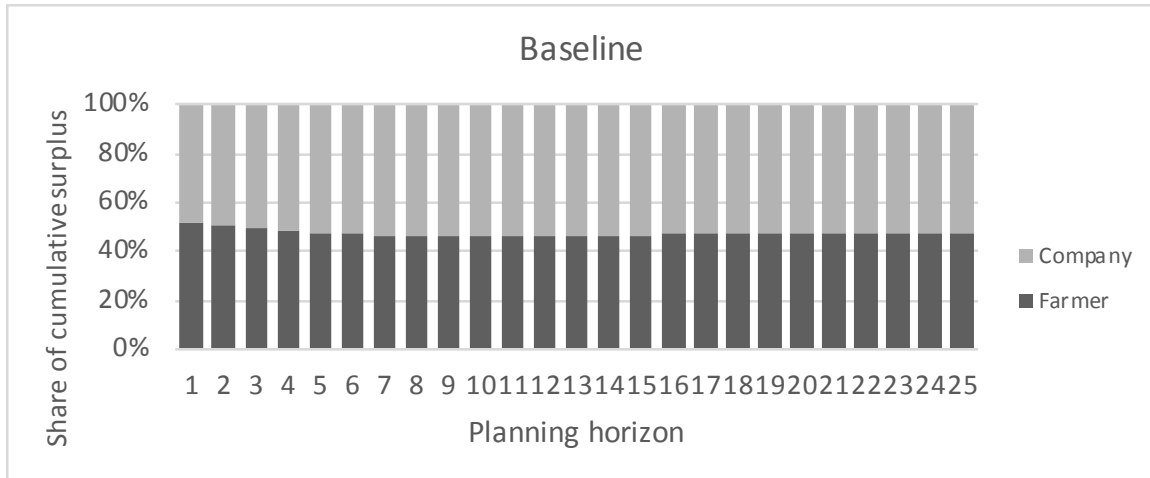

997

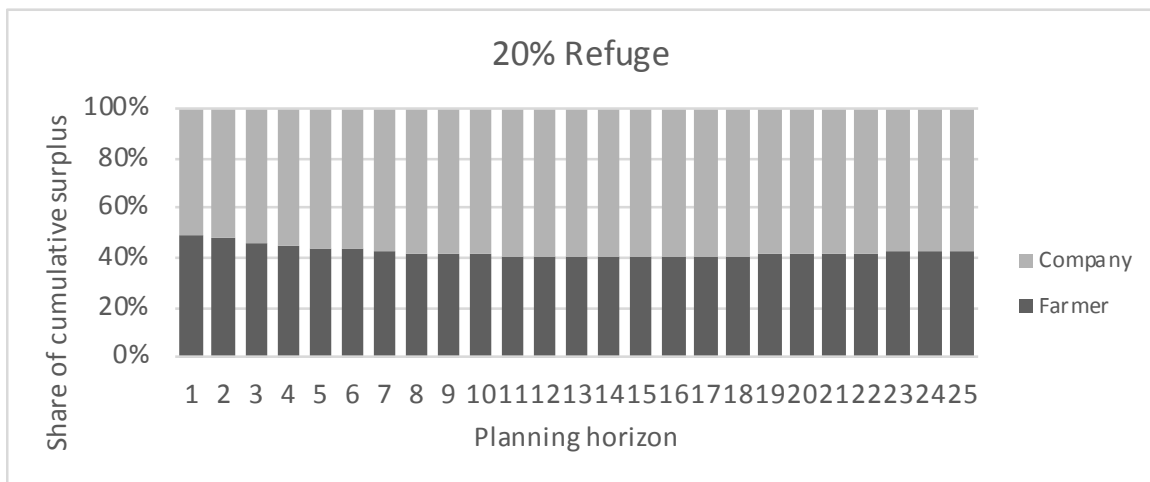

998

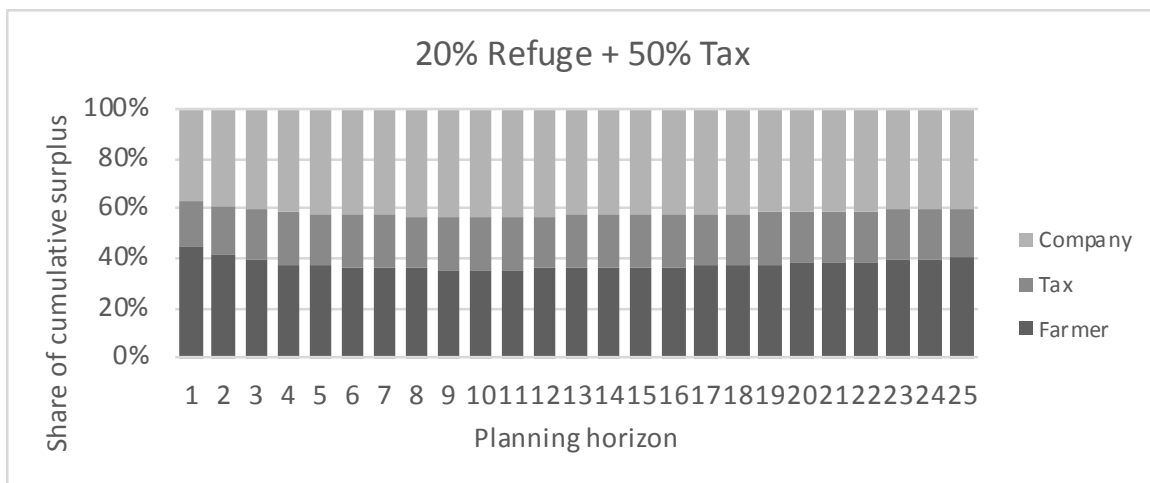

999

1000 **Fig S1. Cumulative share of surplus by planning horizon.** The top panel is for the baseline,  
1001 the middle is for the 20% refuge mitigation policy, and the bottom is for the 20% refuge  
1002 mitigation policy combined with a 50% Bt seed tax.  
1003



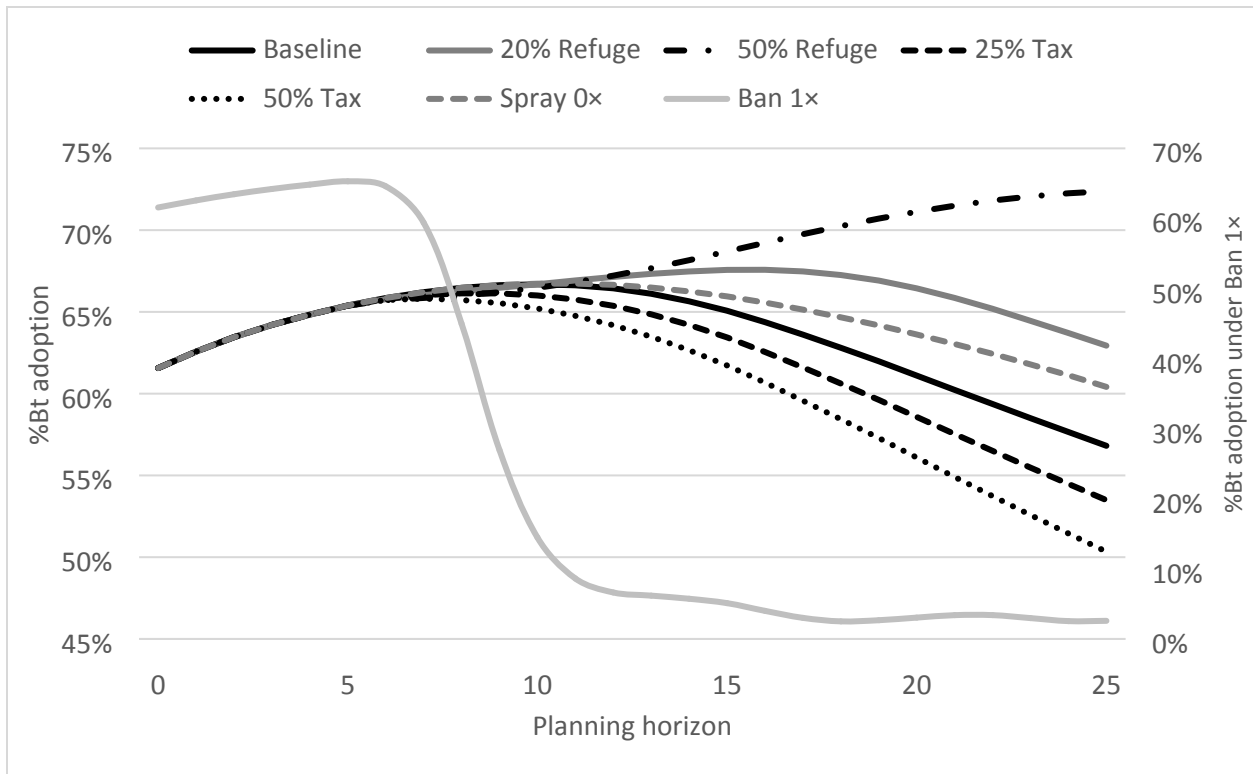

1004

1005 **Fig S2. Bt adoption rate under simple policies.** Each is plotted against the planning  
1006 horizon without social network effects. The results for each period are averages over 1,000  
1007 simulations.

1008

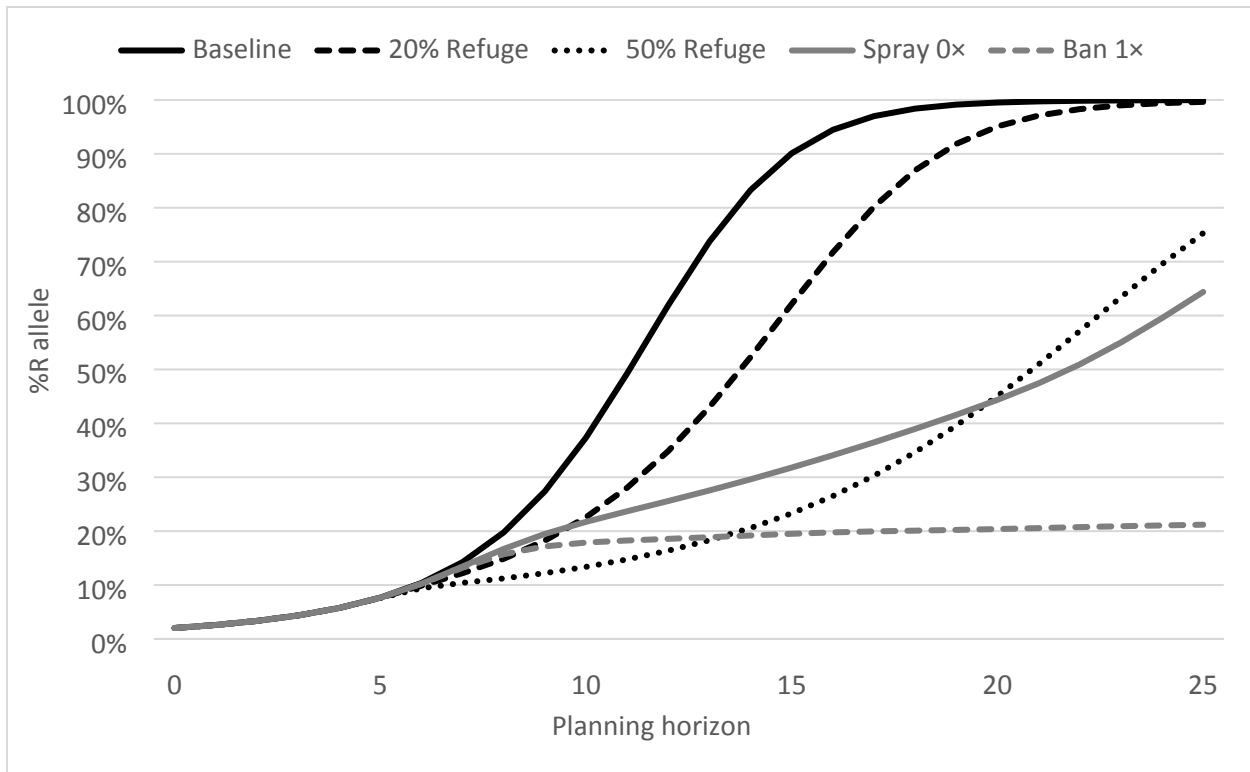

1009

1010 **Fig S3. R-allele frequency under simple policies.** Each is plotted against the planning  
1011 horizon without social network effects. The results for each period are averages over 1,000  
1012 simulations.

1013

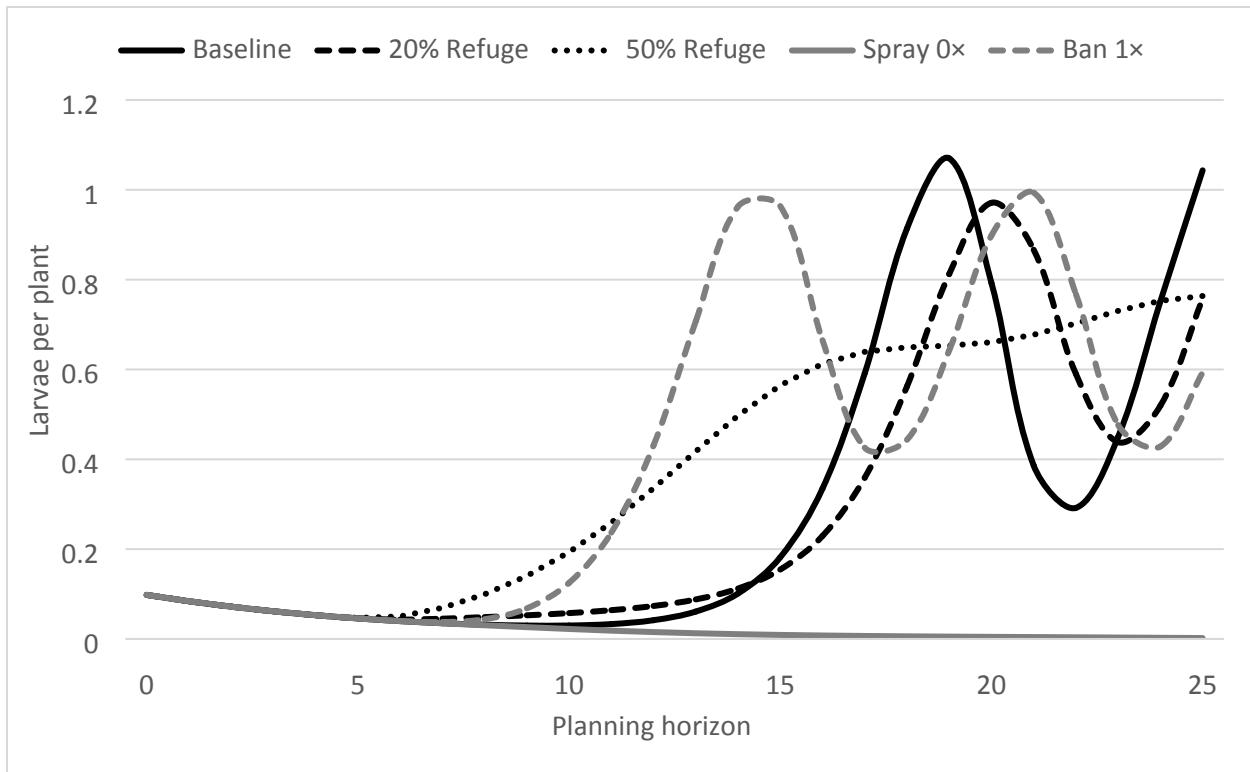

1014

1015 **Fig S4. Insect population density under simple policies.** Each is plotted against the  
1016 planning horizon without social network effects. The results for each period are averages  
1017 over 1,000 simulations.

1018

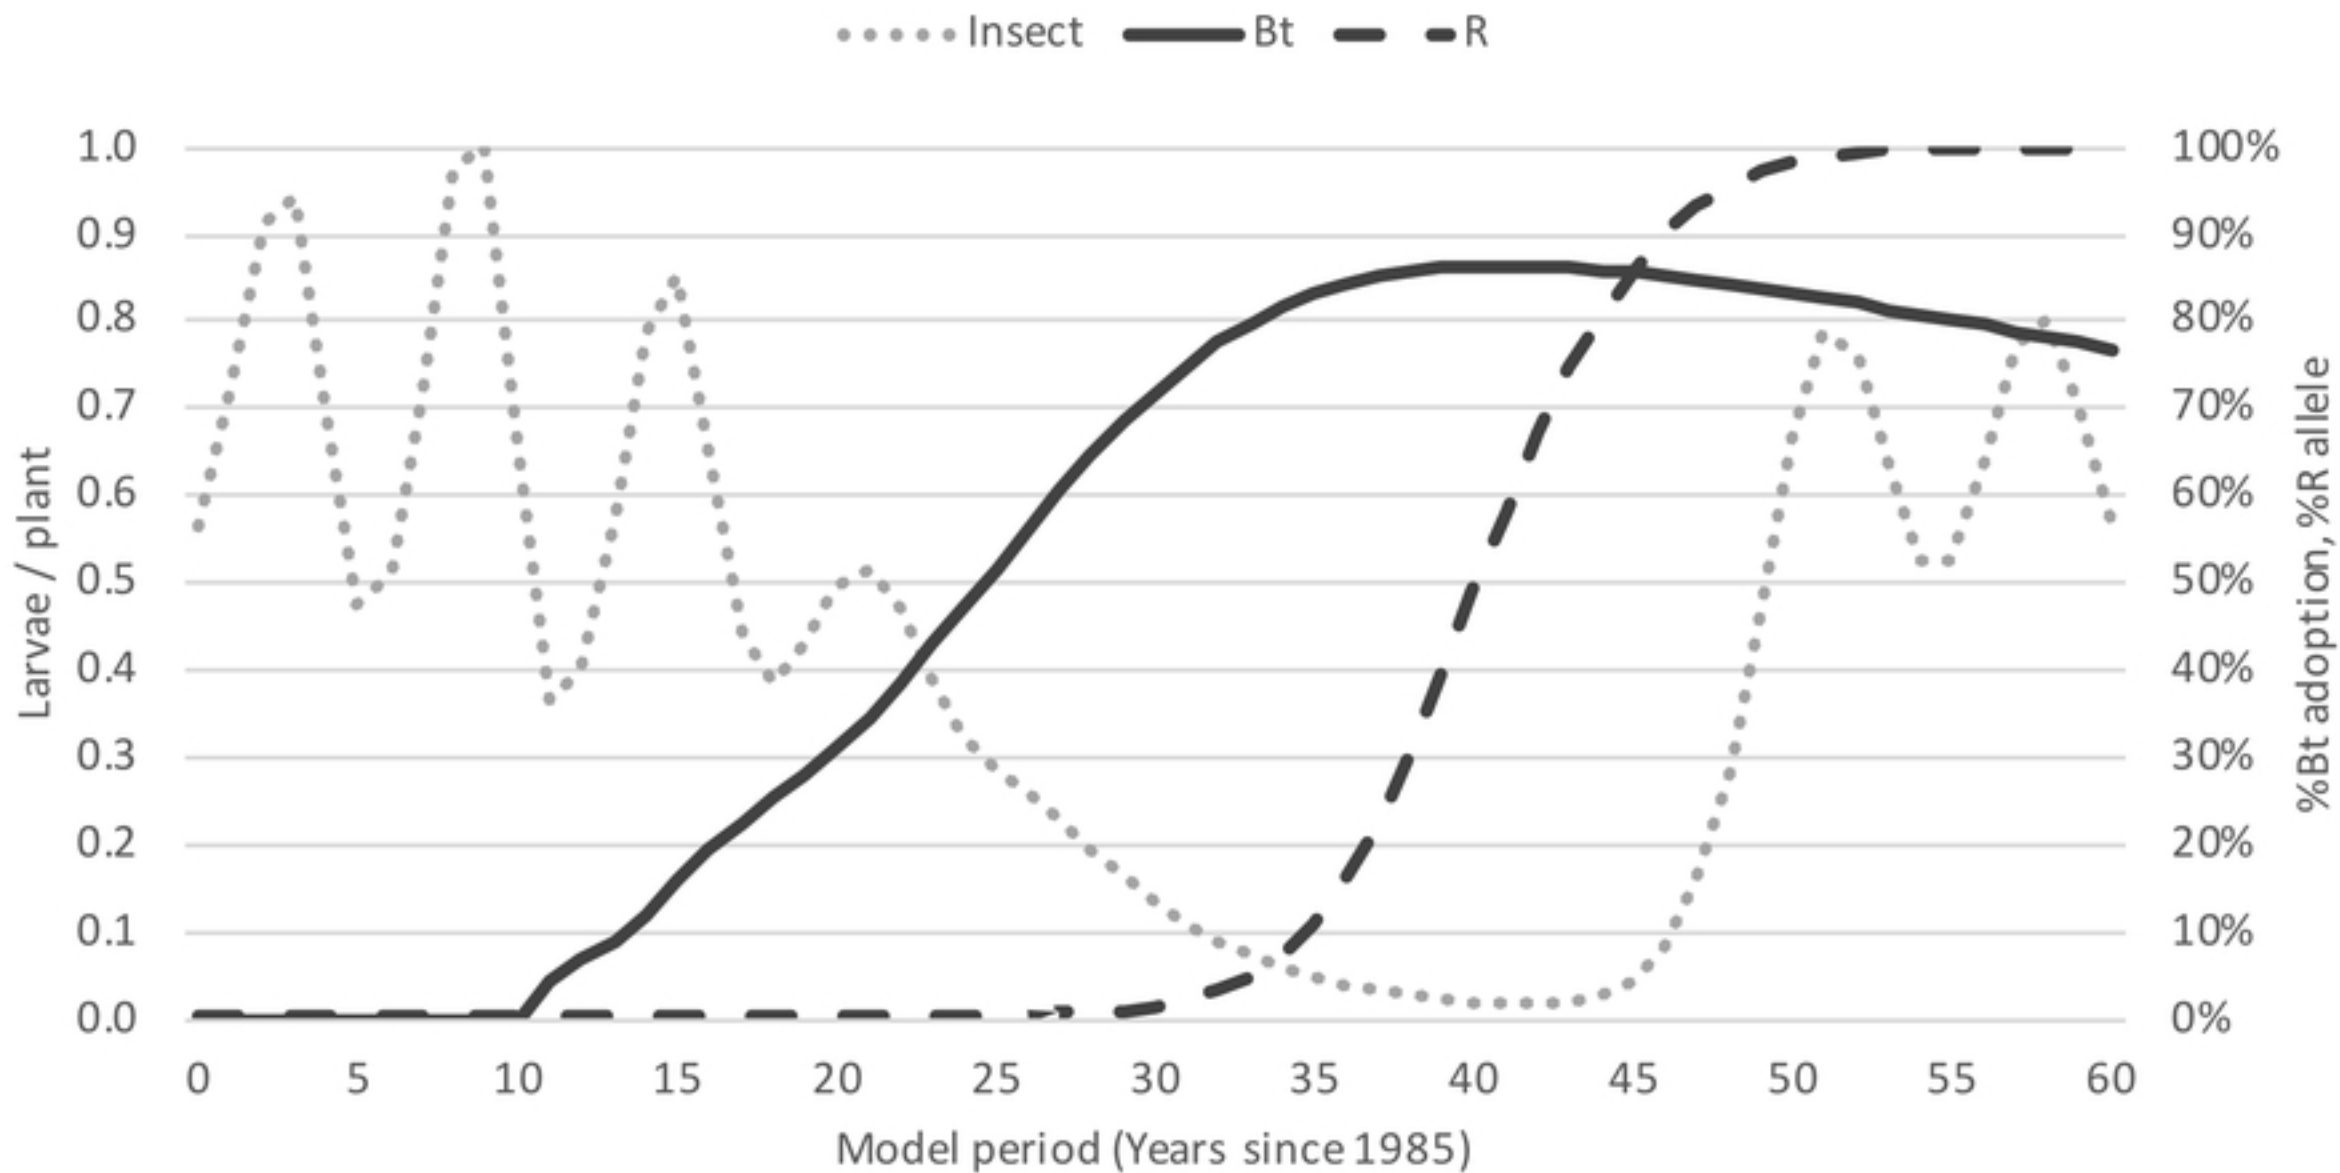

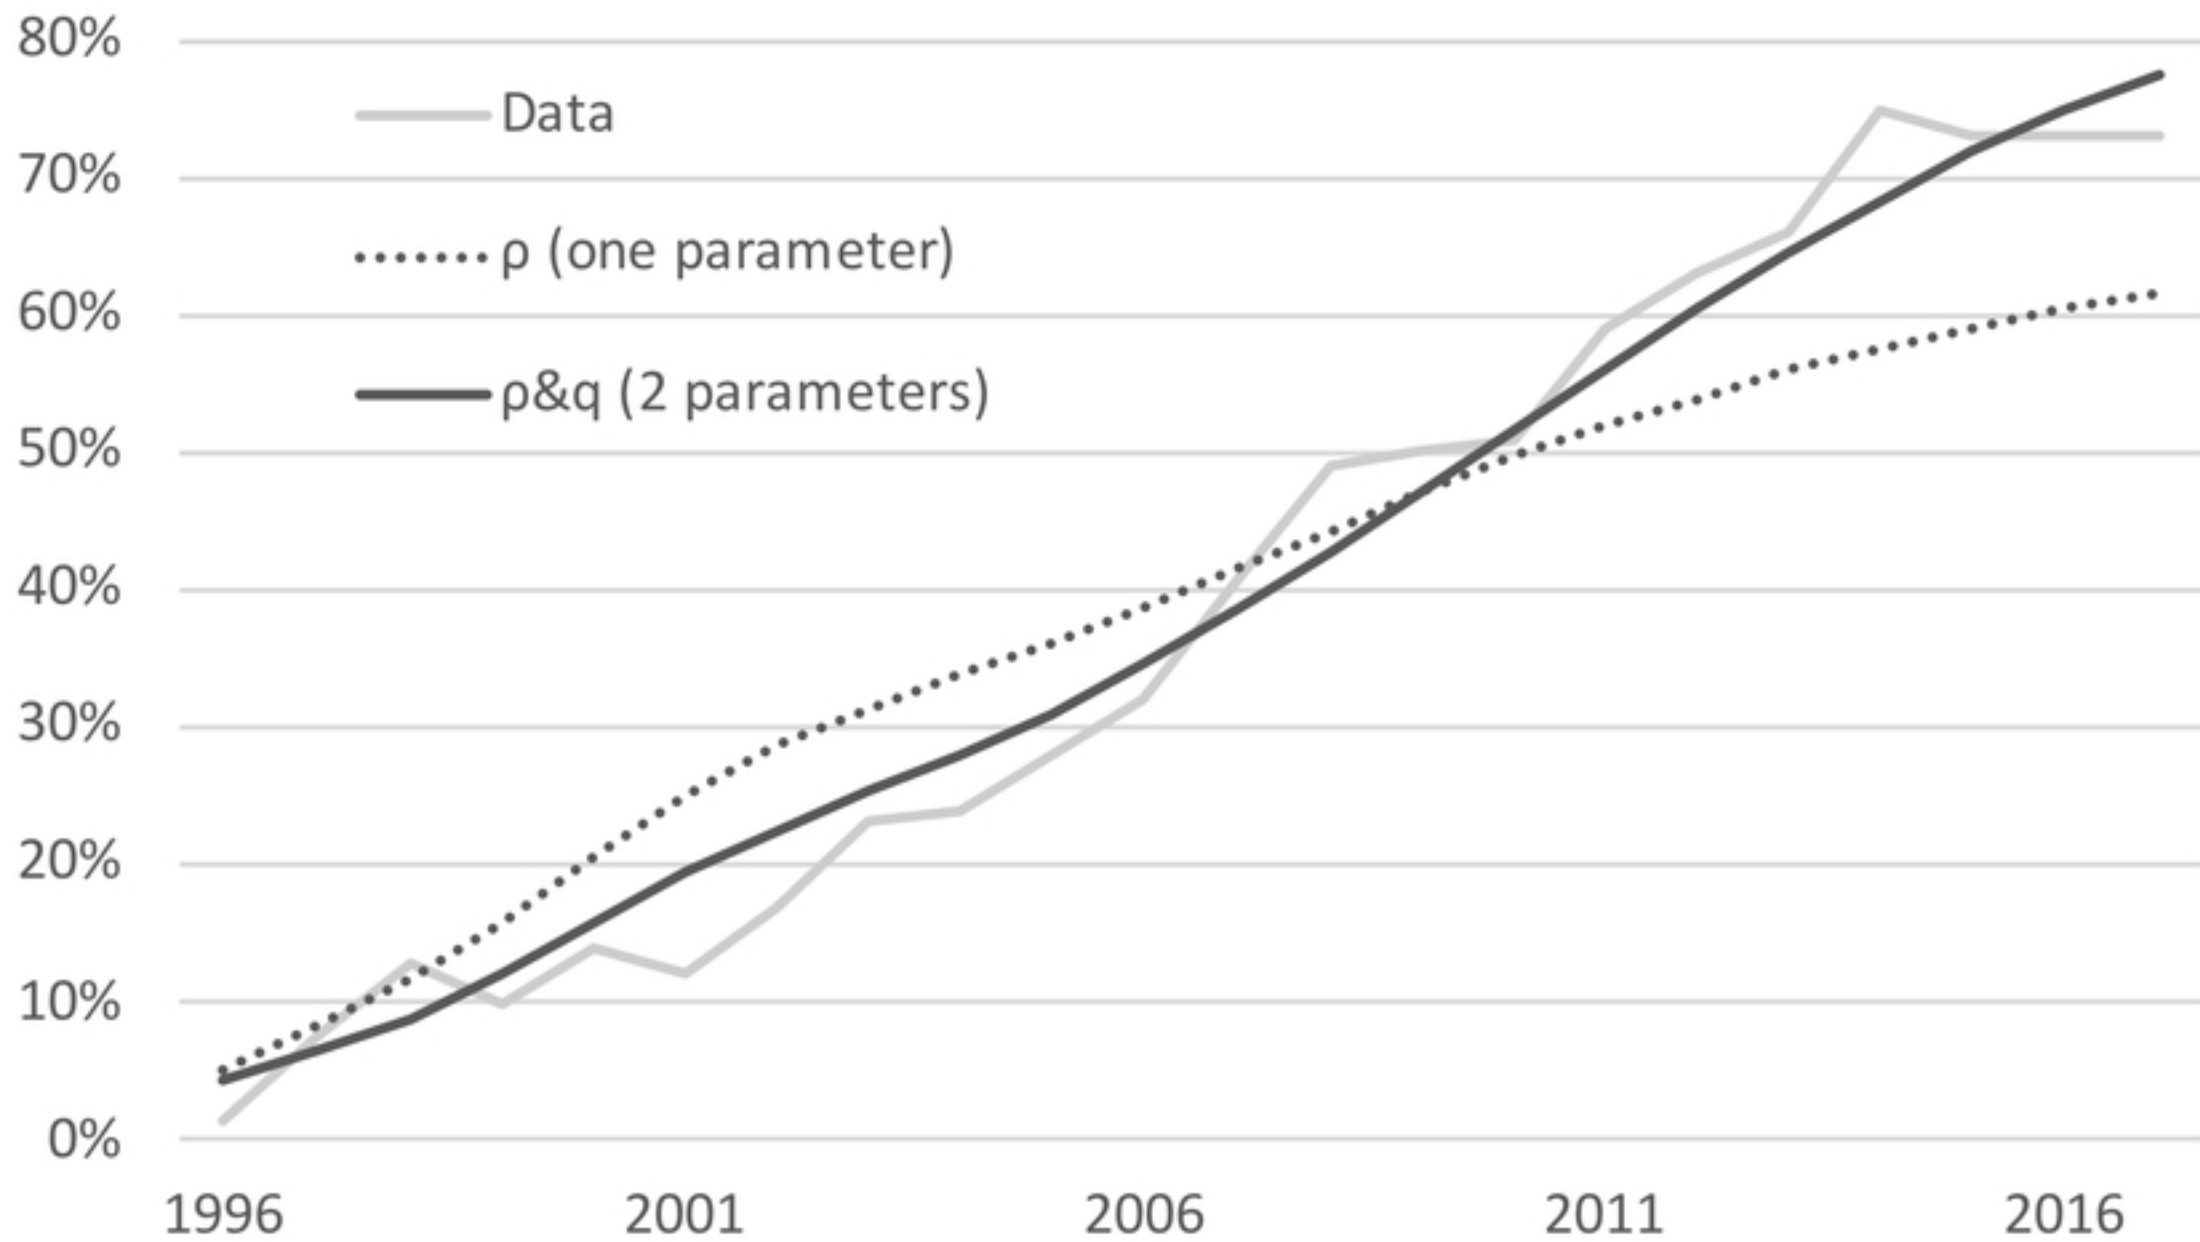

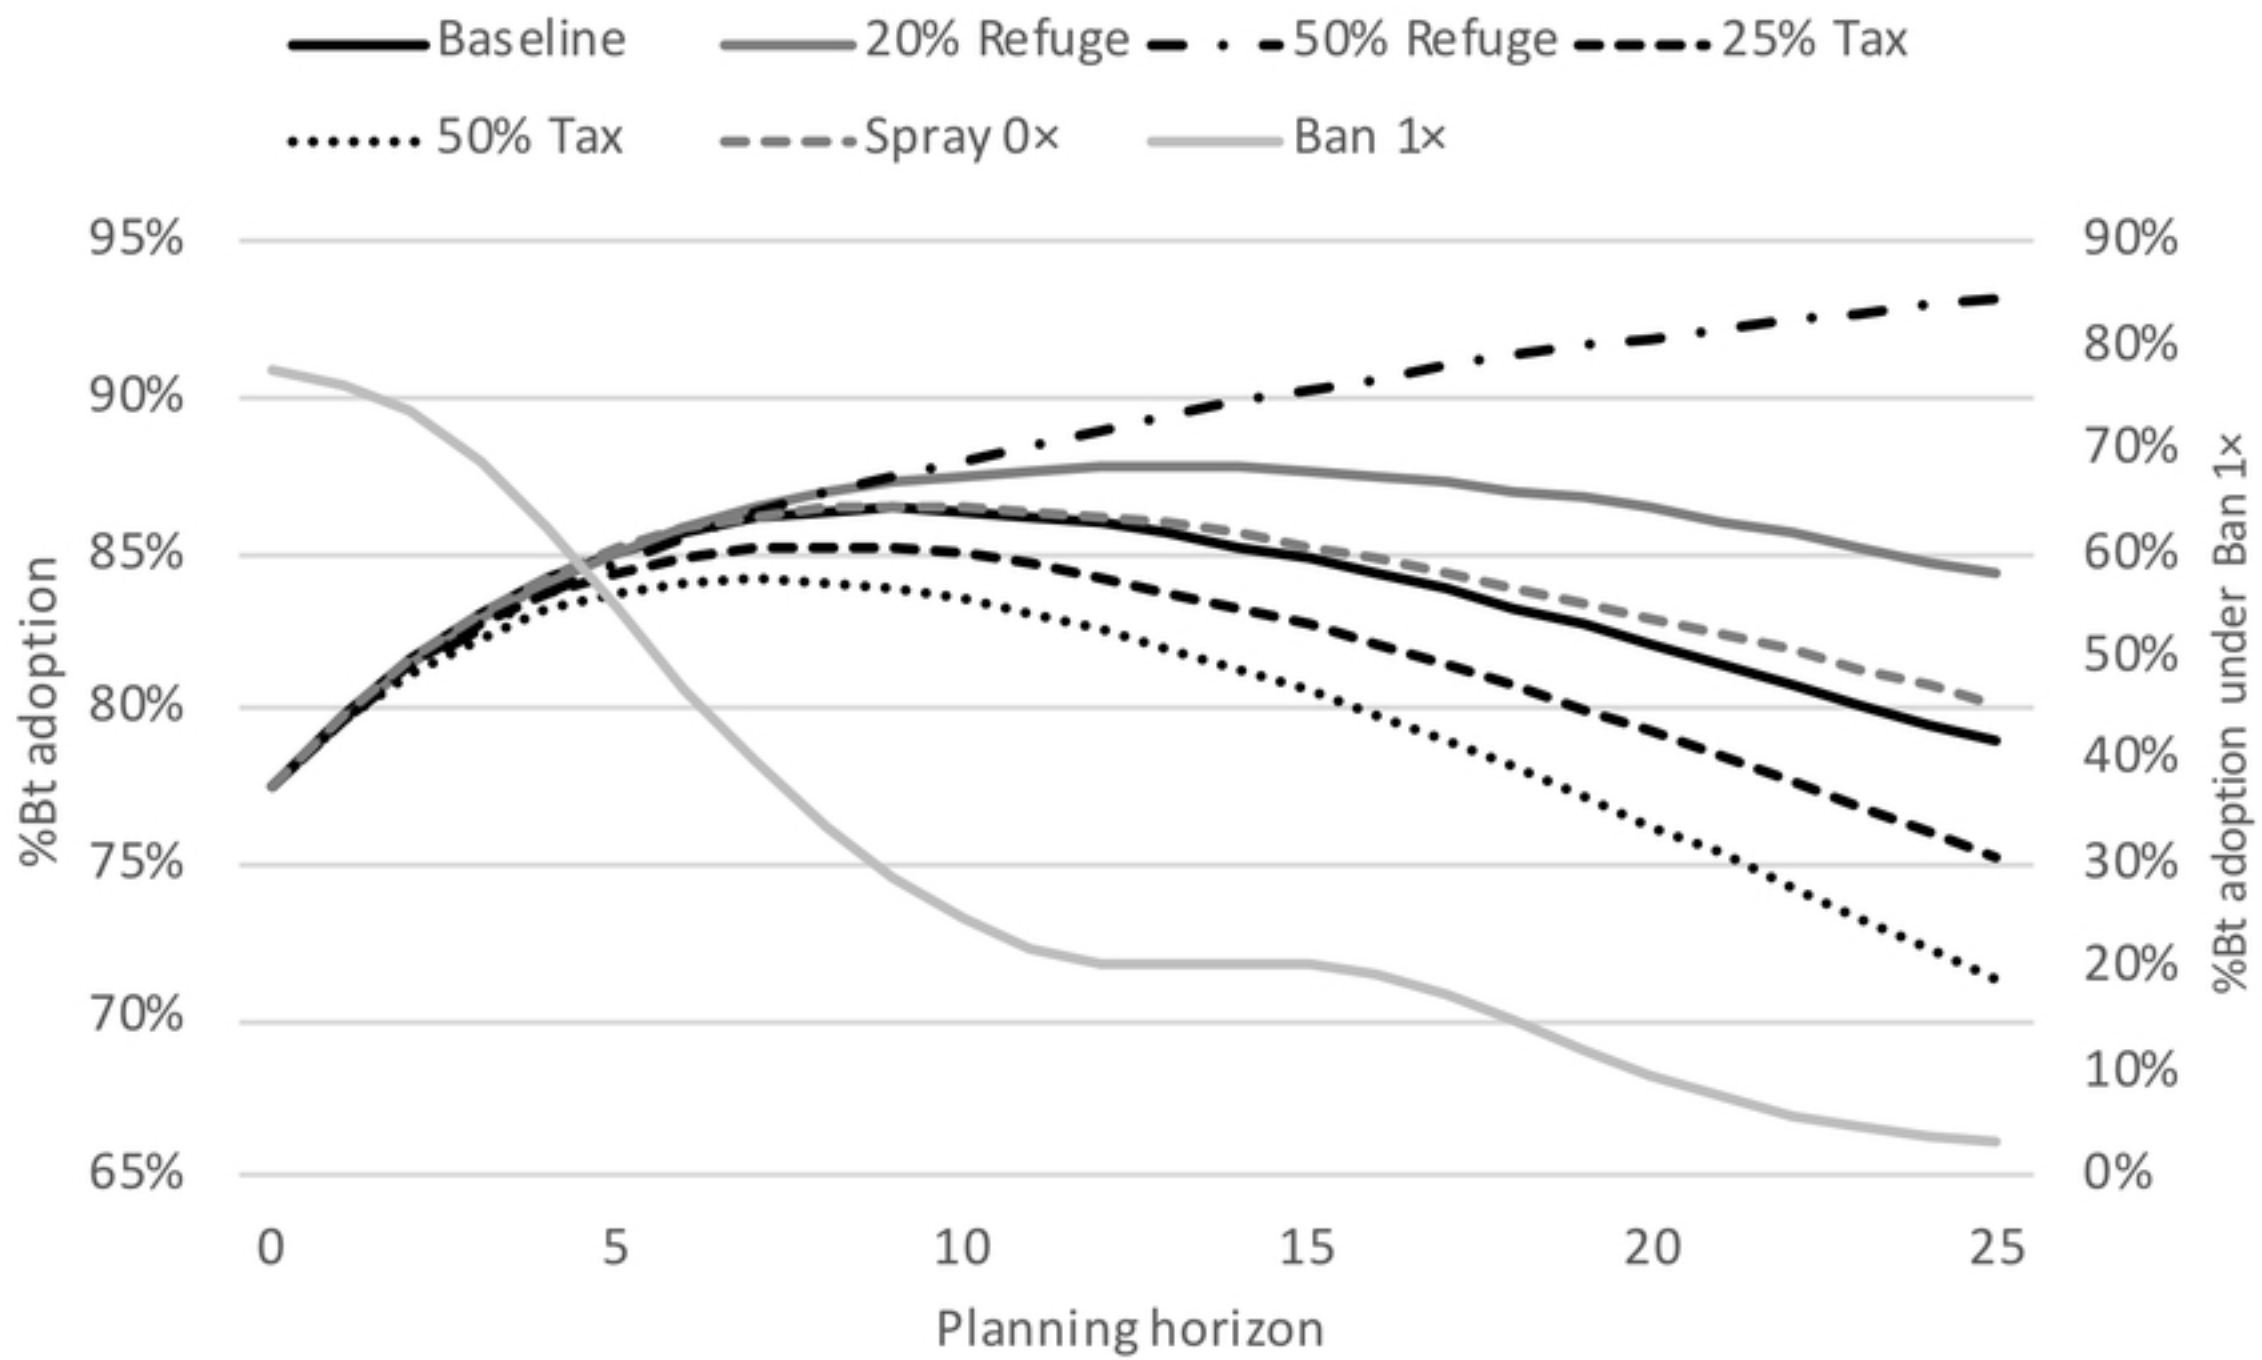

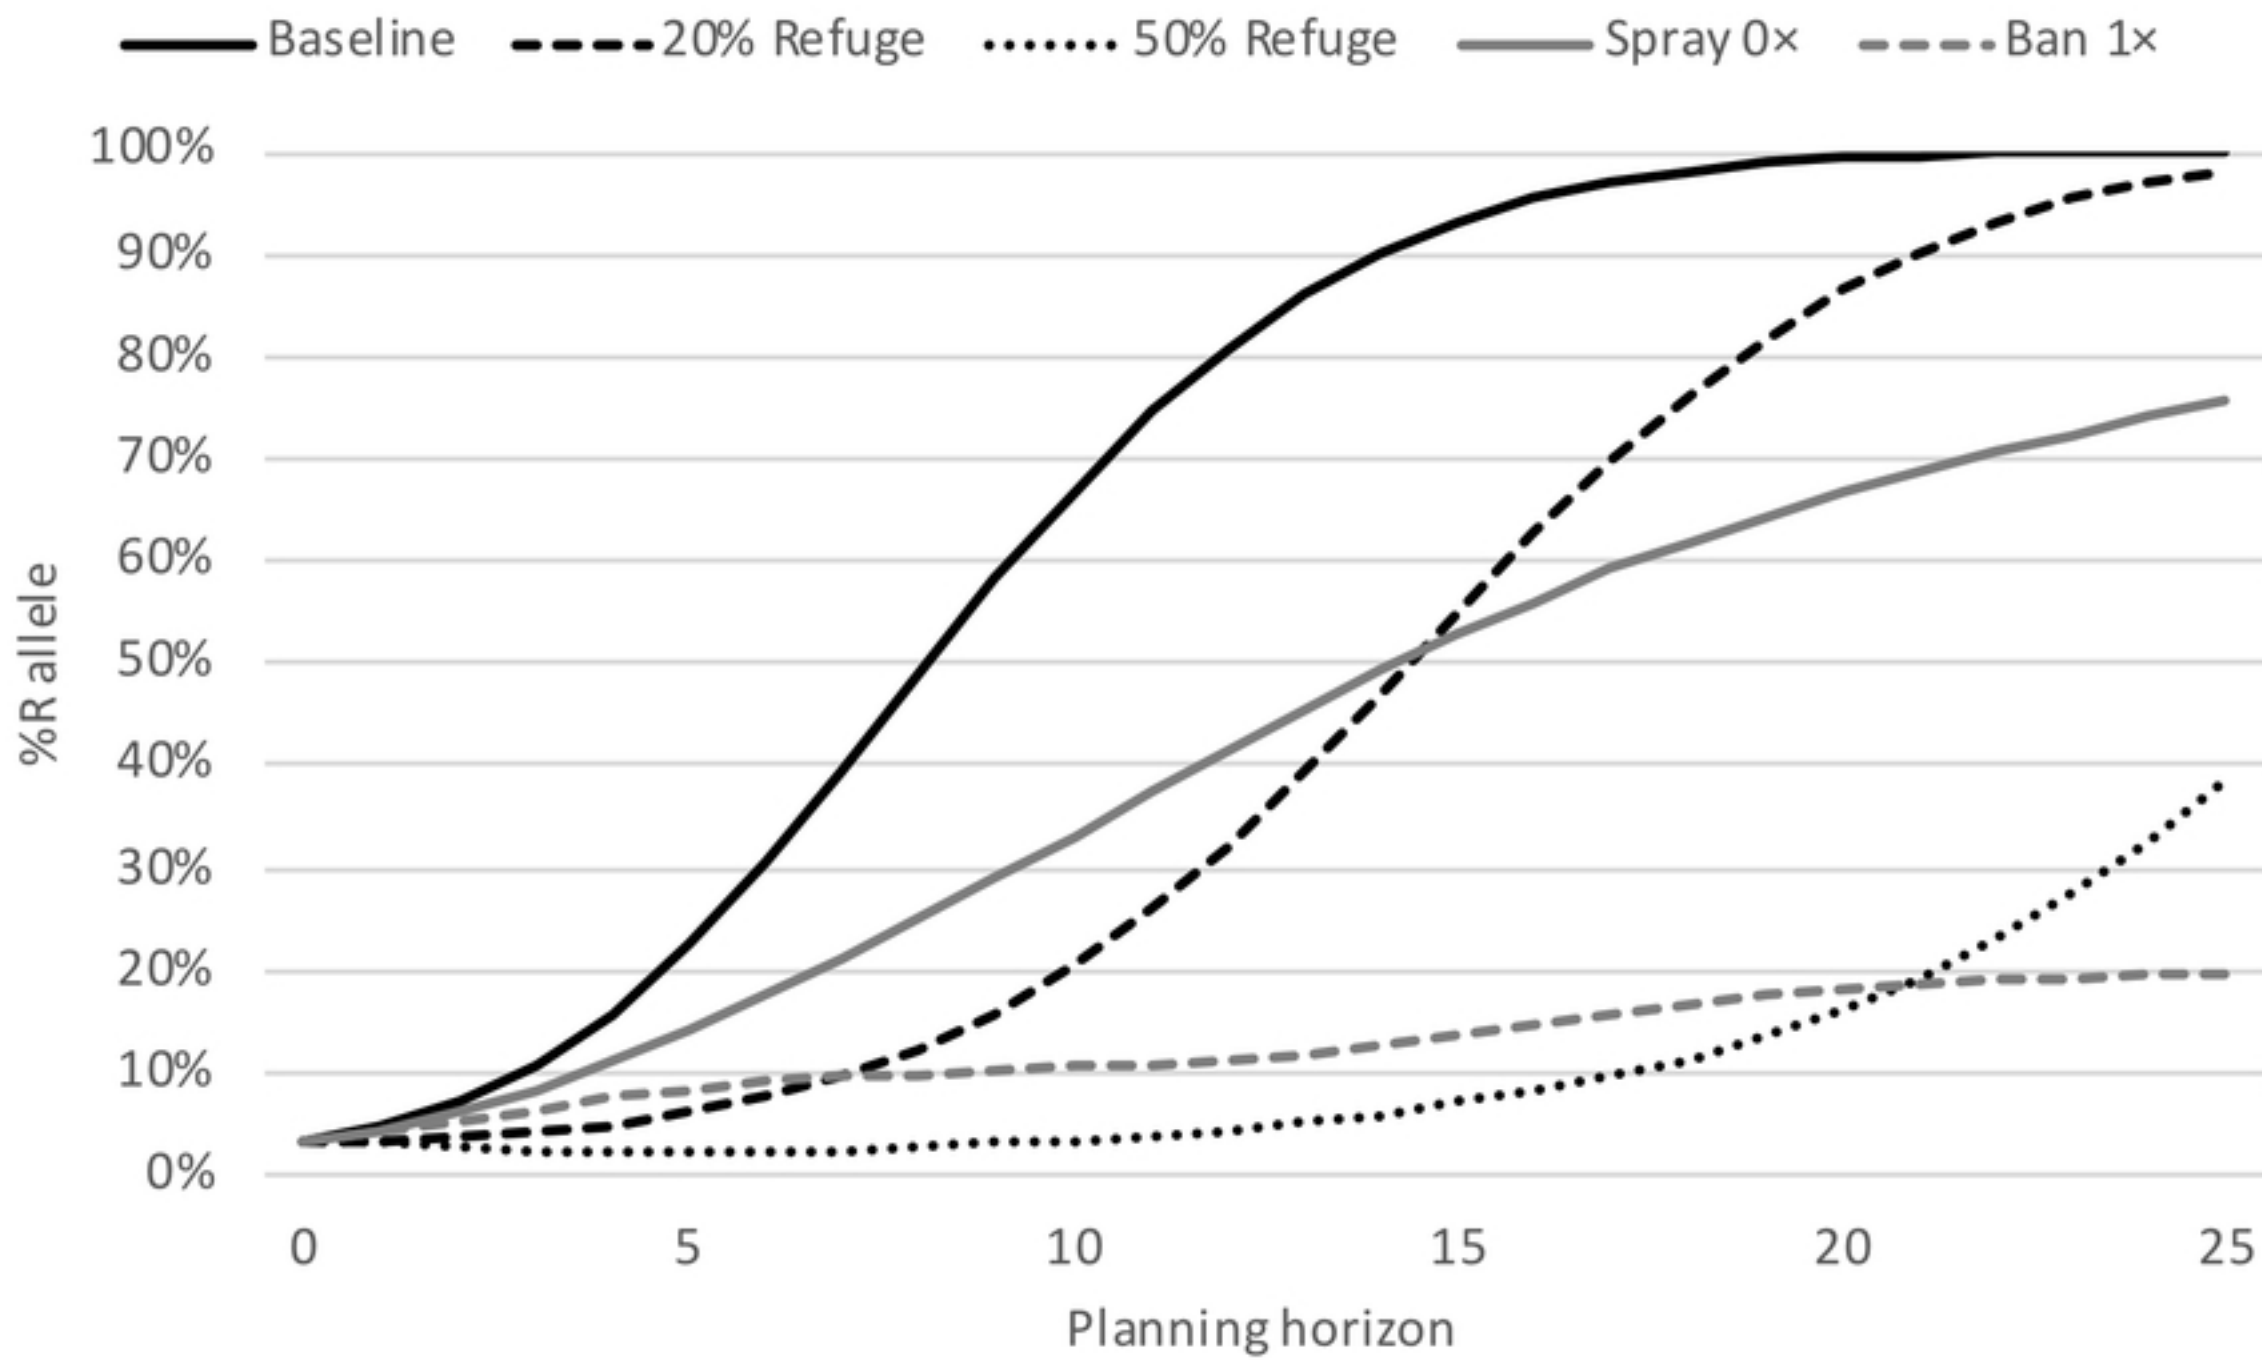

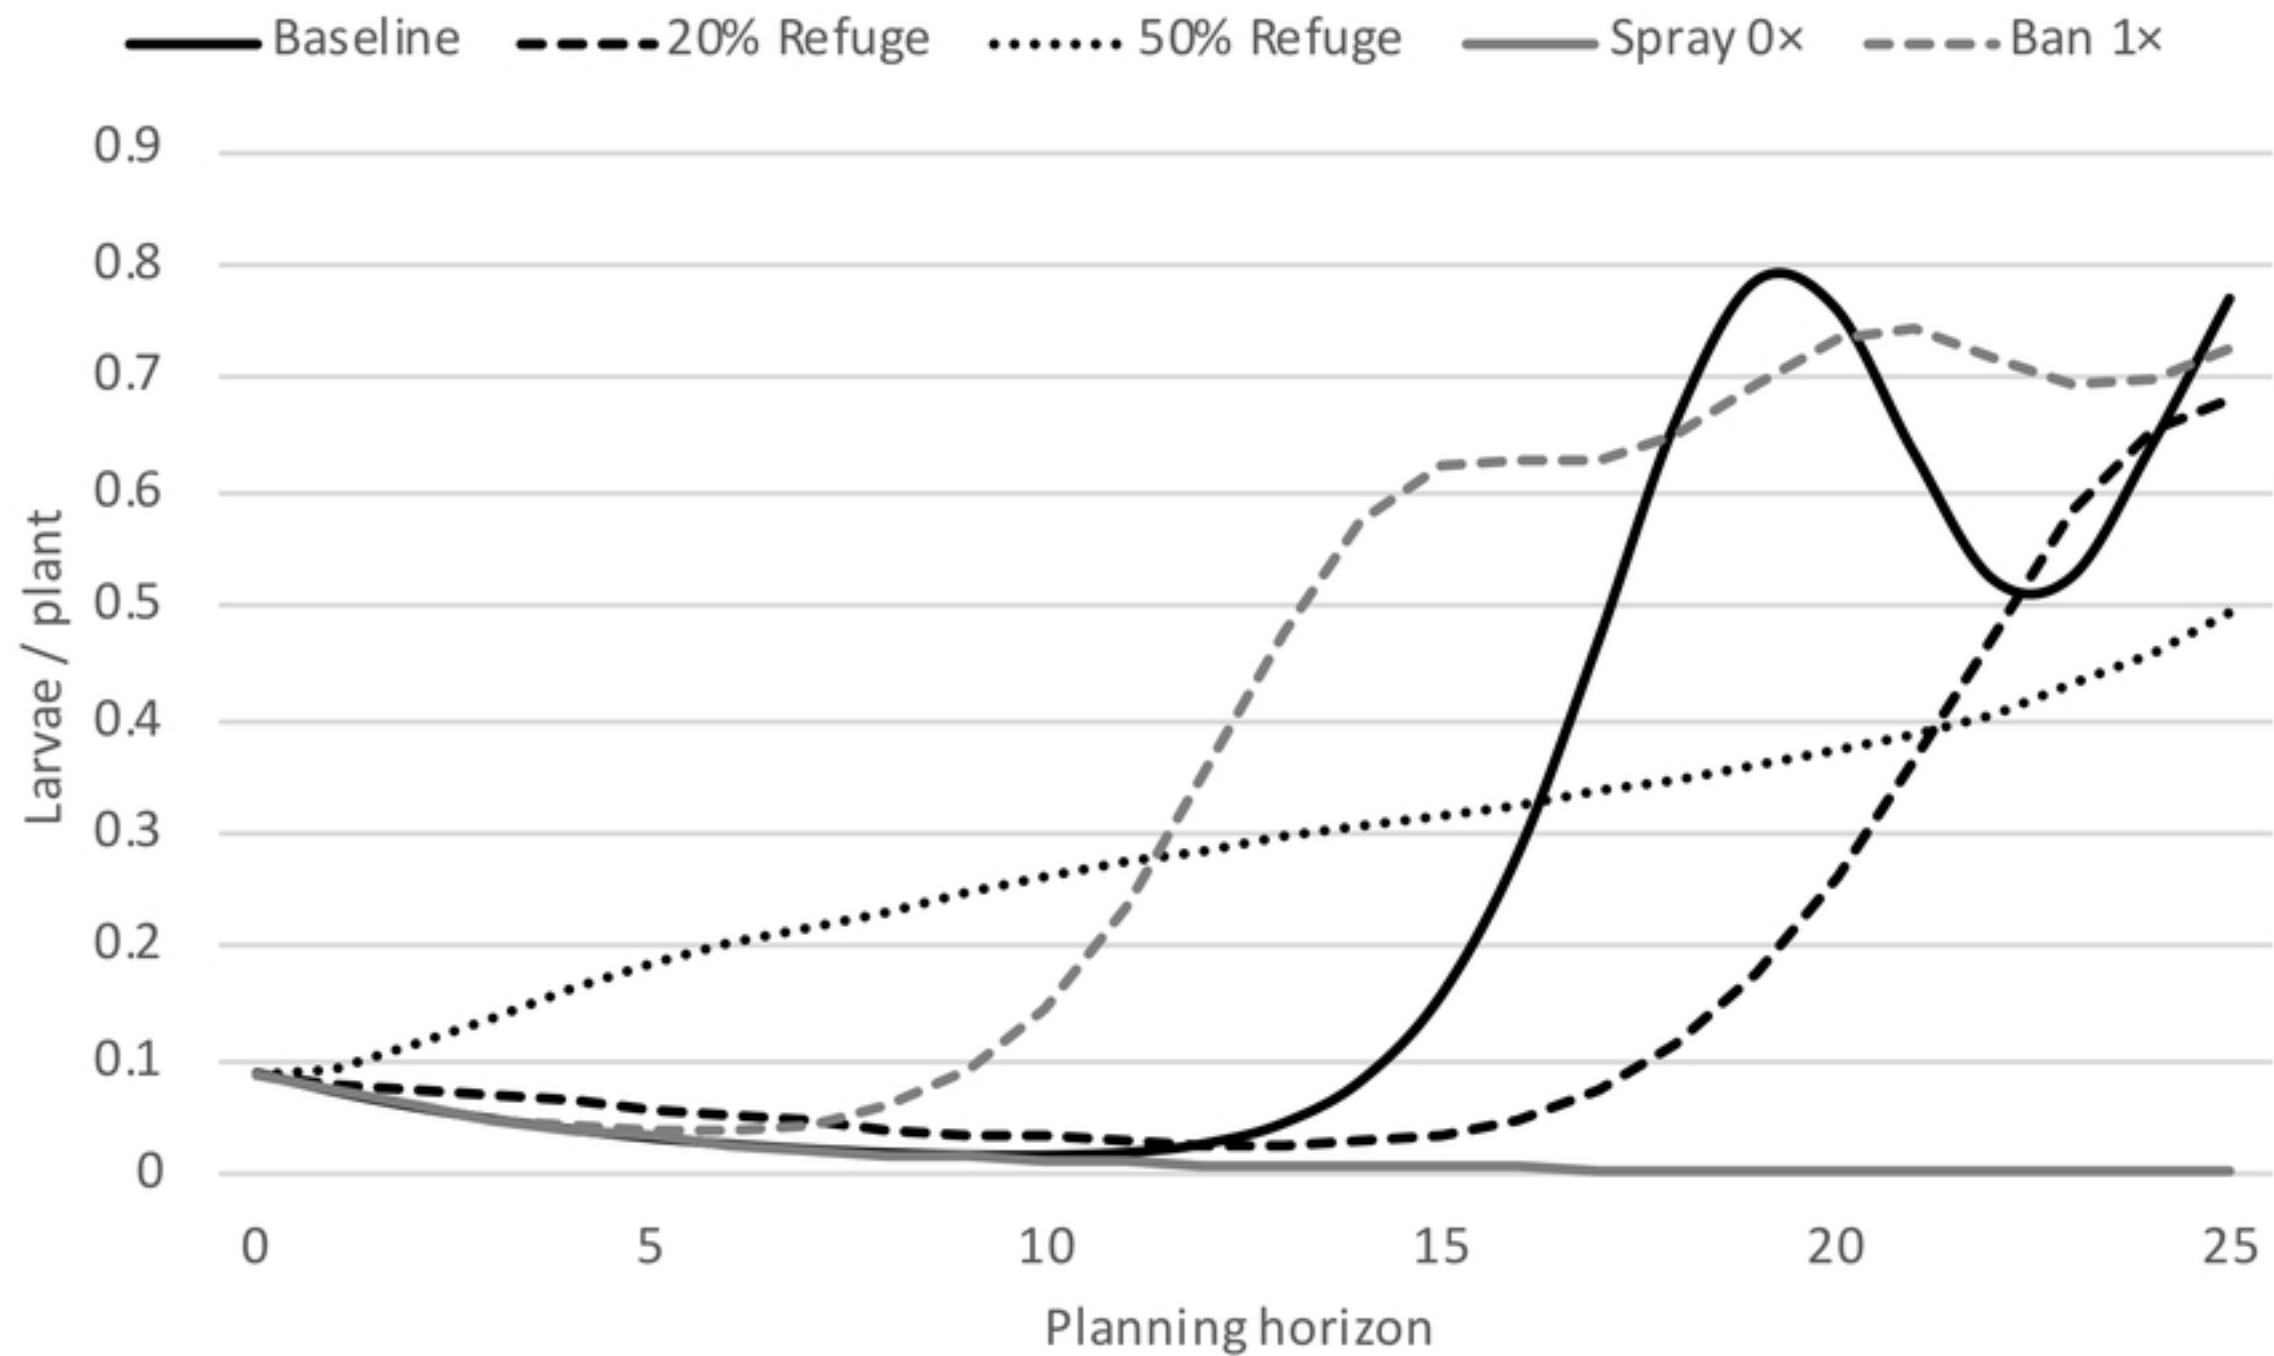



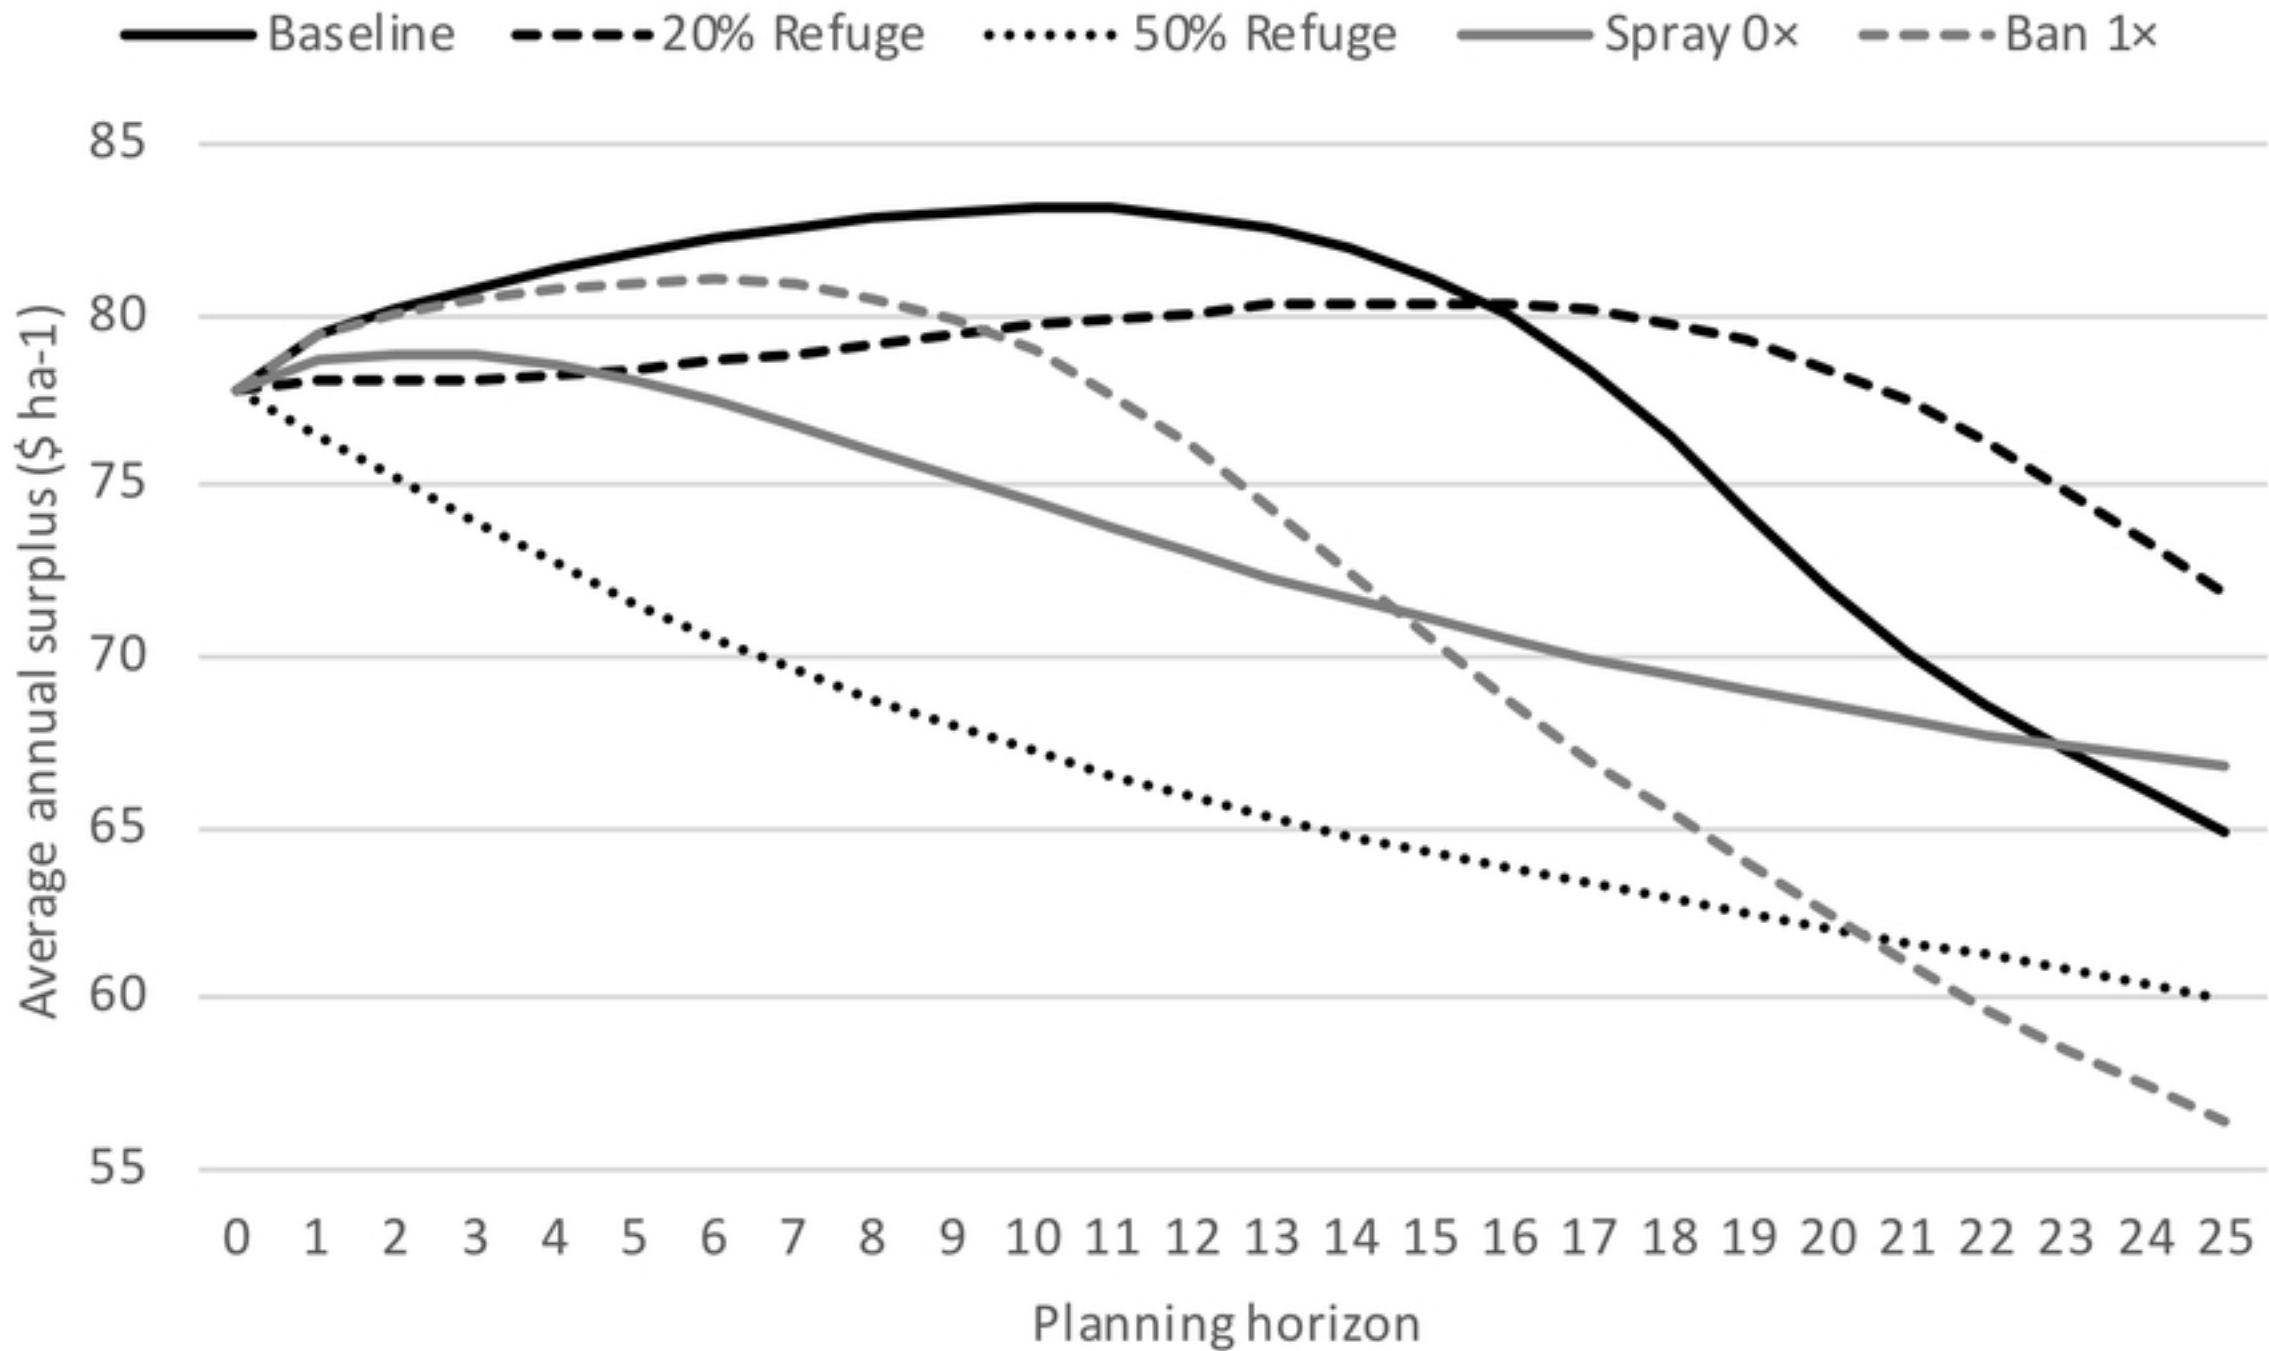

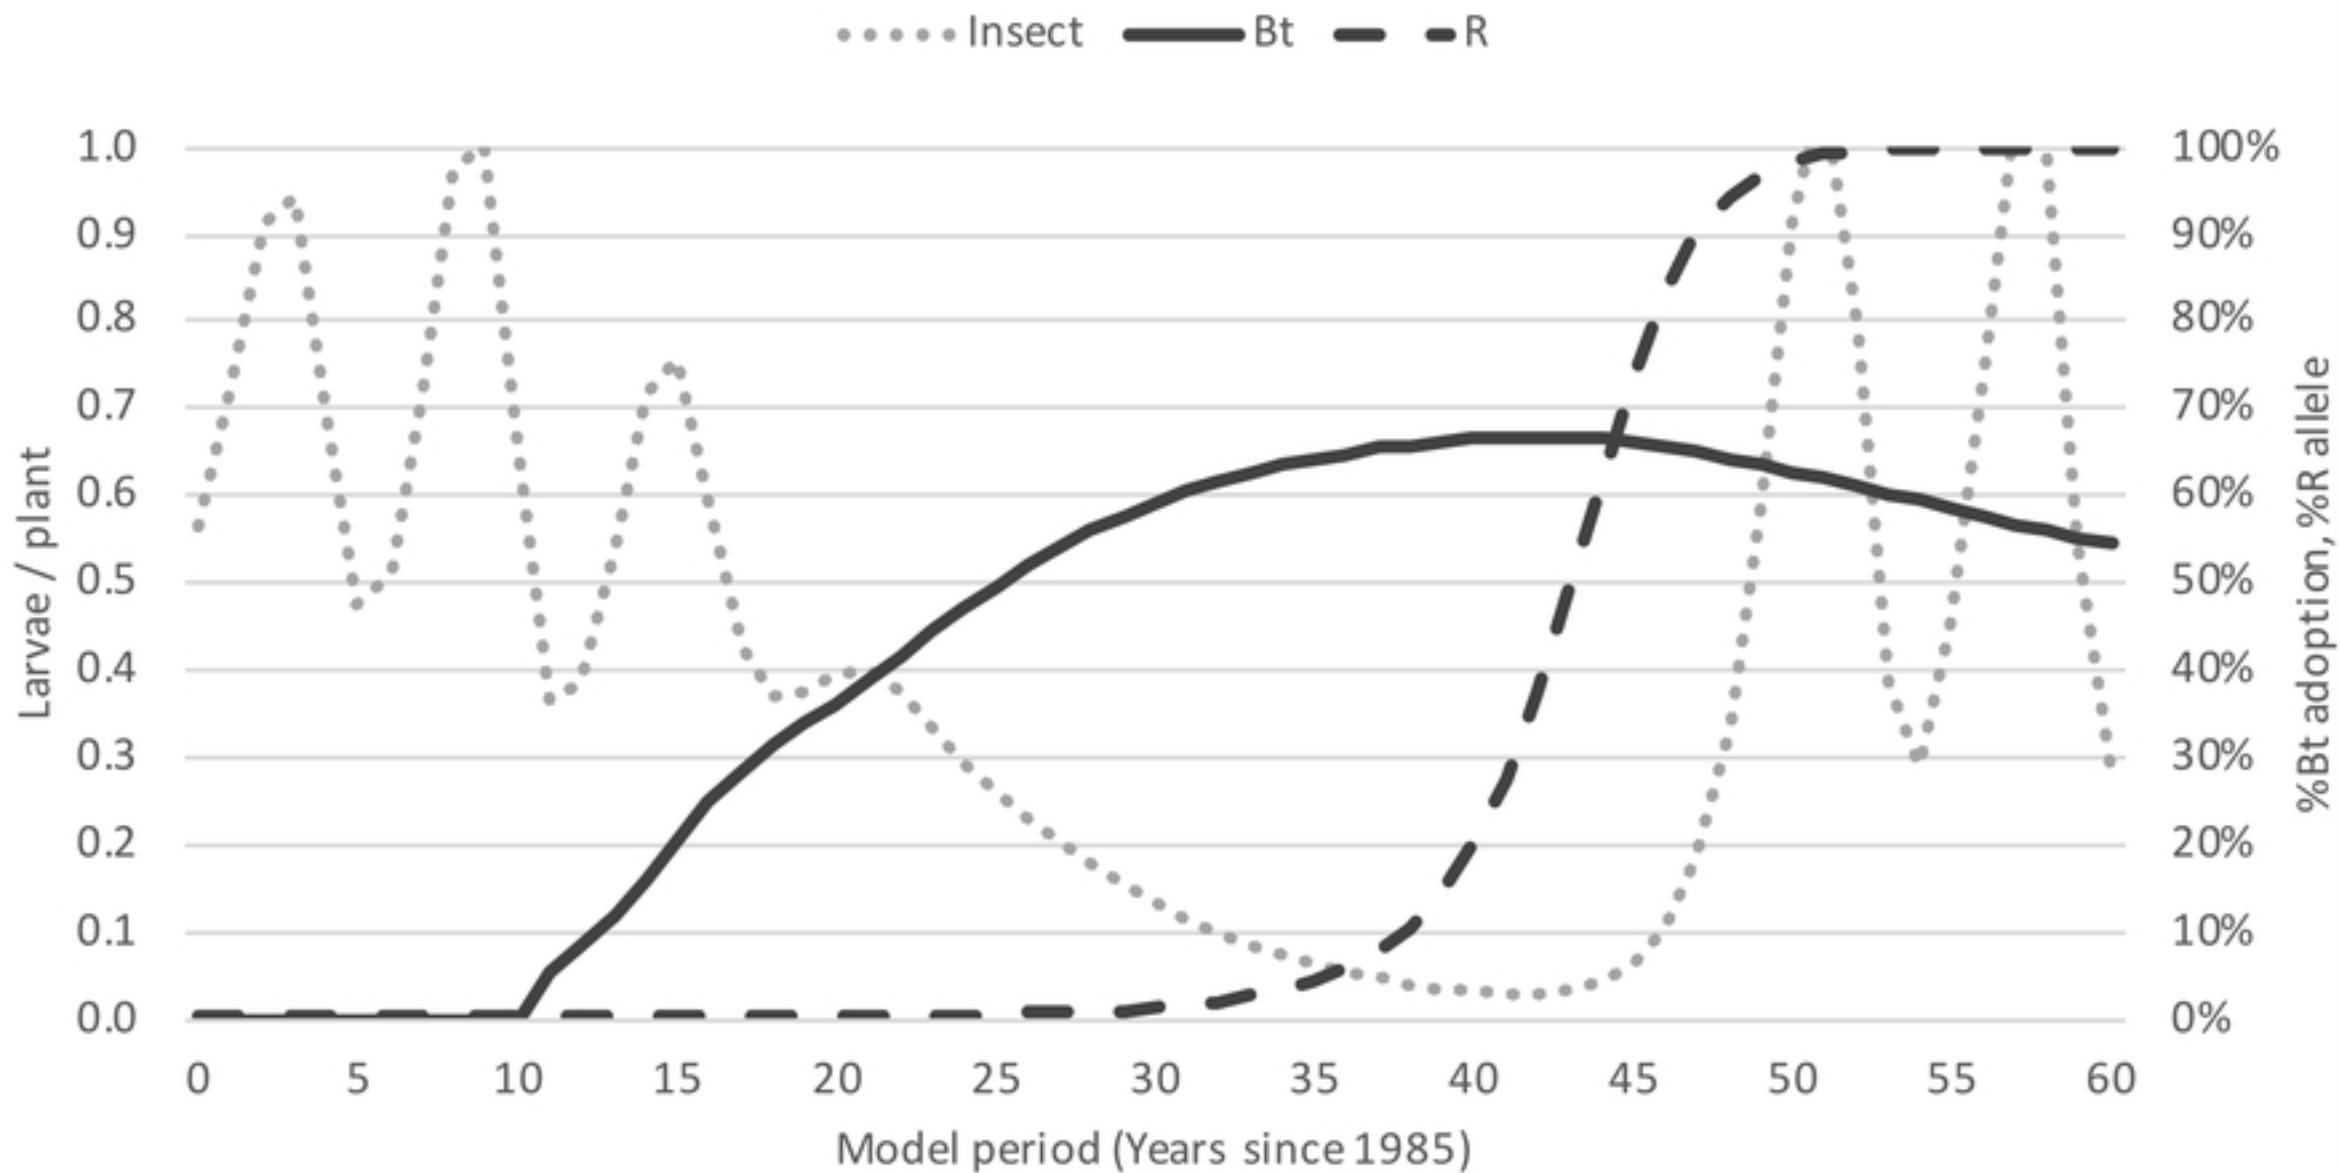

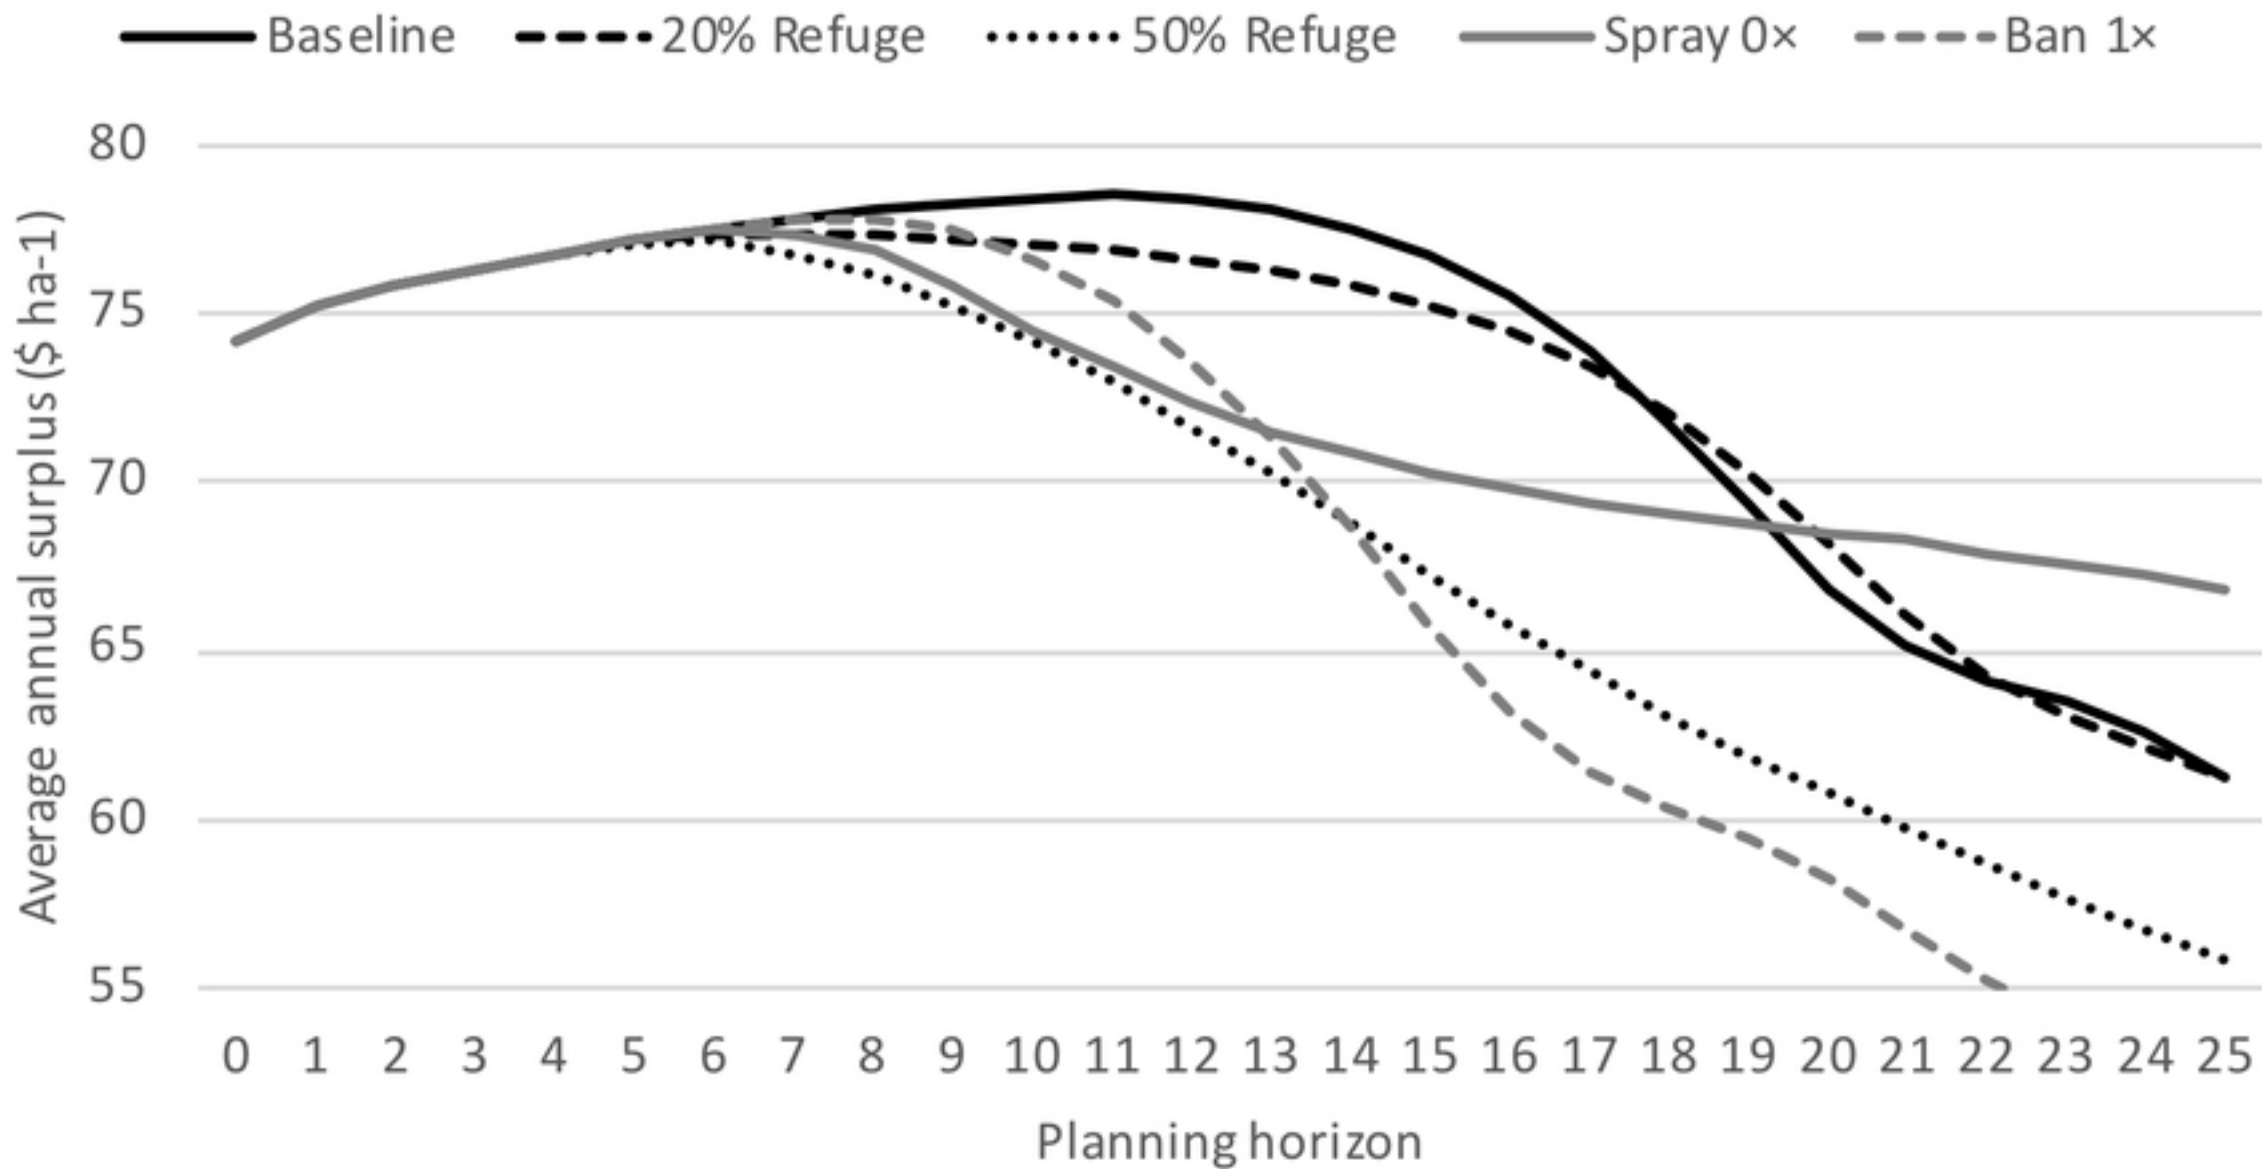

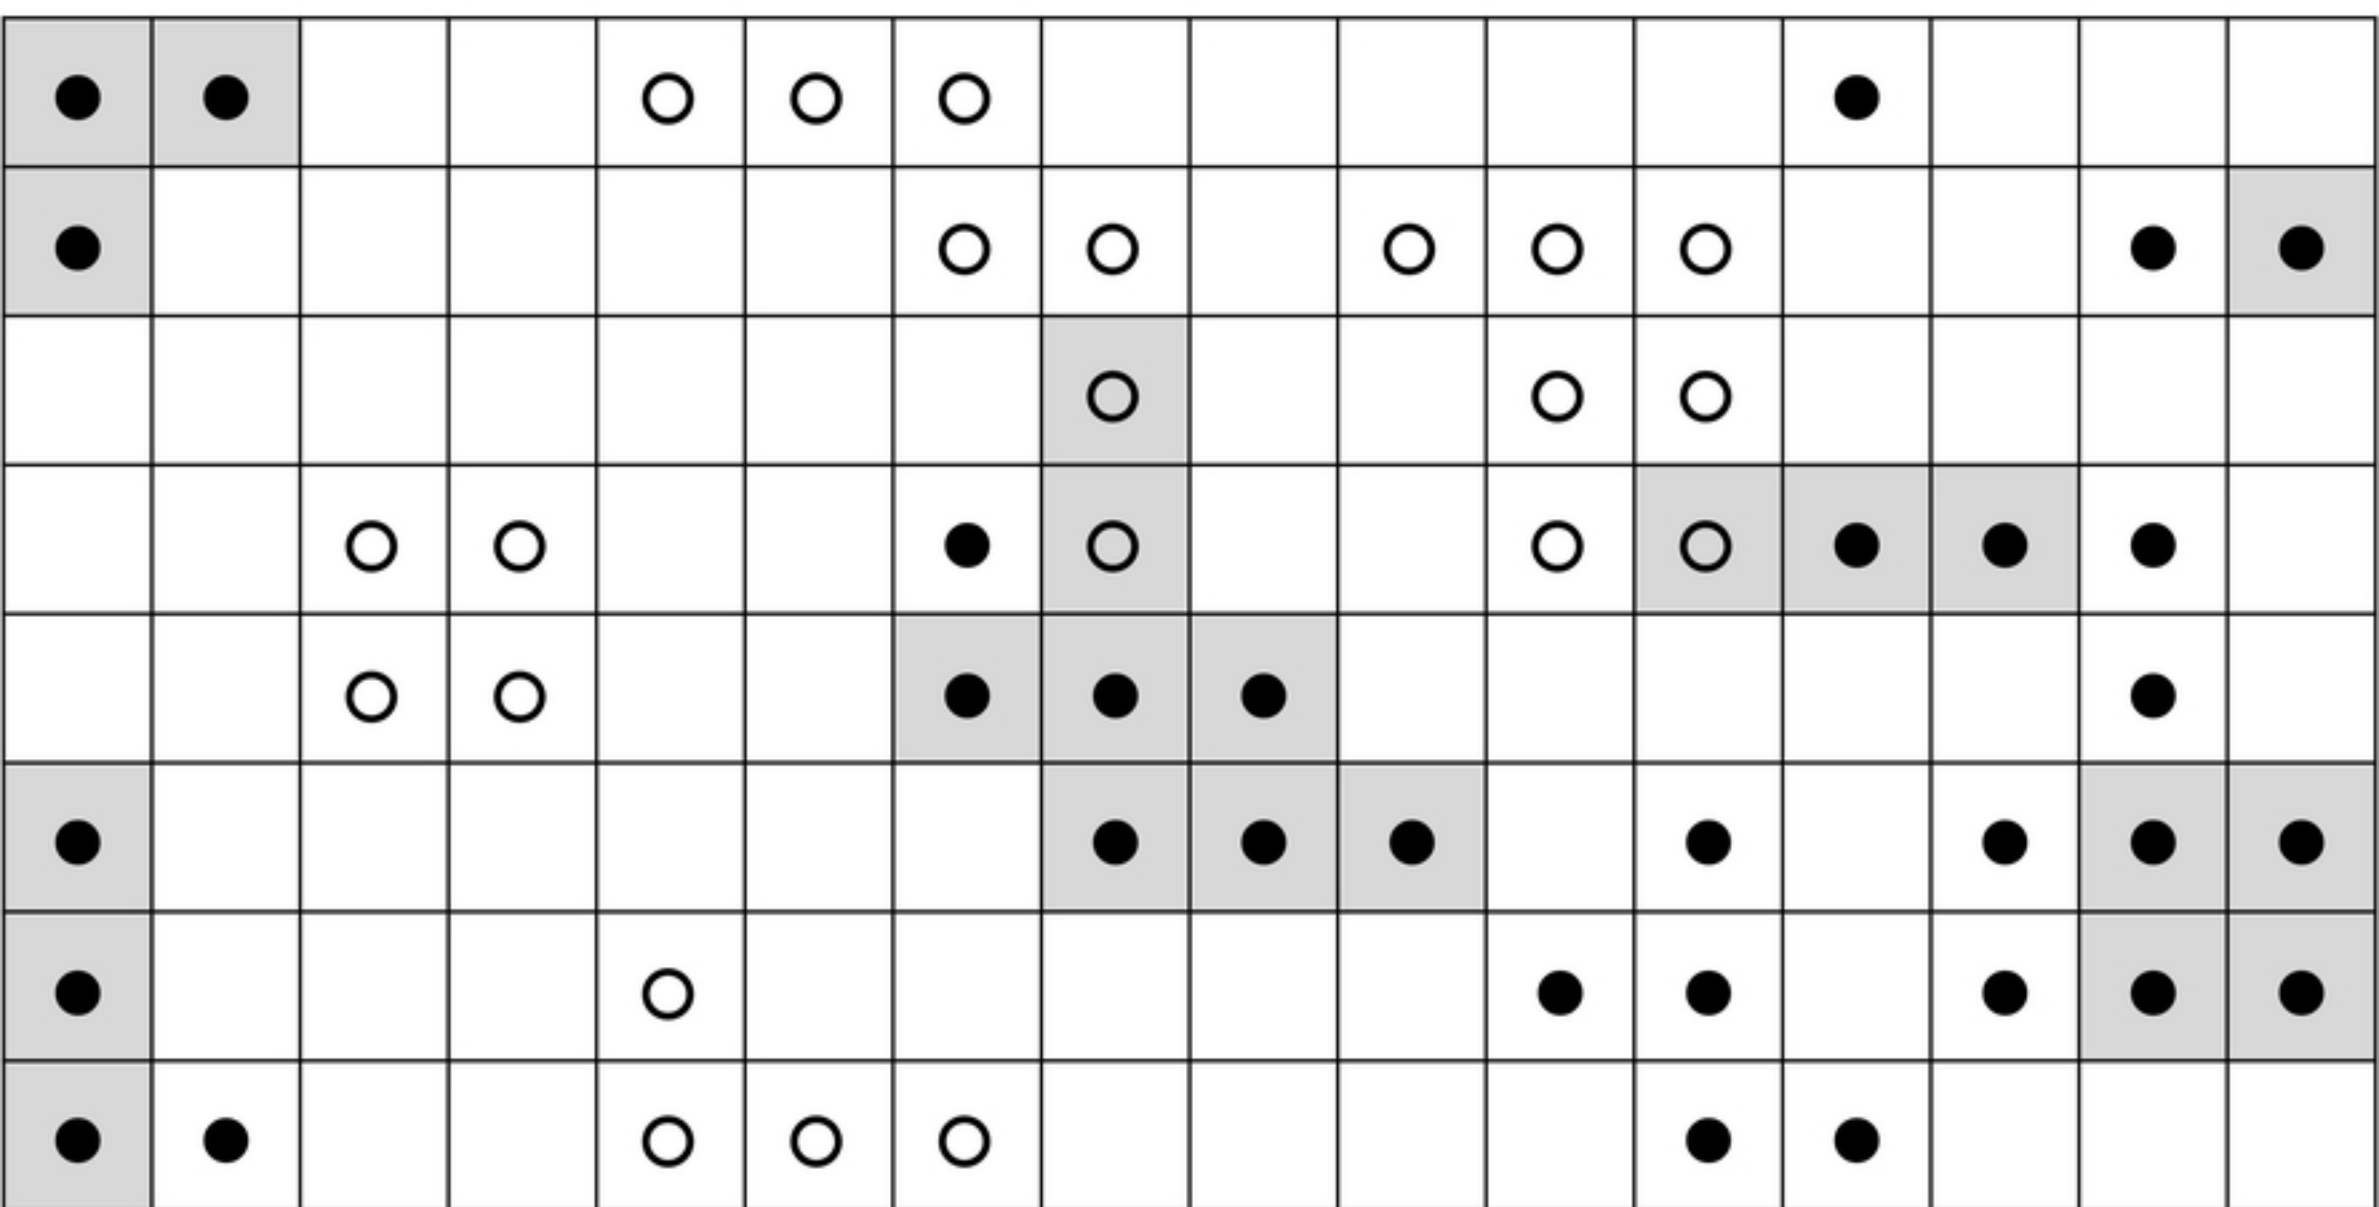

bioRxiv preprint doi: <https://doi.org/10.1101/732776>; this version posted August 12, 2019. The copyright holder for this preprint (which was not certified by peer review) is the author/funder, who has granted bioRxiv a license to display the preprint in perpetuity. It is made available under aCC-BY 4.0 International license.

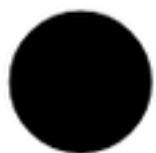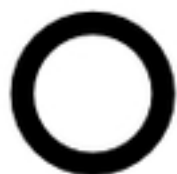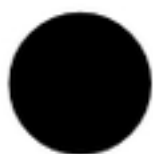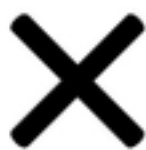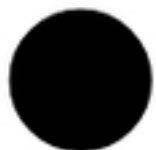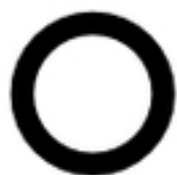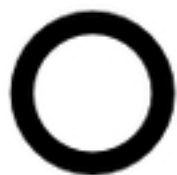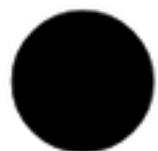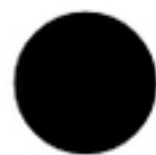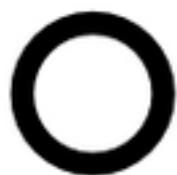

# Baseline

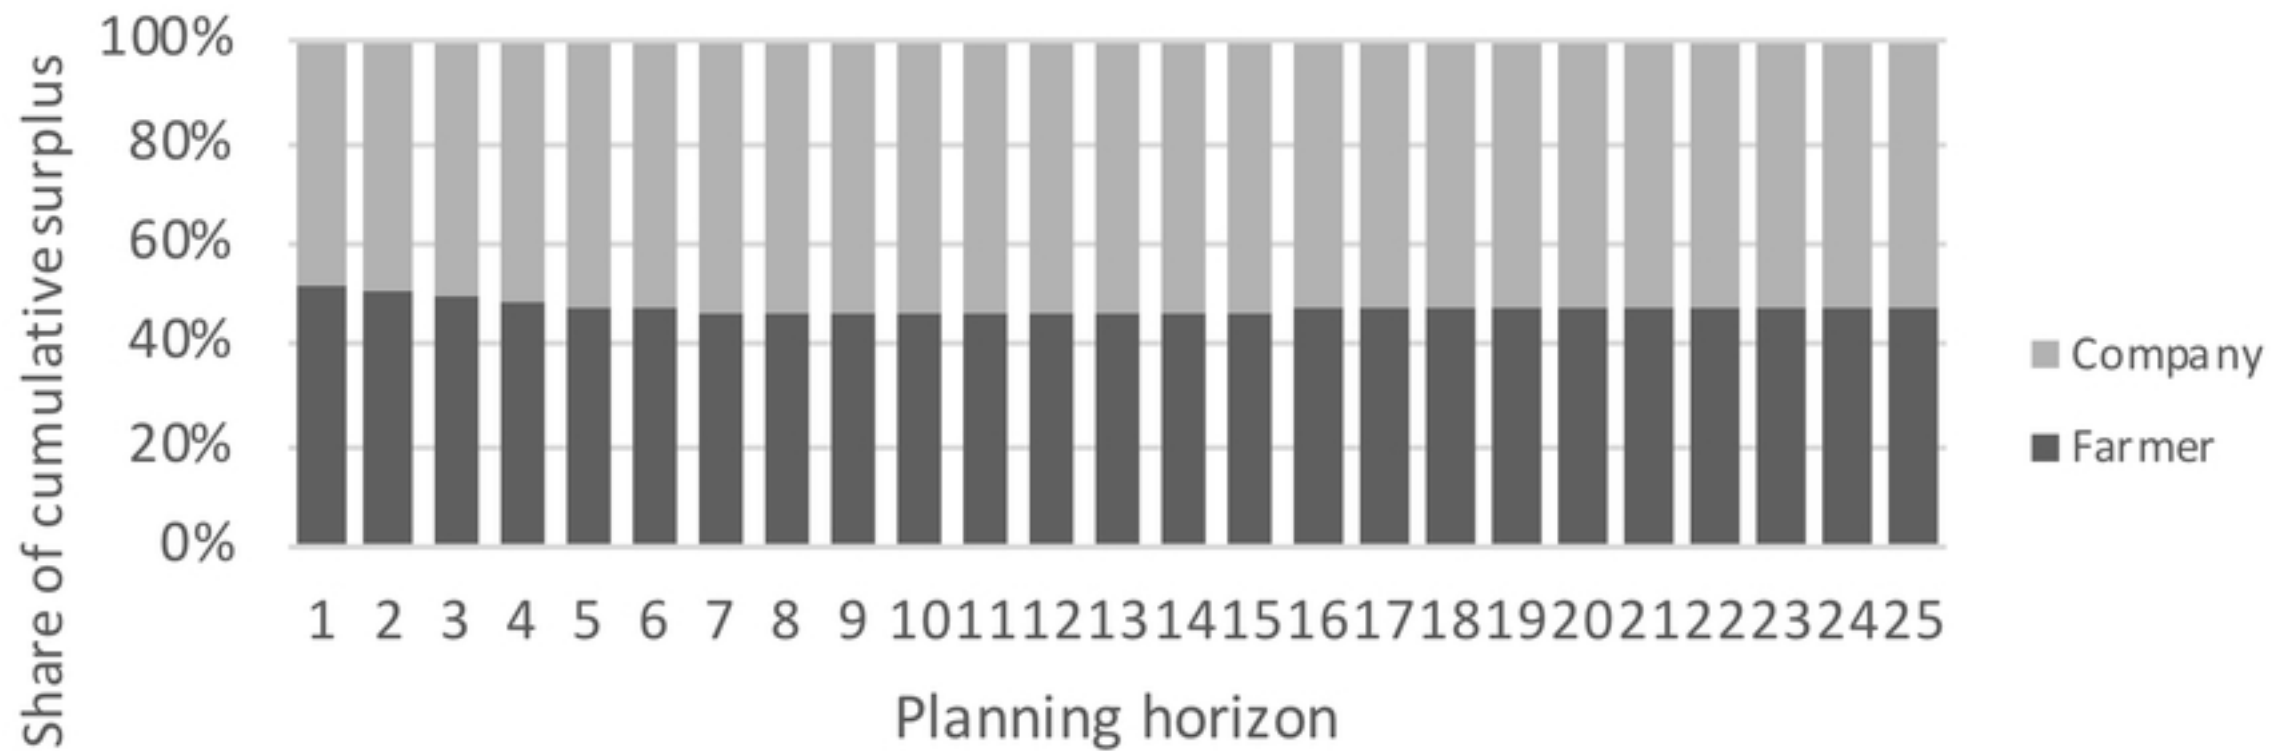

## 20% Refuge

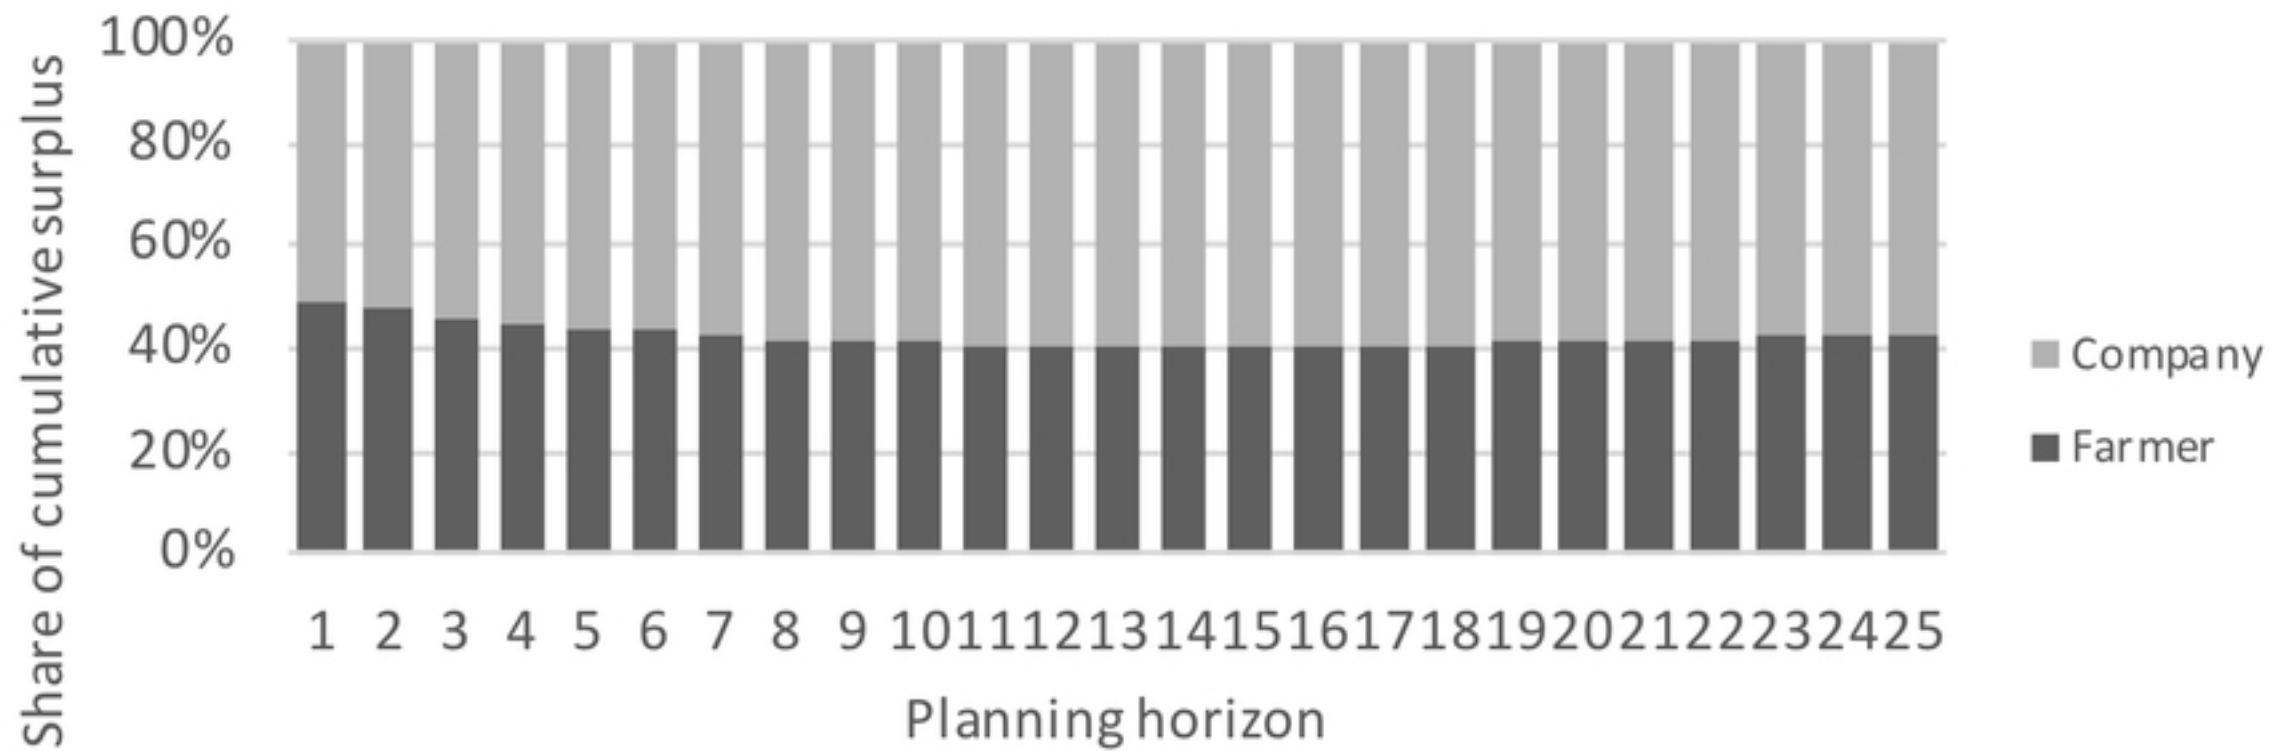

# 20% Refuge + 50% Tax

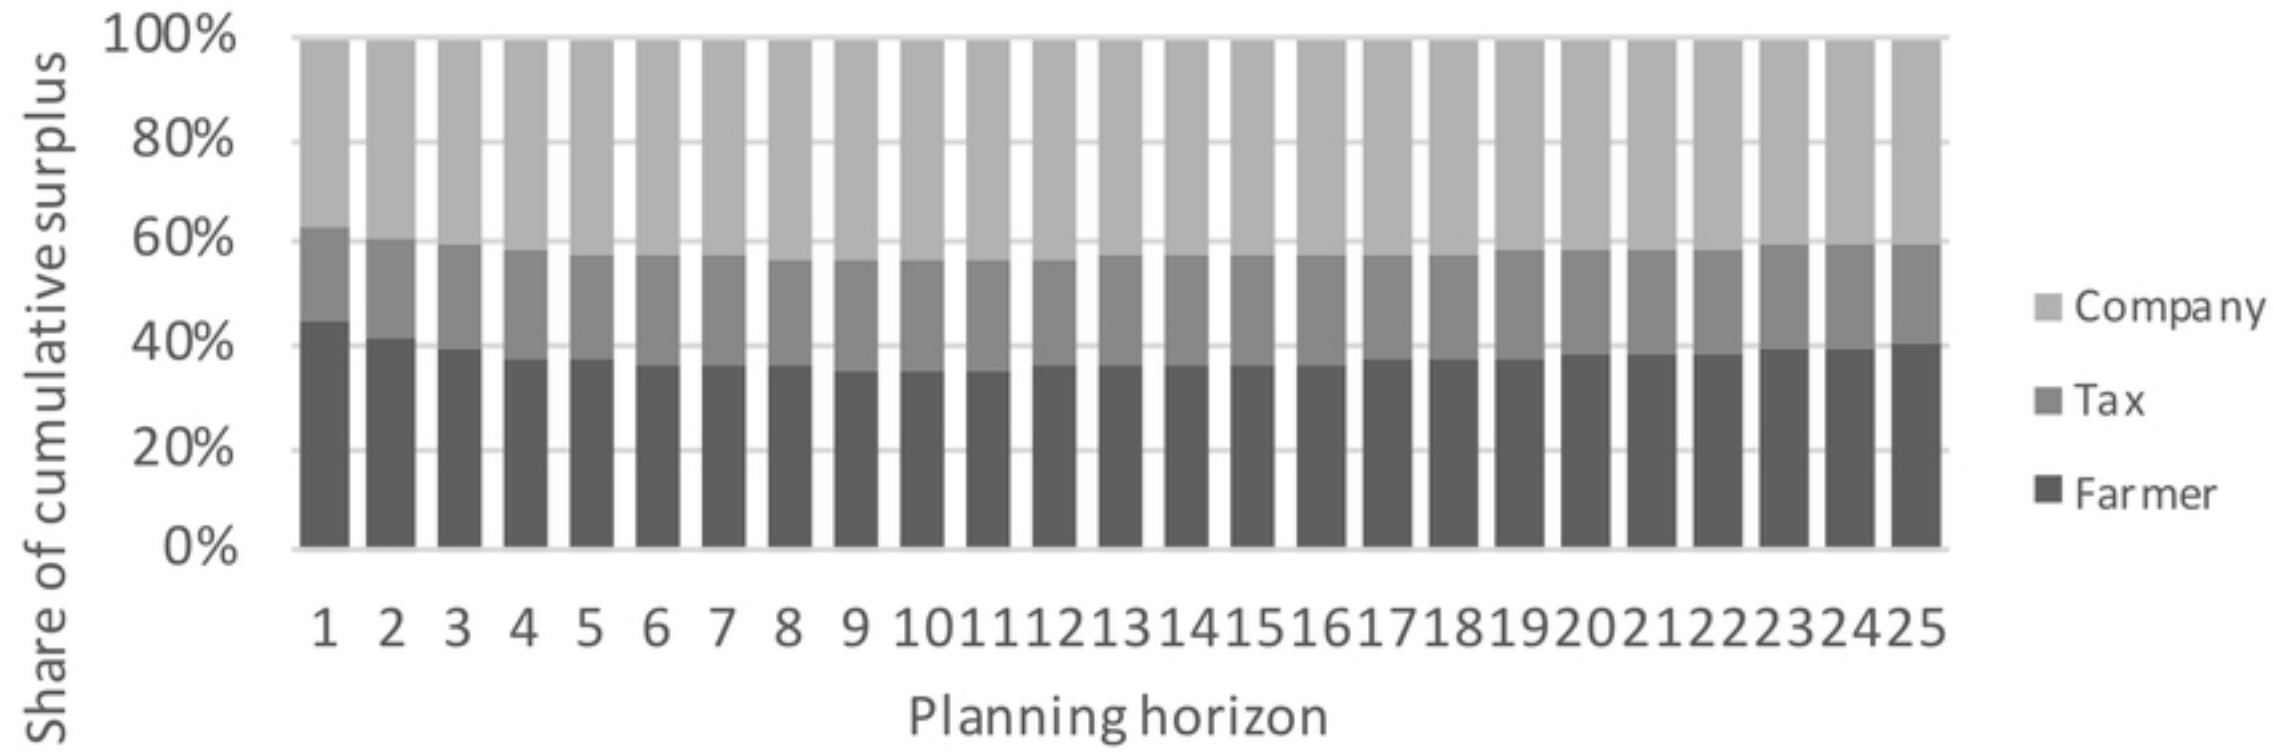



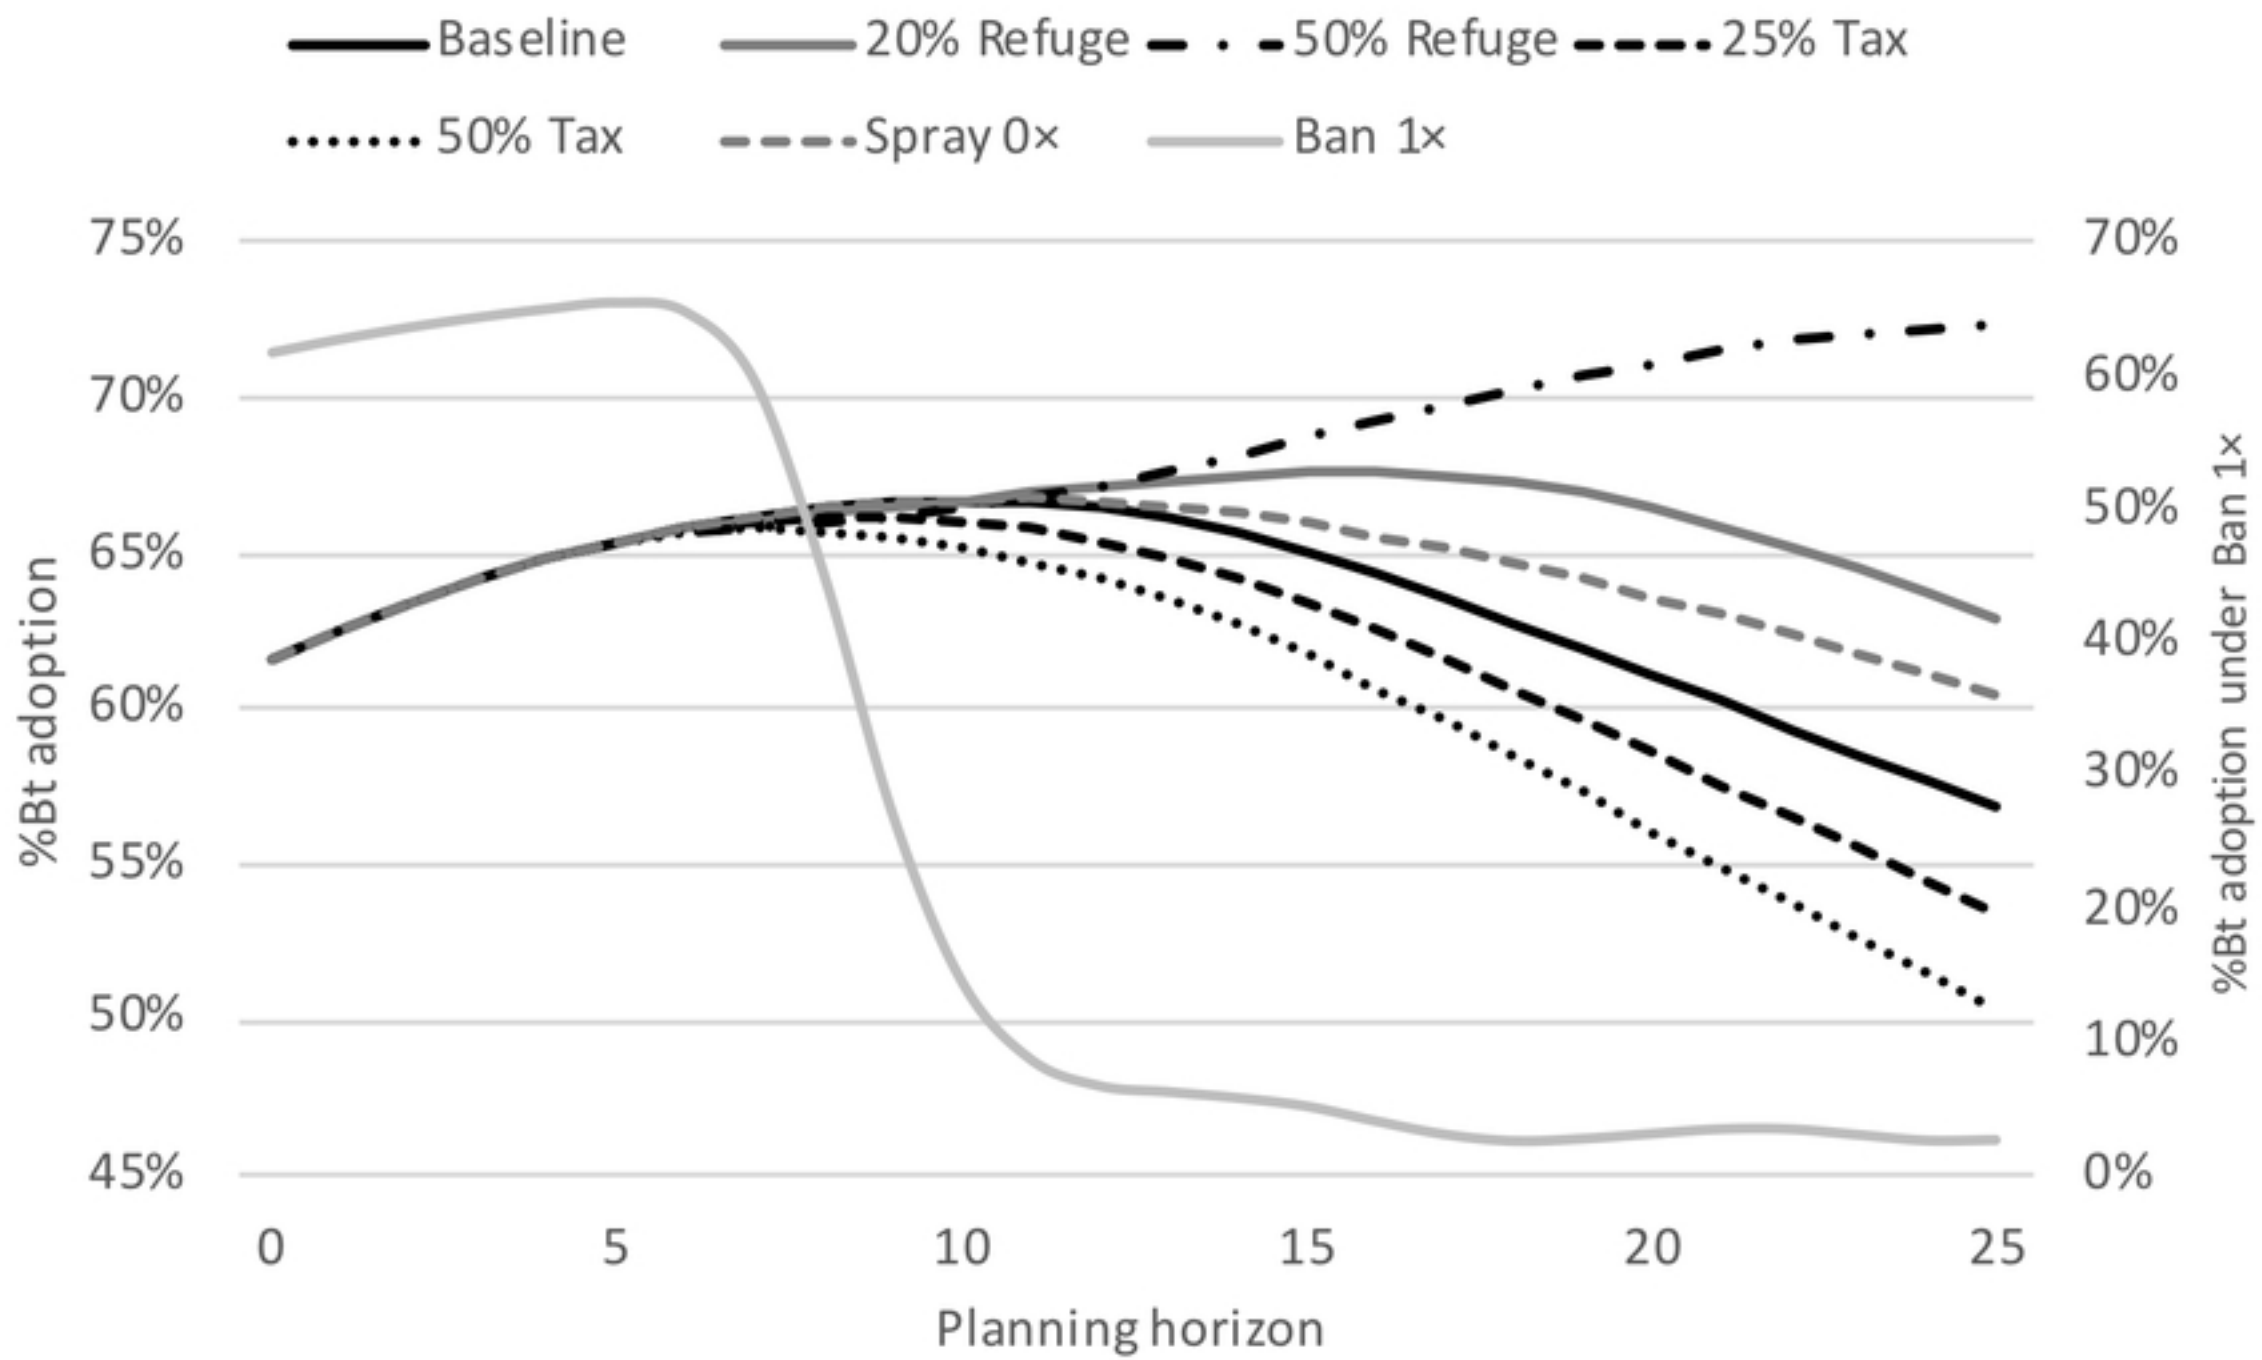

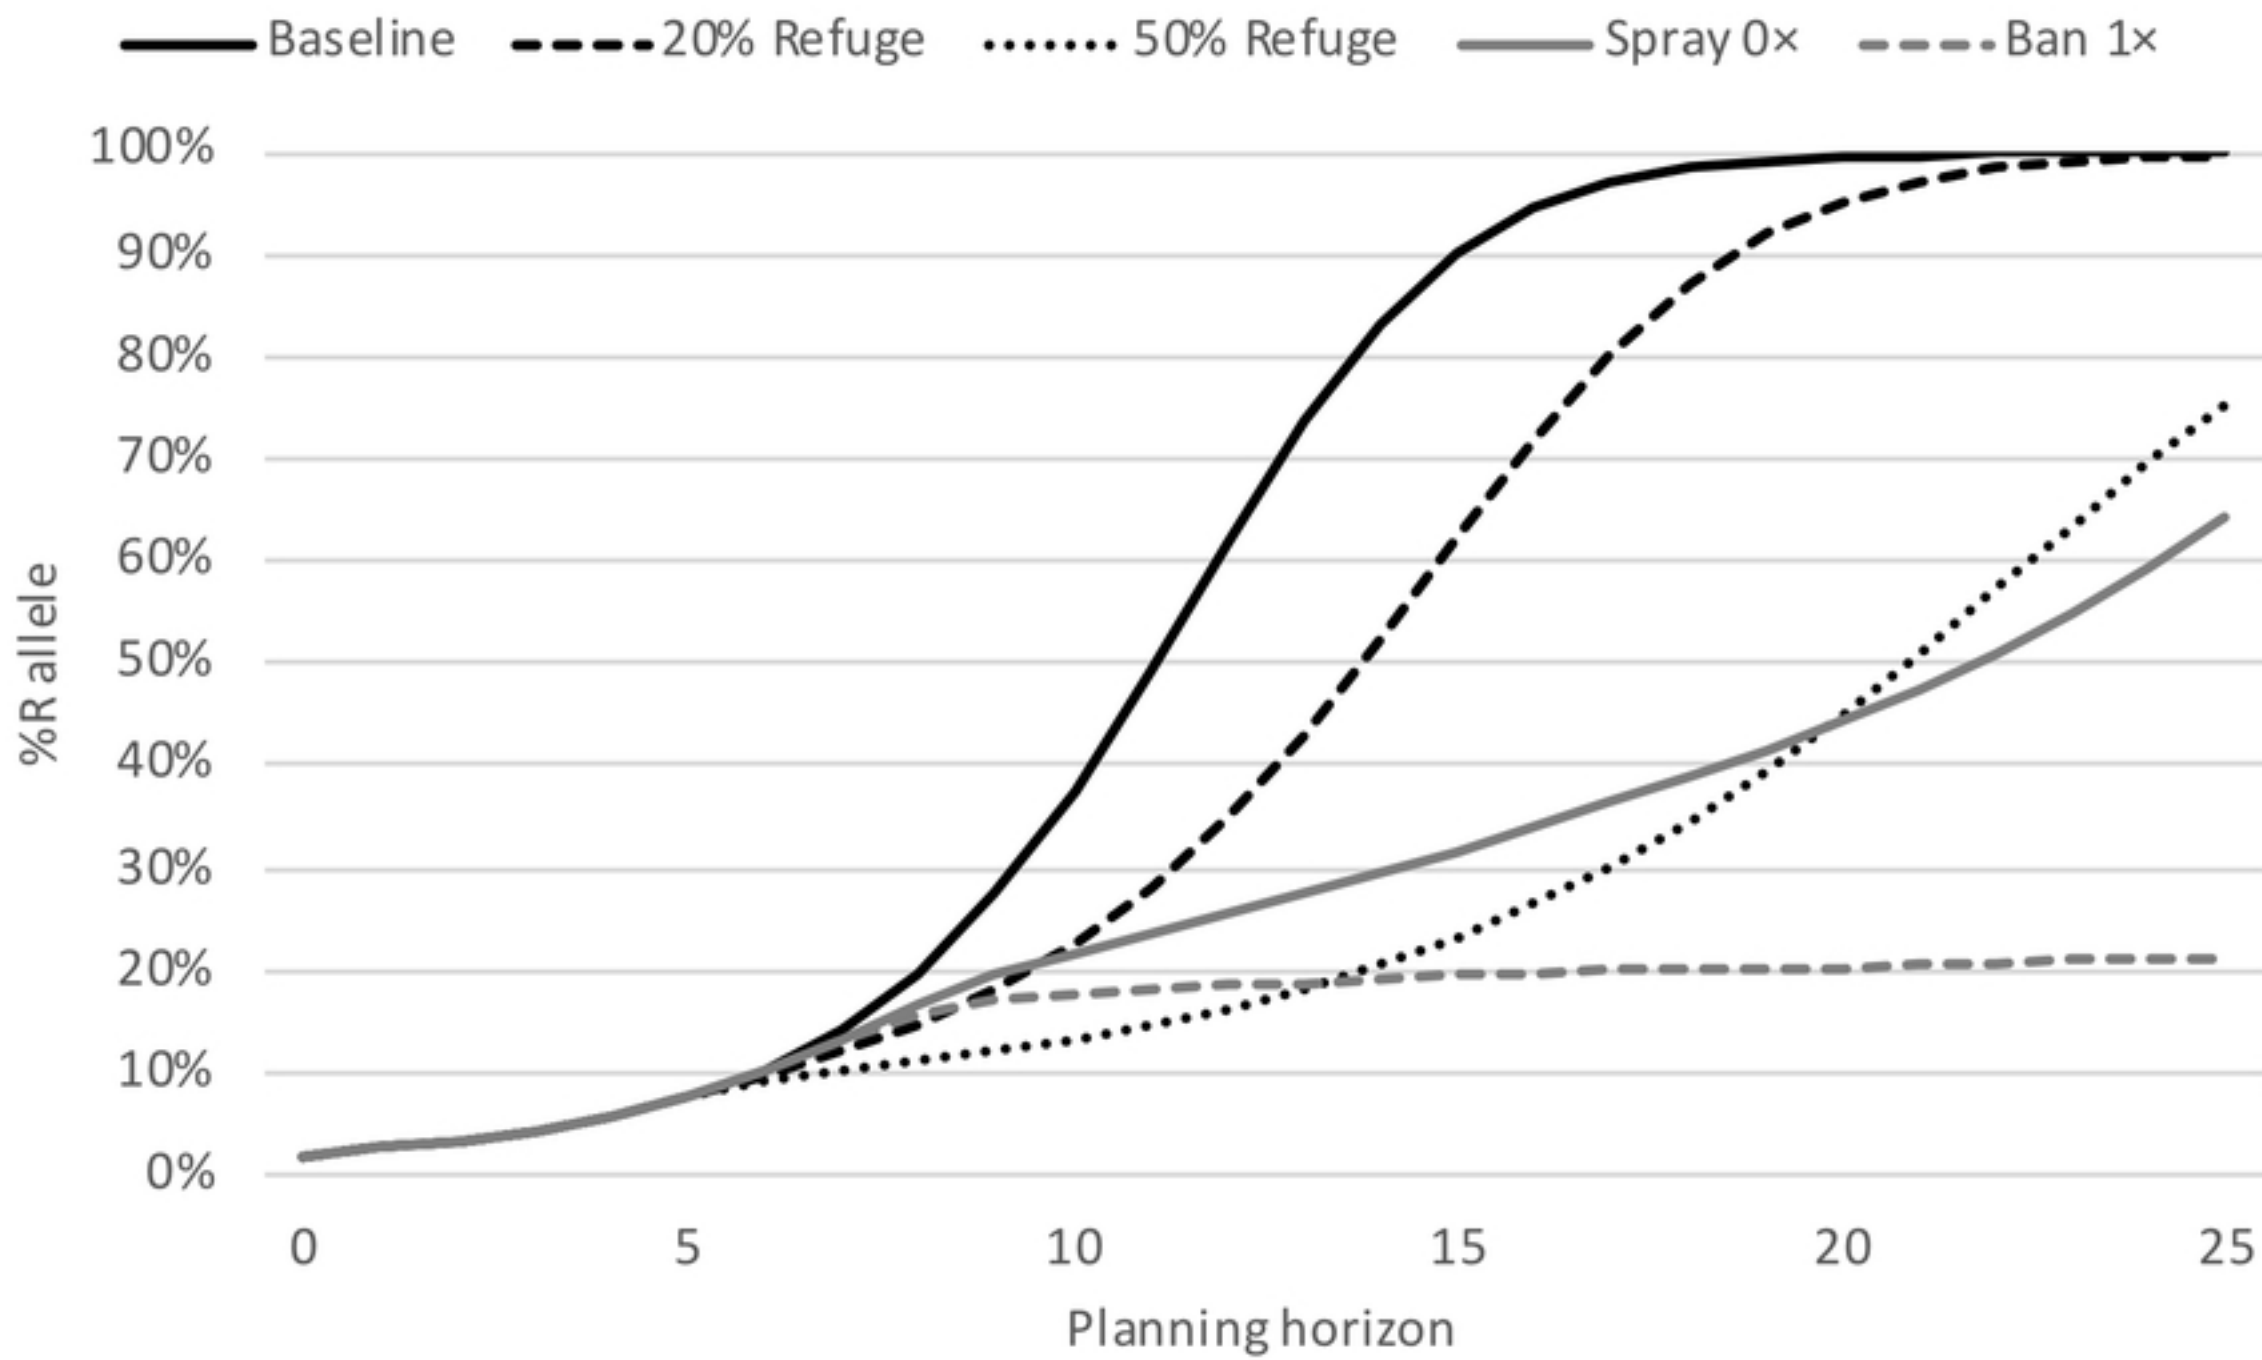

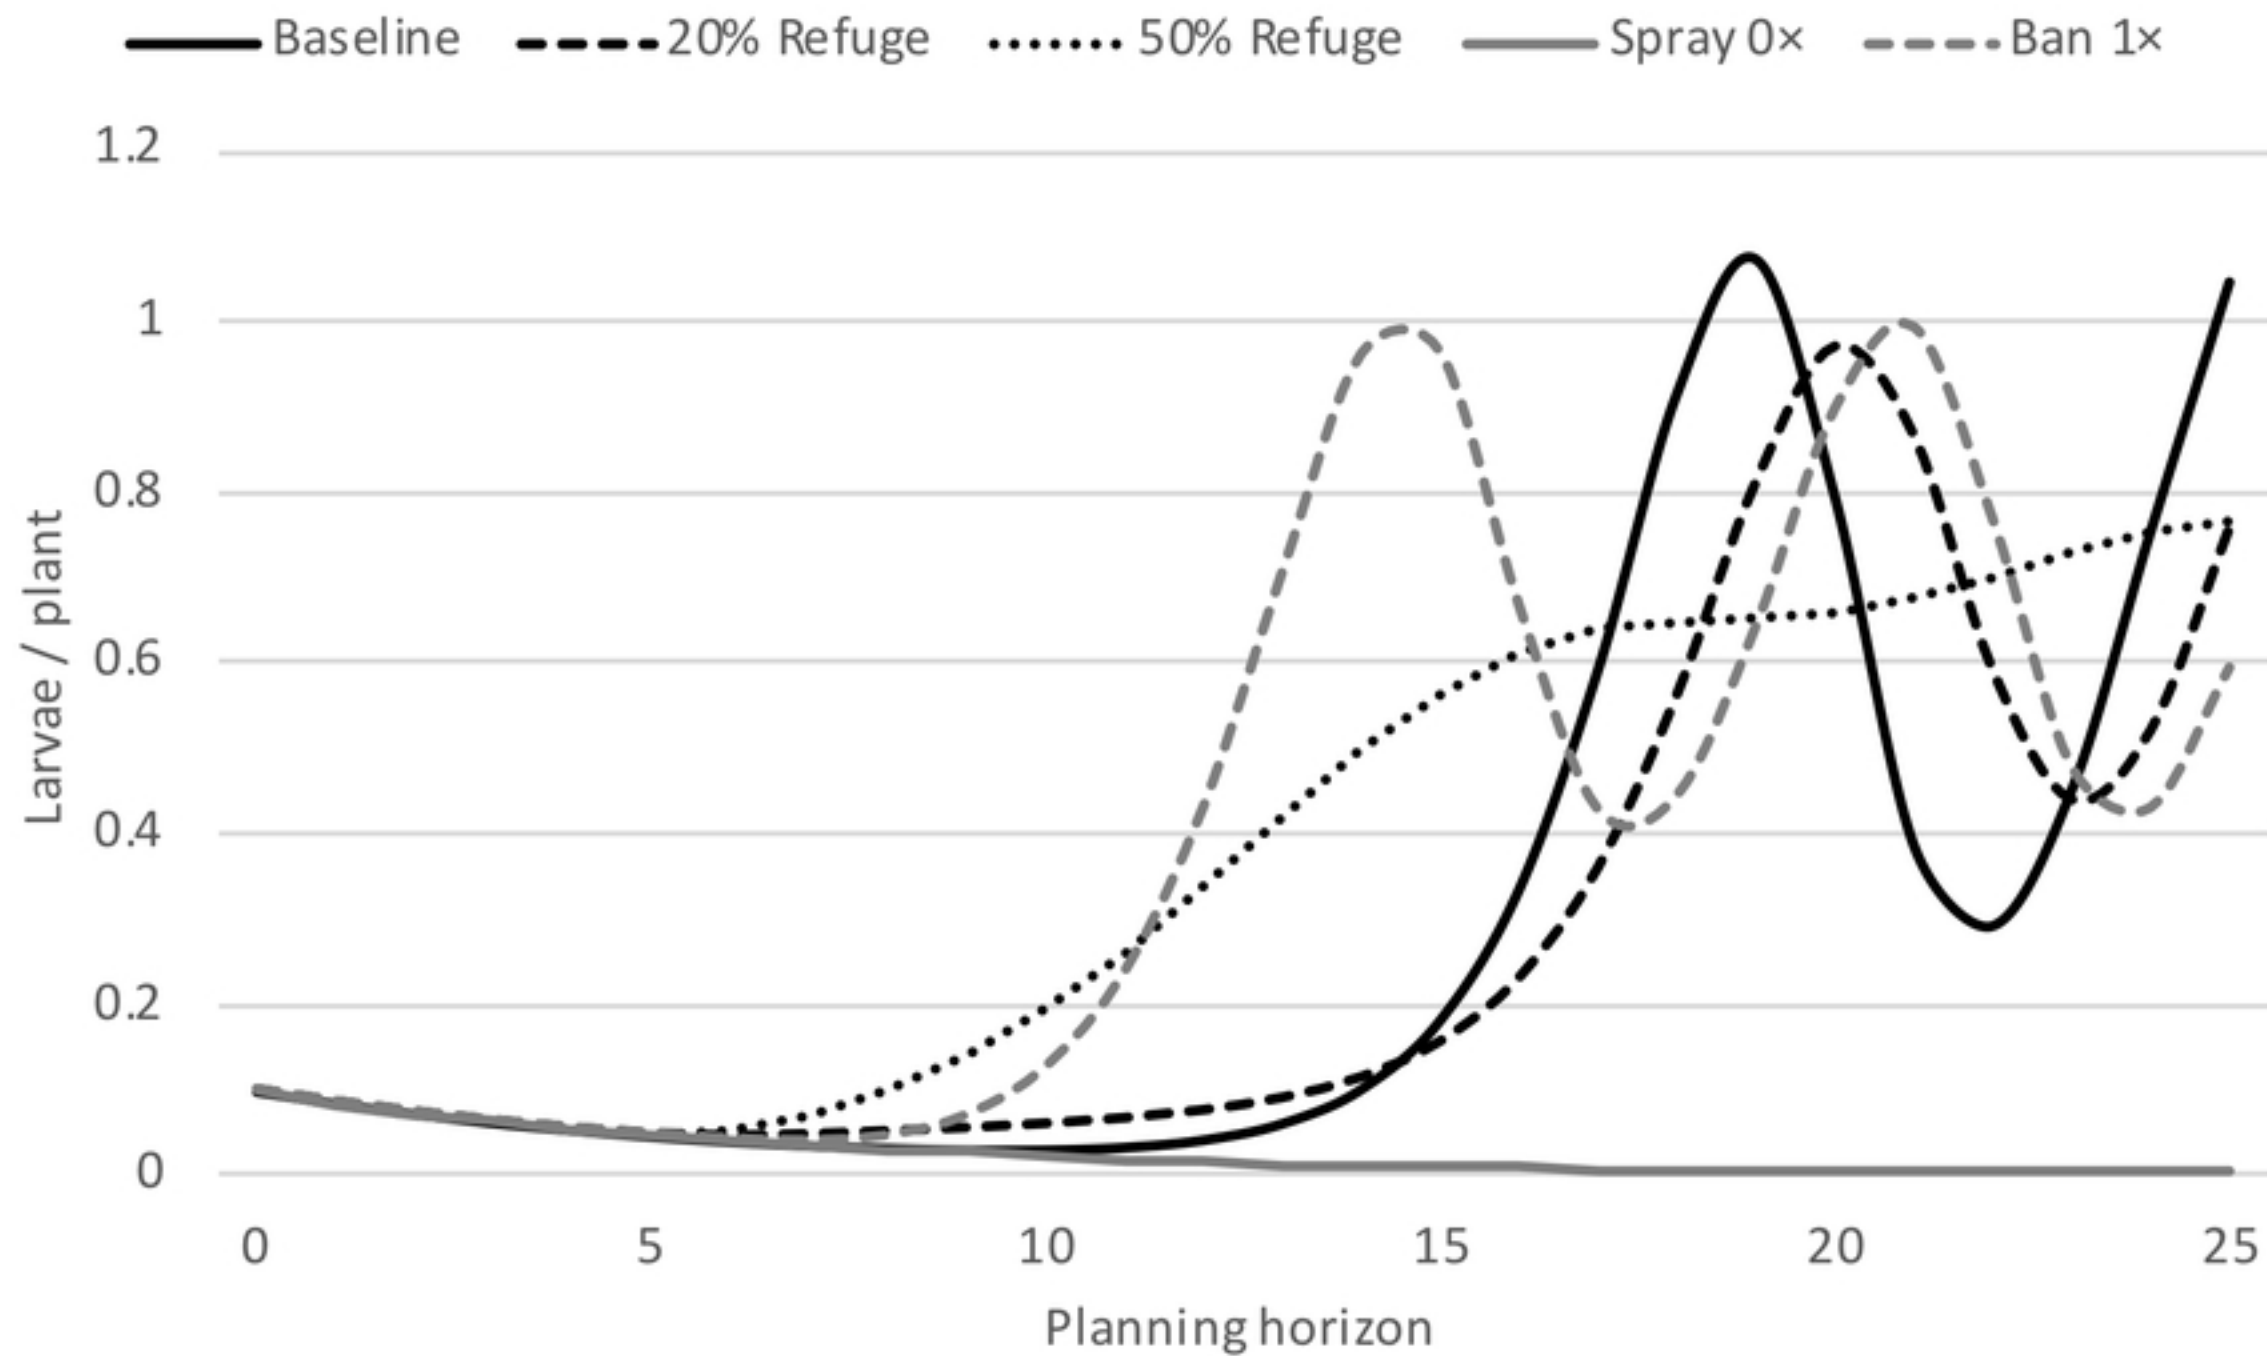

Source: https://www.biorxiv.org/content/10.1101/732776v1.full.pdf
